# Supplementary material for: Borole-based half-sandwich complexes of germanium and tin
Source: Royal Society of Chemistry journal article supplement (doi:10.1039/d1cc06227a), 2021-12-08
Supplement: d1cc06227a1.pdf [file d1cc06227a1.pdf]

Supporting Information

**Borole-Based Half-Sandwich Complexes of Germanium and Tin**

Julijan Sarcevic<sup>b</sup>, Tobias Heitkemper<sup>a,b</sup> & Christian P. Sindlinger<sup>a,b\*</sup>

<sup>a</sup>Institut für Anorganische Chemie, RWTH Aachen University, Landoltweg 1a, 52074 Aachen, Germany

<sup>b</sup>Institut für Anorganische Chemie, Tammannstr. 4, 37077 Göttingen, Germany

**Table of Contents**

|                                        |    |
|----------------------------------------|----|
| Experimental Details .....             | 3  |
| General Information .....              | 3  |
| Mass spectrometry .....                | 3  |
| NMR spectroscopy .....                 | 3  |
| Starting materials and reagents .....  | 3  |
| Synthesis and Analytical Data.....     | 5  |
| Compound 1 .....                       | 5  |
| Analytical Data for Compound 1.....    | 5  |
| Crystal structure of Compound 1 .....  | 6  |
| Spectra Plots for Compound 1.....      | 7  |
| Compound 2 .....                       | 10 |
| Analytical Data for Compound 2.....    | 10 |
| Crystal structure of Compound 2 .....  | 11 |
| Spectra Plots for Compound 2.....      | 11 |
| Compound 3a .....                      | 14 |
| Analytical Data for Compound 3a.....   | 14 |
| Crystal structure of Compound 3a.....  | 14 |
| Spectra Plots for Compound 3a.....     | 16 |
| Compound 3b.....                       | 19 |
| Analytical Data for Compound 3b .....  | 19 |
| Crystal structure of Compound 3b ..... | 20 |
| Spectra Plots for Compound 3b.....     | 21 |
| Compound 4a .....                      | 24 |
| Analytical Data for Compound 4a.....   | 24 |
| Crystal structure of Compound 4a.....  | 24 |
| Spectra Plots for Compound 4a.....     | 26 |
| Compound 4b.....                       | 29 |
| Analytical Data for Compound 3b .....  | 29 |
| Crystal structure of Compound 4b ..... | 30 |
| Spectra Plots for Compound 4b.....     | 31 |
| Compound 5b.....                       | 34 |

|                                                                                       |    |
|---------------------------------------------------------------------------------------|----|
| Analytical Data for Compound 5b .....                                                 | 34 |
| Crystal structure of Compound 5b .....                                                | 35 |
| Spectra Plots for Compound 5b.....                                                    | 35 |
| Compound 6b .....                                                                     | 38 |
| Analytical Data for Compound 6b .....                                                 | 38 |
| Crystal structure of Compound 6b .....                                                | 39 |
| Spectra Plots for Compound 6b.....                                                    | 39 |
| Crystallographic Details .....                                                        | 44 |
| General Data Acquisition and Processing.....                                          | 44 |
| Crystallographic and Refinement Details 1.....                                        | 44 |
| Crystallographic and Refinement Details 2.....                                        | 44 |
| Crystallographic and Refinement Details 3a.....                                       | 44 |
| Crystallographic and Refinement Details 3b .....                                      | 45 |
| Crystallographic and Refinement Details 4a.....                                       | 45 |
| Crystallographic and Refinement Details 4b .....                                      | 45 |
| Crystallographic and Refinement Details 5b .....                                      | 46 |
| Crystallographic and Refinement Details 6b .....                                      | 46 |
| Tabulated Crystallographic Details 1, 2, 3a, 3b, 4a, 4b, 5b and 6b .....              | 47 |
| Computational Details.....                                                            | 48 |
| Structure Optimisation, Frequency Calculation and Electronic Structure Analyses ..... | 48 |
| QTAIM and ELF (Electron Localization Function) .....                                  | 49 |
| Computational assessment of <sup>119</sup> Sn NMR shifts .....                        | 49 |
| XYZ-coordinates of optimised structures .....                                         | 51 |
| Literature.....                                                                       | 55 |

## Experimental Details

### General Information

All manipulations requiring handling under inert conditions were carried out under argon atmosphere using standard Schlenk techniques or an MBraun Glovebox with an Ar atmosphere. Benzene was obtained from an MBraun SPS and stored over molecular sieves, toluene and ether were distilled from sodium. Dichloromethane was distilled from CaH<sub>2</sub>. Hexane and pentane were distilled from Na/K alloy. THF was distilled from potassium. Dichloromethane-*d*<sub>2</sub> was distilled from CaH<sub>2</sub>, THF-*d*<sub>8</sub> was dried over LiAlD<sub>4</sub> and vacuum transferred, benzene-*d*<sub>6</sub> was distilled from potassium, toluene-*d*<sub>8</sub> was distilled from potassium and solvents were degassed and stored in a glove box. All solvents were routinely degassed three times using freeze-pump-thaw cycles.

Elemental analysis was performed by the Analytisches Labor, Institut für Anorganische Chemie, Universität Göttingen

### Mass spectrometry

Mass spectra were recorded by the Zentrale Analytik within the Faculty of Chemistry, Göttingen applying a Liquid Injection Field Desorption Ionisation-technique (LIFDI) on a JEOL accuTOF instrument with an inert-sample application setup under argon atmosphere. The injection capillary was washed several times with dry, distilled and inertly injected toluene before the samples were injected. Samples usually had a concentration of 1 – 2 mmol/L in toluene and were prepared in a glovebox. When appropriate, isotopic patterns have been simulated using the web service provided by [www.cheminfo.org](http://www.cheminfo.org).

### NMR spectroscopy

NMR spectra were recorded with either a Bruker Avance III 400 NMR spectrometer equipped with a 5 mm BBFO ATM probe head and operating at 400.13 MHz (<sup>1</sup>H), 100.61 MHz (<sup>13</sup>C), 128.38 MHz (<sup>11</sup>B) and 376.45 MHz (<sup>19</sup>F) along with a variable temperature set-up or a Bruker Avance Neo 400 NMR spectrometer with a CryoProbeProdigy BB ATM probe head operating at 400.25 MHz (<sup>1</sup>H) and 100.65 MHz (<sup>13</sup>C) or a Bruker AVIII HD 500 NMR spectrometer with a CryoProbeProdigy ATM probe head and operating at 500.25 MHz (<sup>1</sup>H), 125.80 MHz (<sup>13</sup>C), 160.50 MHz (<sup>11</sup>B), 186.19 MHz (<sup>119</sup>Sn), and 99.37 MHz (<sup>29</sup>Si) or a Bruker Avance II 300 NMR operating at 300.13 MHz (<sup>1</sup>H) and 116.64 MHz (<sup>7</sup>Li). Chemical shifts are reported in  $\delta$  values in ppm relative to external Me<sub>4</sub>Si and, if not otherwise stated, referenced using the chemical shift of the solvent <sup>2</sup>H lock resonance frequency and  $\Xi = 19.867187\%$  for <sup>29</sup>Si,  $\Xi = 38.863797\%$  for <sup>7</sup>Li,  $\Xi = 32.083974\%$  for <sup>11</sup>B, and  $\Xi = 37.290632\%$  for <sup>119</sup>Sn.<sup>1</sup> <sup>1</sup>H and <sup>13</sup>C spectra have been referenced on specific values for the respective solvent signal. The proton and carbon signals were assigned where possible via a detailed analysis of <sup>1</sup>H, <sup>13</sup>C, <sup>1</sup>H-<sup>1</sup>H COSY, <sup>1</sup>H-<sup>1</sup>H NOESY, <sup>1</sup>H-<sup>13</sup>C HSQC, <sup>1</sup>H-<sup>13</sup>C HMBC NMR spectra.

Young-type teflon-valve borosilicate NMR tubes have been used throughout the study.

### Starting materials and reagents

1,3,4-(2',5'-*t*Bu<sub>2</sub>(C<sub>6</sub>H<sub>3</sub>))-2,4-(SiMe<sub>3</sub>)-Borole **A** was prepared as recently reported.<sup>2</sup> *tert*-Butyllithium solutions (1.6 M in pentane) were obtained from Sigma Aldrich und used within two month from purchase.

Cp\*GeCl was prepared as previously described in the literature.<sup>3</sup>

**3,5-Me<sub>2</sub>(C<sub>6</sub>H<sub>3</sub>)-CC-SiMe<sub>3</sub>** (Xyl-CC-TMS) was prepared along modified literature procedures.<sup>2, 4</sup> A 1000 mL Schlenk-flask was charged with a mixture of palladium(II)acetate (0.62 g, 2.8 mmol, 0.5 mol%), copper(I)iodide (0.67 g, 3.5 mmol, 0.6 mol%) and triphenylphosphine (2.85 g, 10.9 mmol, 2 mol%). Bromo-3,5-dimethylbenzene (100 g, 540.34 mmol, 1 eq.) and triethyl amine (500 mL) were added and the resulting suspension was degassed one time using the *freeze-pump-thaw*-method. After the addition of trimethylsilyl acetylene (85 mL, 594.37 mL, 1.1 eq.) the suspension was stirred overnight at 80-90 °C. A greyish solid precipitated and was filtered off and washed with hexane until the hexane washes remained colorless. The solvents were removed in *vacuo* giving a dark brown liquid which was subsequently purified via vacuum distillation (1.0 · 10<sup>-3</sup> mbar, 74 °C head temperature, 120 °C oil bath). (3,5-Dimethylphenyl)trimethylsilyl acetylene was obtained as a yellow liquid (101.86 g, 503.34 mmol, 93 %). NMR-spectroscopic features are found identical to those reported previously.<sup>4</sup>

<sup>1</sup>H (300.13 MHz, 298 K, CDCl<sub>3</sub>, CHCl<sub>3</sub> at 7.26 ppm): 7.10 (s, 2H, *o*-H), 6.95 (s, 1H, *p*-H), 2.27 (s, 6H, *m*-CH<sub>3</sub>), 0.24 (s, 9H, TMS).

**1,4-Diiodo-1,4-TMS<sub>2</sub>-2,3-Xyl<sub>2</sub>-buta-1,3-diene** was prepared along modified literature procedures.<sup>2</sup> Under inert conditions, a 1000 mL two-necked Schlenk-flask was charged with freshly ground Cp<sub>2</sub>ZrCl<sub>2</sub> (24.60 g, 84.15 mmol, 0.57 eq.). THF (500 mL, SPS grade) was added. The resulting solution was then cooled to -78 °C. *n*-Butyllithium (66 mL, 2.5 M in hexane, 1.1 eq.) was added dropwise over a period of 25 min to the cold solution. The dropping funnel was rinsed with THF (10 mL, SPS grade) and the resulting yellow suspension was continuously stirred for 1.5 h at -78 °C. (3,5-Dimethylphenyl)trimethylsilyl acetylene (30 g, 148 mmol, 1 eq.) was added dropwise and the reaction was subsequently allowed to warm to ambient temperature overnight. The resulting orange suspension was cooled to 0 °C and copper(I)chloride (8.26 g, 83.5 mmol, 0.56 eq.) was added. A solution of iodine (39.74 g, 156.6 mmol, 1.05 eq.) in THF (60 mL, SPS grade) was added over a period of 45 min via dropping funnel. The flask was wrapped with aluminium foil and the dark suspension was stirred for three days at room temperature. A solution of sodium dithionite (ca. 5 g in 150 mL H<sub>2</sub>O) and diethyl ether (100 mL) were added. The phases were separated and the aqueous phase was extracted with diethylether (2 x 100 mL). The combined organic phases were dried over MgSO<sub>4</sub> and filtered. After the removal of the solvents in vacuo, the viscous suspension was diluted in hexane and then filtered through celite. The celite pad was rinsed with hexane until the solvent running through turned colorless. The orange filtrate was concentrated to brownish oil which slowly started to crystallize. The oil was stored at -30 °C overnight. The dark green supernatant was removed and slightly greenish crystals were recrystallized from acetone (50 mL, p. a. grade). The supernatant was removed and the crystals were then washed with portions of cold (-25 °C) acetone. After drying under reduced pressure, the 1,4-Diiodo-1,4-TMS<sub>2</sub>-2,3-Xyl<sub>2</sub>-buta-1,3-diene was obtained as colorless crystals (27.83 g, 42.26 mmol, 57 %). **Note:** The aluminium foil was used to protect the reaction from light. We observed that if the nearly colorless product was stored under daylight it increasingly darkens. The product has an unpleasant odor.

<sup>1</sup>H (300.13 MHz, 298 K, C<sub>6</sub>D<sub>6</sub>, C<sub>6</sub>D<sub>5</sub>H at 7.15 ppm): 6.90 (s, 2H, *p*-H), 6.76 (s, 4H, *o*-H), 2.22 (s, 12H, *m*-CH<sub>3</sub>), -0.04 (s, 18H, TMS).

<sup>13</sup>C{<sup>1</sup>H} (100.64 MHz, 298 K, C<sub>6</sub>D<sub>6</sub> solvent signal at 128.0 ppm): 163.4 (Xy-C), 139.3 (*m*-C<sub>ar</sub> or *ipso*-C<sub>ar</sub>), 137.0 (*m*-C<sub>ar</sub> oder *ipso*-C<sub>ar</sub>), 129.8 (*p*-C<sub>ar</sub>), 127.4 (*o*-C<sub>ar</sub>), 112.0 (C-I), 21.4 (*m*-CH<sub>3</sub>), 1.1 (TMS).

**Elemental Analysis:** (C<sub>26</sub>H<sub>36</sub>I<sub>2</sub>Si<sub>2</sub>) calcd C 47.42, H 5.51, I 38.54, Si 8.53, observed C 47.45, H 5.51.

**HR-ESI-MS:** calcd exact mass: 658.0445 m/z, observed m/z: 676.0783 [M+NH<sub>4</sub>]<sup>+</sup>, 681.0337 [M+Na]<sup>+</sup>, calcd for [C<sub>26</sub>H<sub>37</sub>I<sub>2</sub>Si<sub>2</sub>]<sup>+</sup>: 659.0523 m/z, observed m/z: 659.0518.

**1,4-Dilithio-1,4-TMS<sub>2</sub>-2,3-Xyl<sub>2</sub>-buta-1,3-diene** was prepared along modified literature procedure.<sup>2</sup> In a Schlenk-flask, 1,4-Diiodo-1,4-TMS<sub>2</sub>-2,3-Xyl<sub>2</sub>-buta-1,3-diene (5.05 g, 7.67 mmol, 1 eq.) was dissolved in diethyl ether (35 mL, SPS grade) and the solution is cooled to -78 °C. A solution of *tert*-Butyllithium (19.5 mL, 1.6 M in pentane, 31.2 mmol, 4.06 eq (2.03 eq per iodine-atom)) was slowly added via syringe and the resulting red suspension was allowed to warm to ambient temperature overnight. The solvents were thoroughly removed in vacuo and the solid residue was suspended in hexane (20 mL). The suspension was filtered through a filter canula through a pad of glass fiber (Whatman GF/A). The residual solid extracted twice with further amounts of hexane until the filtrate was only of pale orange colour. The dark red filtrate was concentrated under reduced pressure until dryness and transferred into a glovebox. The solid was again suspended in hexane (10 mL, distilled) and then filtered through a syringe filter equipped with a thin plug of glass fiber (Whatman GF/B) to remove remaining traces of LiI. The solvent was removed in vacuo to yield 1,4-Dilithio-1,4-TMS<sub>2</sub>-2,3-Xyl<sub>2</sub>-buta-1,3-diene as an orange crystalline solid (3.003 g, 7.174 mmol, 94 %).

<sup>1</sup>H (300.13 MHz, 298 K, C<sub>6</sub>D<sub>6</sub>, C<sub>6</sub>D<sub>5</sub>H at 7.15 ppm): 6.74 (s, 4H, *o*-H), 6.49 (s, 2H, *p*-H), 2.12 (s, 12H, *m*-CH<sub>3</sub>), 0.06 (s, 18H, TMS).

<sup>13</sup>C{<sup>1</sup>H} (100.64 MHz, 298 K, C<sub>6</sub>D<sub>6</sub> solvent signal at 128.0 ppm): 197.2 (C-Li), 170.8 (Xy-C), 149.7 (*m*-C<sub>ar</sub> or *ipso*-C<sub>ar</sub>), 136.1 (*m*-C<sub>ar</sub> or *ipso*-C<sub>ar</sub>), 126.7 (two signals superimposed, *p*-C<sub>ar</sub> and *o*-C<sub>ar</sub>), 21.3 (*m*-CH<sub>3</sub>), 0.8 (TMS).

<sup>7</sup>Li{<sup>1</sup>H} (116.64 MHz, 298 K, C<sub>6</sub>D<sub>6</sub>): 2.13.

**Elemental Analysis:** (C<sub>26</sub>H<sub>36</sub>Li<sub>2</sub>Si<sub>2</sub>) calcd C 74.60, H 8.67, Li 3.32, Si 13.42, observed C 73.67, H 8.90.

**LIFDI-MS:** calcd exact mass: 418.3 m/z, observed m/z: 407.7 (protonated butadiene).

## Synthesis and Analytical Data

### Compound 1

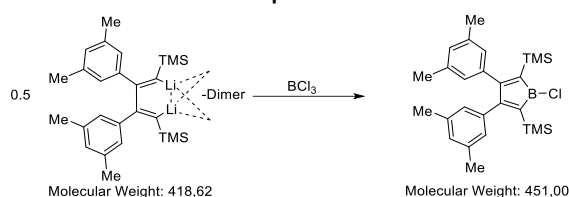

A 500 mL Schlenk-flask was charged with dilithio butadiene (3.212 g, 7.67 mmol, 1 eq.) and hexane (250 mL, SPS grade) and the dark red solution was cooled to 0 °C. A stock solution of boron trichloride (7.7 mL, 1 M in hexane, 1 eq.) was further diluted with additional hexane (90 mL) and subsequently added dropwise over a period of 25 min to the vigorously stirred red solution which then quickly turns into an orange suspension. After the addition was completed, the dark red suspension was stirred over night at room temperature. The solvent was removed under reduced pressure and thoroughly dried under vacuum and the flask containing an orange brown solid was transferred into a glovebox. The residue was again suspended in hexane (15 mL, distilled) and filtered through a syringe filter equipped with a thin plug of glass fiber (Whatman GF/B). Few drops of diethyl ether were added to the dark red filtrate which was then stored at -35 °C over night upon which a thick sponge of fine crystal needles of the Et<sub>2</sub>O-adduct to chloroborole **1** form. The sponge of fine crystals was isolated by filtration and washed with small portions of cold (-35°C) pentane. The mother liquors were then again cooled to -35 °C with another drop of diethyl ether for a further crop of crystals. This process was repeated until no worthwhile amount of crystalline material could be isolated. The combined crystalline yields were then dissolved hexane and solvents/volatiles were subsequently removed to eliminate coordinating ether by co-evaporation. In case ether was not entirely removed, the residue was again dissolved in hexane and the co-evaporation repeated. The chloroborole **1** is finally obtained as a deep red crystalline material (1.605 g, 3.56 mmol, 46 %).

**Note: (1)** In our hands chloroborole **1** did not crystallize reliably or in satisfactory yields from crude reaction mixtures and only the detour of isolating the ether adduct for an initial purification yields satisfactory access. Sometimes addition of Et<sub>2</sub>O for crystallization purposes lead to an instant precipitation of crystalline material. **(2)** In our attempts to increase the yield we noted a distinct dependency on concentrations of the solutions with more dilute solutions leading to higher yields. However, further extensive further dilution from the conditions described above did not result in improvements.

### Analytical Data for Compound 1

#### NMR:

<sup>1</sup>H (300.13 MHz, 298 K, C<sub>6</sub>D<sub>6</sub>, C<sub>6</sub>D<sub>5</sub>H at 7.15 ppm): 6.56 (m, 2H, *p*-H), 6.55 (m, 4H, *o*-H), 1.96 (m, 12H, *m*-CH<sub>3</sub>), 0.15 (s, 18H, TMS).

<sup>13</sup>C{<sup>1</sup>H} (100.64 MHz, 298 K, C<sub>6</sub>D<sub>6</sub> solvent signal at 128.0 ppm): 181.3 (C<sub>β</sub>), 139.3 (*ipso*-C<sub>ar</sub>), 136.6 (*m*-C<sub>ar</sub>), 135.4 (C<sub>α</sub>), 129.5 (*p*-C<sub>ar</sub>), 126.1 (*o*-C<sub>ar</sub>), 21.1 (*m*-CH<sub>3</sub>), 1.0 (TMS).

<sup>29</sup>Si-INEPT (79.49 MHz, 298 K, C<sub>6</sub>D<sub>6</sub>): -8.9.

<sup>11</sup>B (128.37 MHz, 298 K, C<sub>6</sub>D<sub>6</sub>): 69.6 (ω<sub>1/2</sub> = 910 Hz).

**Elemental Analysis:** (C<sub>26</sub>H<sub>36</sub>BClSi<sub>2</sub>) calcd C 69.24, H 8.05, B 2.40, Cl 7.86, Si 12.45, observed C 68.89, H 8.31.

**LIFDI-MS:** calcd exact mass: 450.2 m/z, observed m/z: 451.2 according to isotope pattern in agreement with hydrolysis product after chloride loss [M-Cl+2(H<sub>2</sub>O)]<sup>+</sup>, around m/z 882.3 further dimeric hydrolysis aggregates<sup>+</sup>.

**UV-vis:** λ<sub>max</sub> at 454 nm (hexane)

### Crystal structure of Compound 1

**1** crystallised from solutions in hexane in a freezer (−35°C). For further details on the diffraction measurement and refinement please see the respective section and the respective CIF-file.

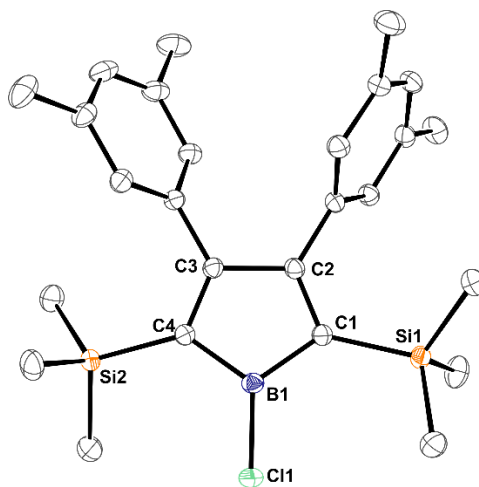

**ORTEP** plot of the molecular structure of **1**. Atomic displacement parameters are drawn at 50% probability level. Hydrogen atoms are omitted for the sake of clarity. Selected bond length in Å: B1-C1 1.576(1), C1-C2 1.360(2), C2-C3 1.536(1), C3-C4 1.363(2), C4-B1 1.577(2), B1-Cl1 1.757(1). The structure was deposited with the CCSD.

Spectra Plots for Compound 1

<sup>1</sup>H-NMR-spectrum of chloroborole 1 in C<sub>6</sub>D<sub>6</sub>  
# referenced to C<sub>6</sub>D<sub>5</sub>H at 7.15 ppm

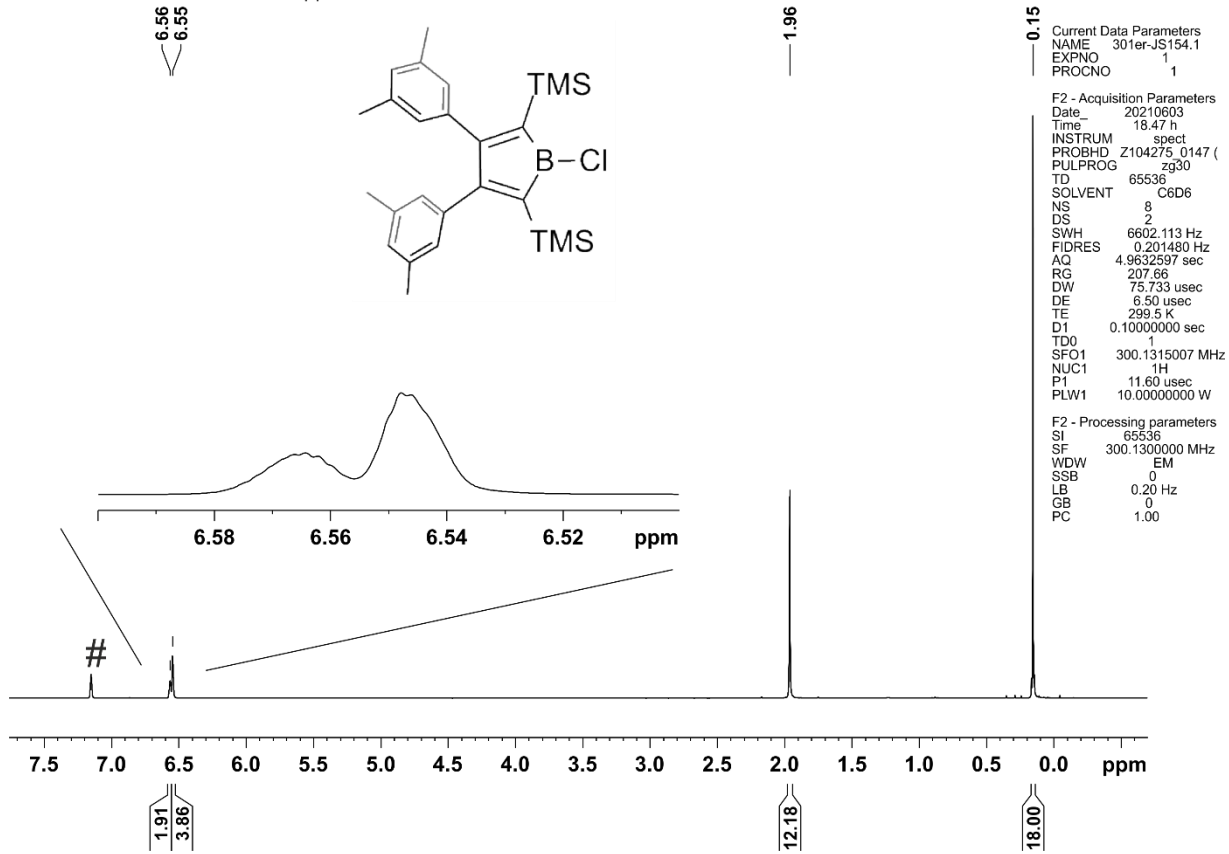

<sup>13</sup>C{<sup>1</sup>H}-NMR-spectrum of chloroborole 1 in C<sub>6</sub>D<sub>6</sub>  
# referenced to C<sub>6</sub>D<sub>6</sub> at 128.0 ppm

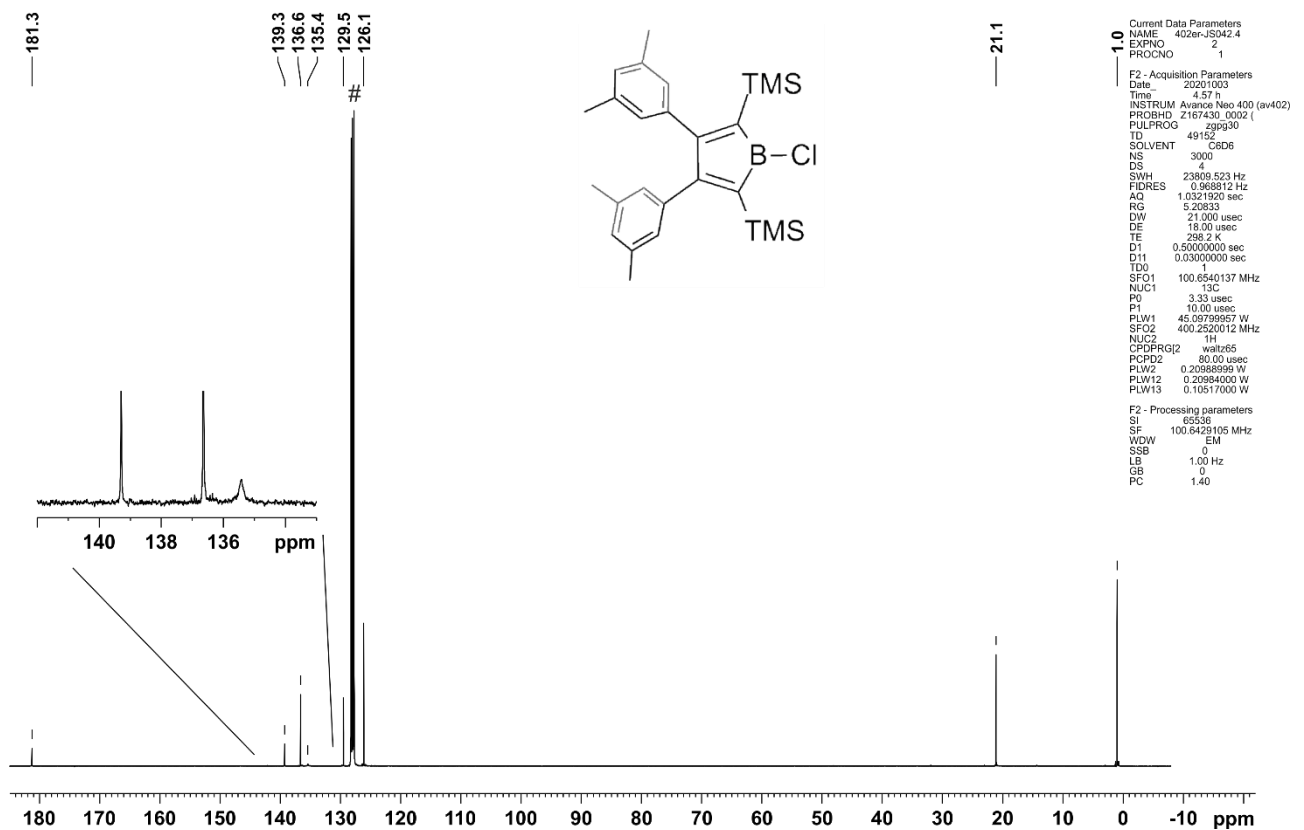

<sup>11</sup>B(background suppressed)-NMR spectrum of chloroborole **1** in C<sub>6</sub>D<sub>6</sub>

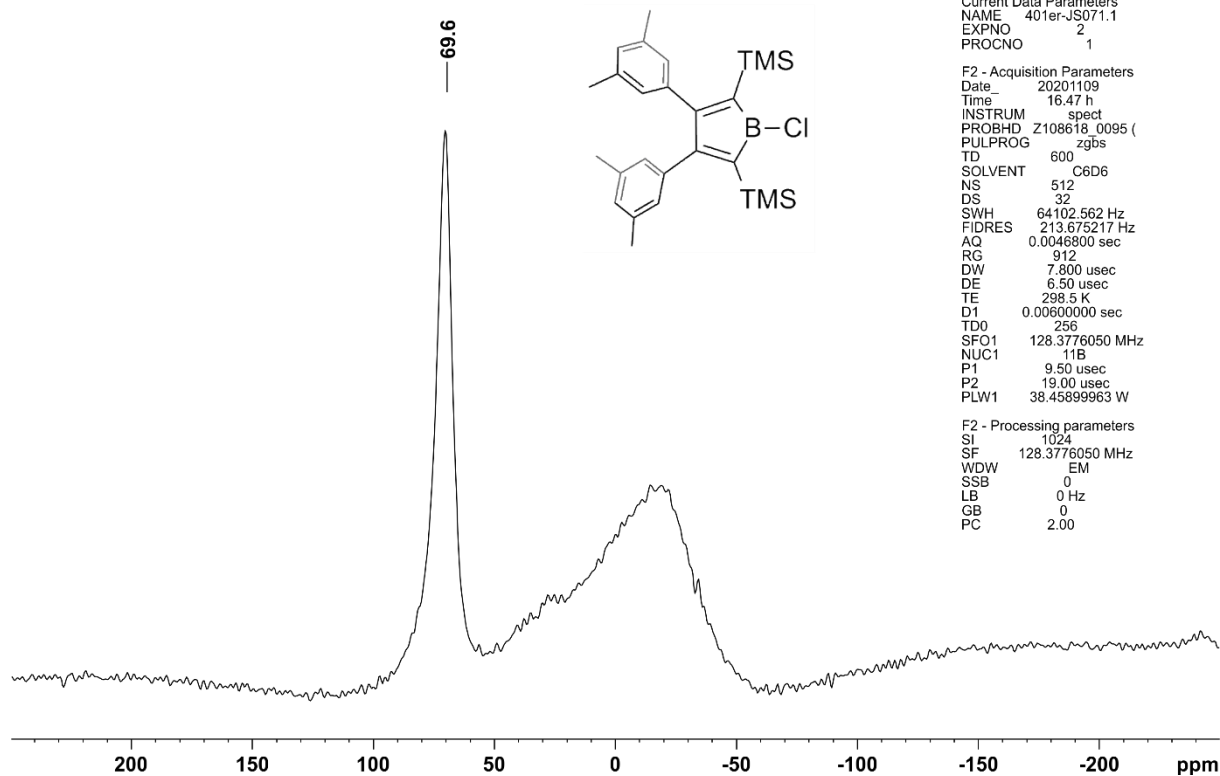

<sup>29</sup>Si-INEPT-NMR spectrum of chloroborole **1** in C<sub>6</sub>D<sub>6</sub>

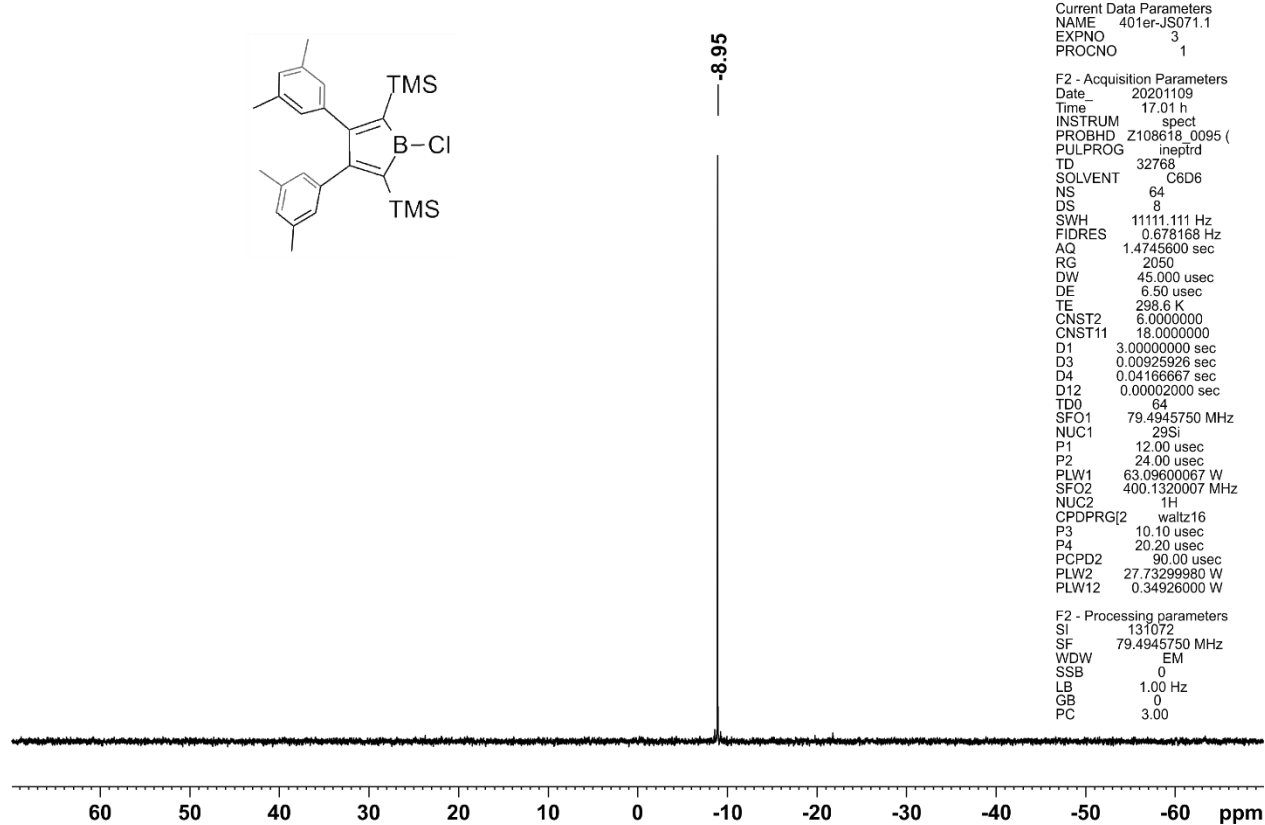



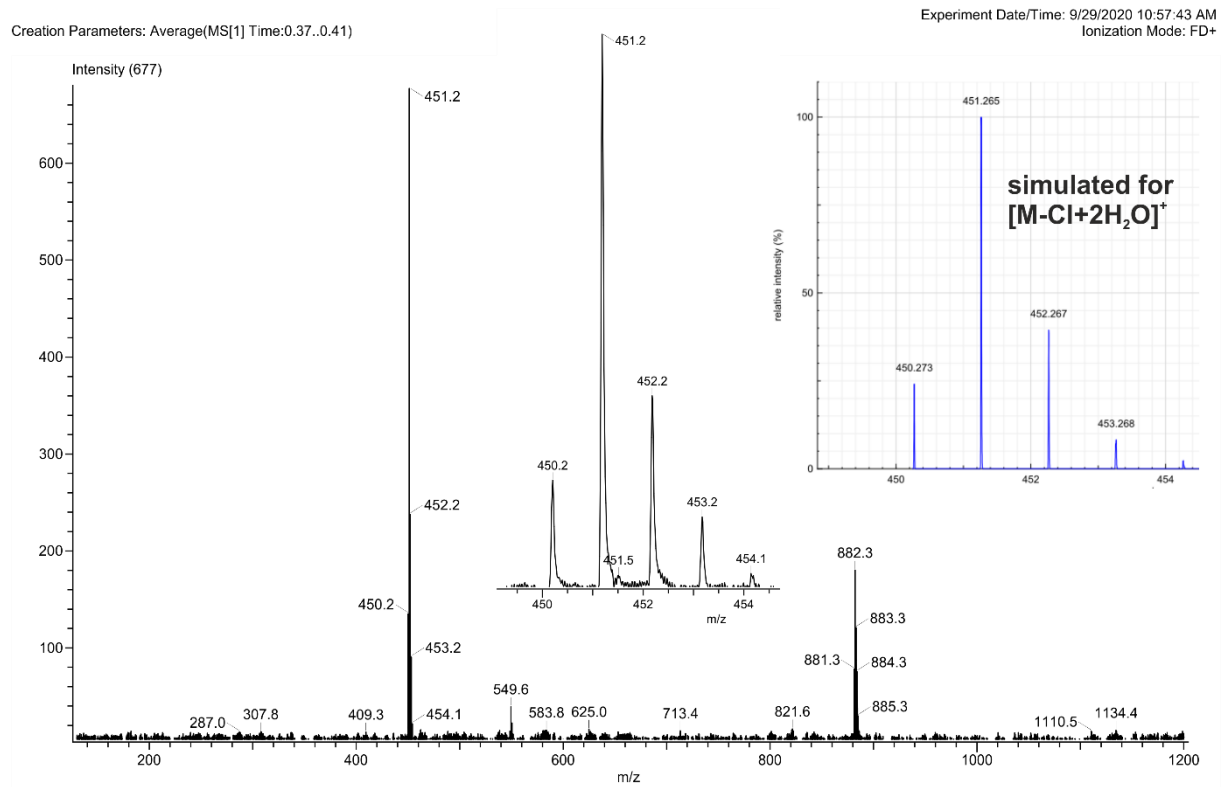

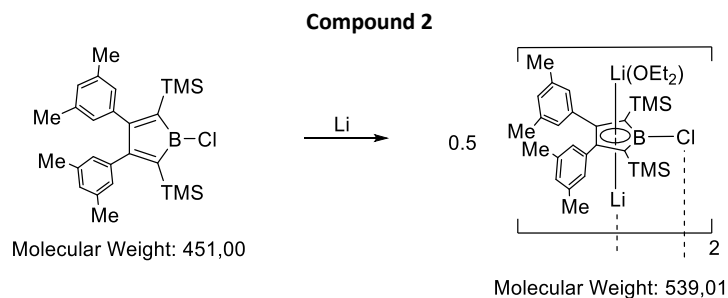

In a glove box, lithium chips were freshly rolled out and some of the resulting flakes of thin Li-foil (12.1 mg, 1.76 mmol, 2.1 equiv.) were added into a red solution of chloroborole **1** (396.8 mg, 0.880 mmol, 1 equiv.) in diethyl ether (10 mL, distilled) and the mixture was then stirred over night at ambient temperature. The ether was removed from the brown suspension under reduced pressure and the brown residue was suspended in toluene (2 mL, distilled). The suspension was subsequently filtered through a syringe filter equipped with a thin plug of glass fiber (Whatman GF/B), and the filter was rinsed with additional toluene (1 mL). The toluene was removed in vacuo and the brown residue was then washed with small amounts of pentane until the residue turns into a slightly yellowish powder, which was subsequently dried under reduced pressure to give the ether solvate of lithium borole diide (213.5 mg, 0.396 mmol, 45 %). Crystals can be obtained from toluene.

**Note:** When thoroughly dried the dimeric adduct with one molecule of ether per borole diide is reliably obtained. When drying to short, the products contain between 1 and 2 equiv. of ether per borole, which affects on the NMR chemical shifts.

#### Analytical Data for Compound 2

**NMR:**

$^1\text{H}$  (400.13 MHz, 298 K,  $\text{C}_6\text{D}_6$ ,  $\text{C}_6\text{D}_5\text{H}$  at 7.15 ppm): 6.59 (s, 6H, *o-H* and *p-H*, superimposed), 3.10 (q,  $^3J_{\text{H,H}} = 7.1$  Hz, 8H,  $\text{OCH}_2\text{CH}_3$ ), 2.10 (s, 12H, *m-CH}\_3*), 0.91 (t,  $^3J_{\text{H,H}} = 7.1$  Hz, 12H,  $\text{OCH}_2\text{CH}_3$ ), 0.38 (s, 18H, TMS).

$^{13}\text{C}\{^1\text{H}\}$  (100.64 MHz, 298 K,  $\text{C}_6\text{D}_6$  solvent signal at 128.0 ppm): 143.4 (*ipso-C}\_{ar}*), 135.8 (*m-C}\_{ar}*), 130.0 (*o-C}\_{ar}* or *p-C}\_{ar}*), ca. 128.0 ( $\text{C}_\theta$ , superimposed by solvent signal), 126.3 (*o-C}\_{ar}* or *p-C}\_{ar}*), 99.4 ( $\text{C}_\alpha$ ), 66.3 ( $\text{OCH}_2\text{CH}_3$ ), 21.4 (*m-CH}\_3*), 14.7 ( $\text{OCH}_2\text{CH}_3$ ), 4.3 (TMS).

$^7\text{Li}\{^1\text{H}\}$  (116.64 MHz, 298 K,  $\text{C}_6\text{D}_6$ ): -6.9.

$^{11}\text{B}$  (128.37 MHz, 298 K,  $\text{C}_6\text{D}_6$ ): 31.6 ( $\omega_{1/2} = 438$  Hz).

$^{29}\text{Si-INEPT}$  (79.49 MHz, 298 K,  $\text{C}_6\text{D}_6$ ): (79.49 MHz, 298 K,  $\text{C}_6\text{D}_6$ ): -12.16.

**Elemental Analysis:** ( $\text{C}_{30}\text{H}_{46}\text{BClLi}_2\text{OSi}_2$ ) calcd C 66.85, H 8.60, B 2.01, Cl 6.58, Li 2.58, O 2.97, Si 10.42, observed C 66.87, H 8.99.

### Crystal structure of Compound 2

**2** crystallised from solutions in toluene in a freezer (−35°C). For further details on the diffraction measurement and refinement please see the respective section and the respective CIF-file.

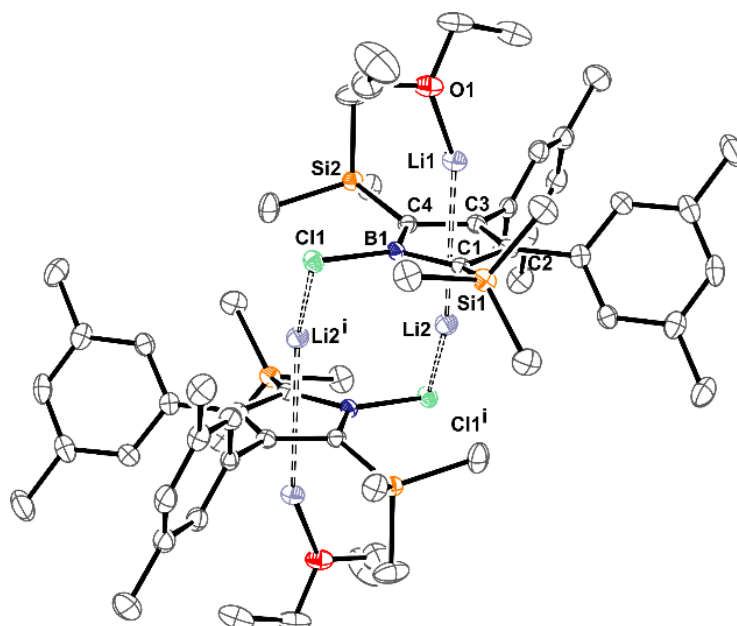

**ORTEP** of the solid state molecular structure of the dimeric aggregate  $[\text{Li}_2(\text{OEt}_2)][\mathbf{2}]$ . ADP drawn at 50% probability. Hydrogen atoms are omitted for clarity. Selected bond lengths in Å: B1–Cl1 1.868(2), Li2–Cl1' 2.373(3), Li1–Ct 1.825, Li2–Ct 1.854 and Table 1 of the manuscript. The structure was deposited with the CCSD.

### Spectra Plots for Compound 2

<sup>1</sup>H-NMR-spectrum of compound **2** in C<sub>6</sub>D<sub>6</sub>  
# referenced to C<sub>6</sub>D<sub>5</sub>H at 7.15 ppm

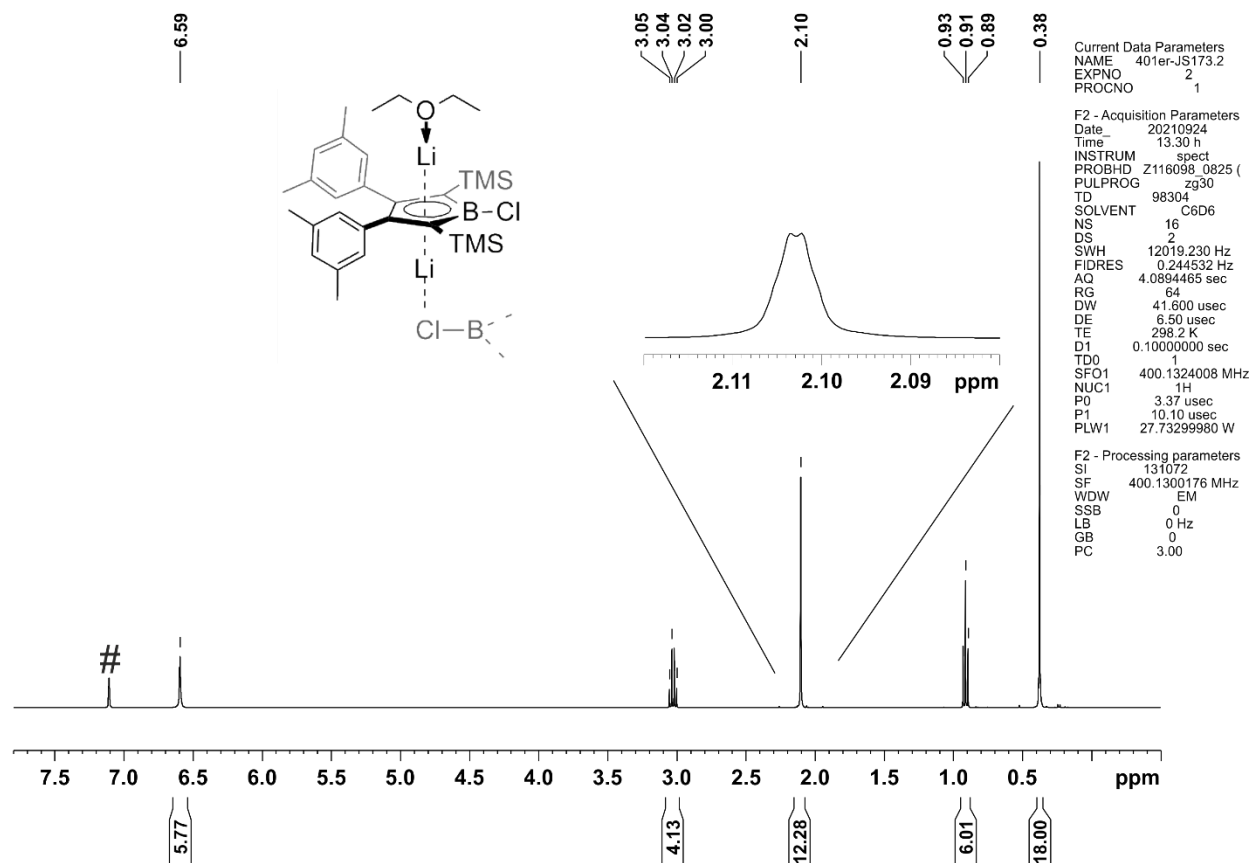

<sup>13</sup>C{<sup>1</sup>H}-NMR-spectrum of compound **2** in C<sub>6</sub>D<sub>6</sub>  
# referenced to C<sub>6</sub>D<sub>6</sub> at 128.0 ppm

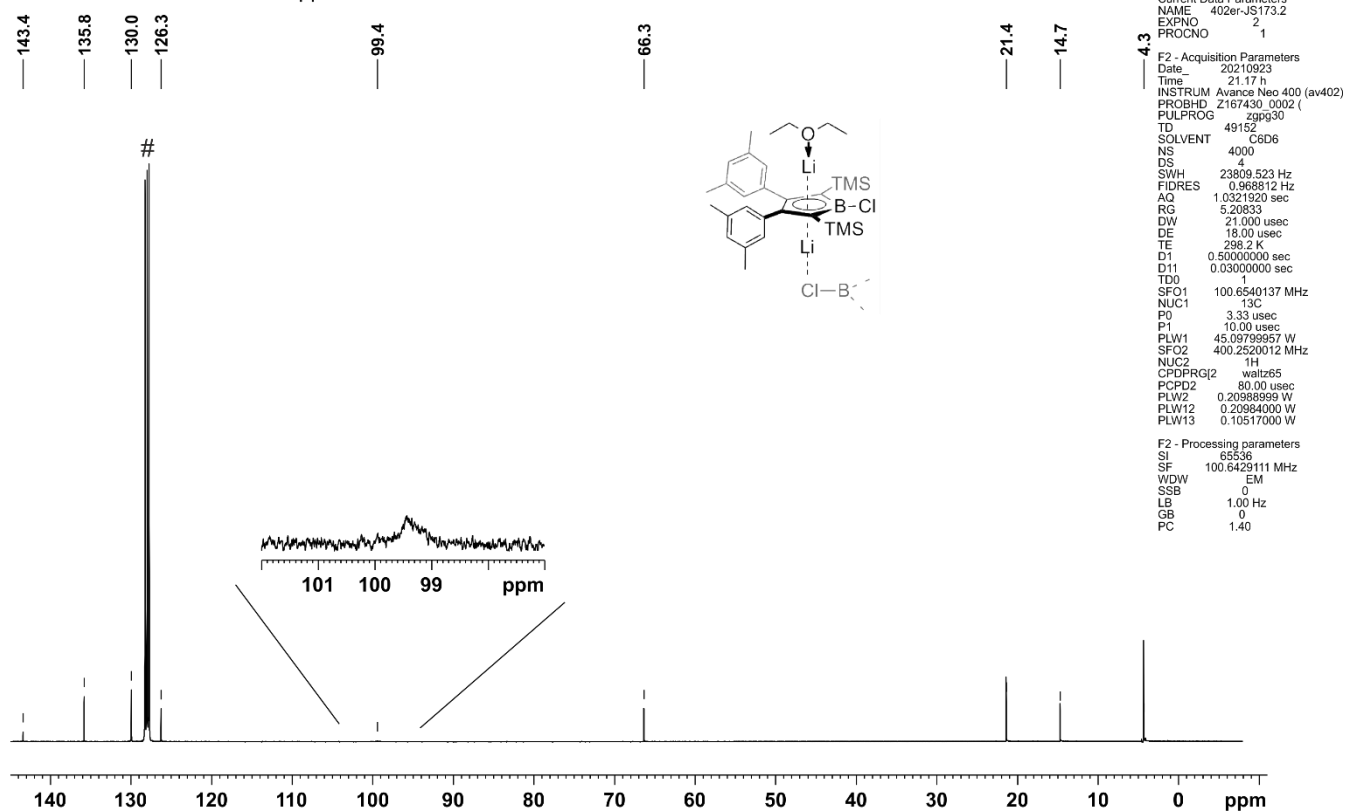

<sup>11</sup>B-NMR spectrum (background suppressed) of compound **2** in C<sub>6</sub>D<sub>6</sub>

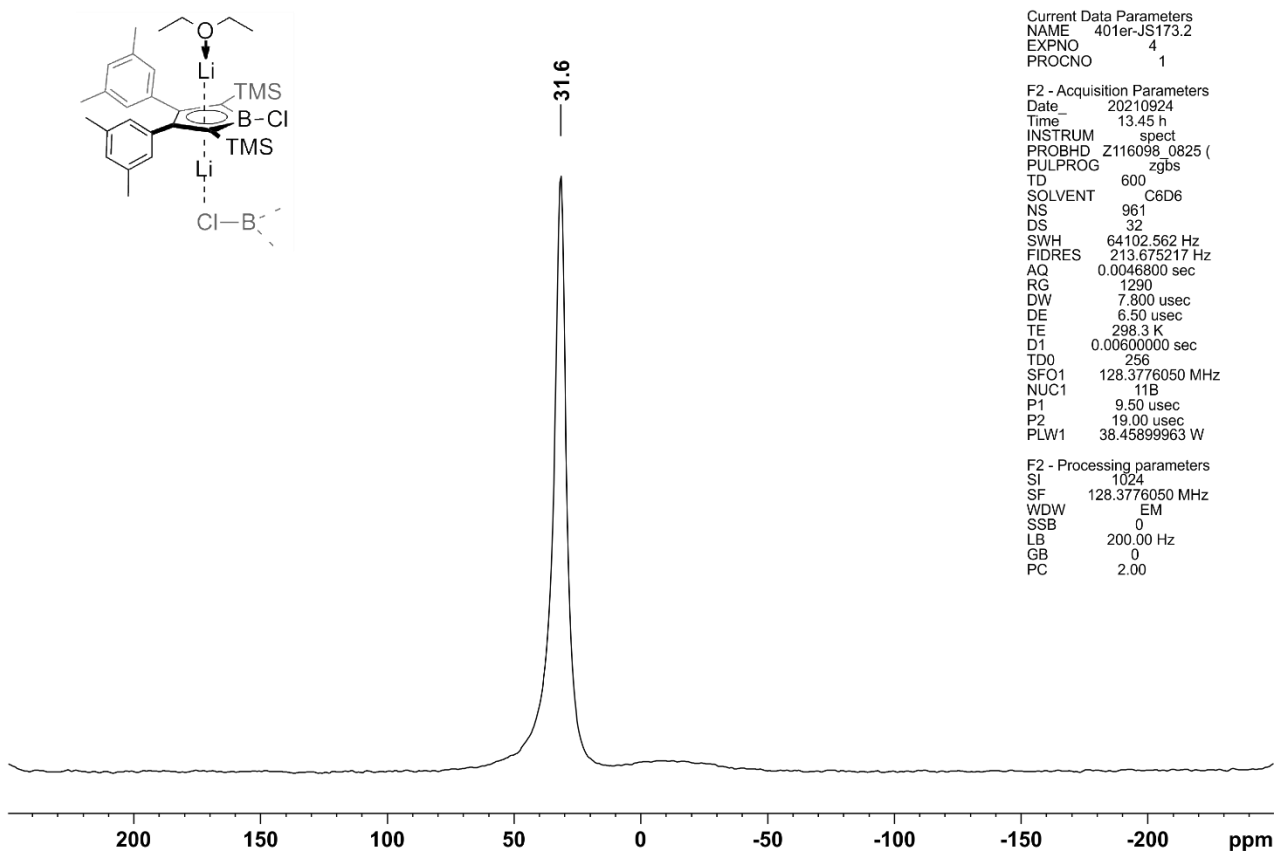

7Li-NMR-spectrum of compound 2 in C6D6

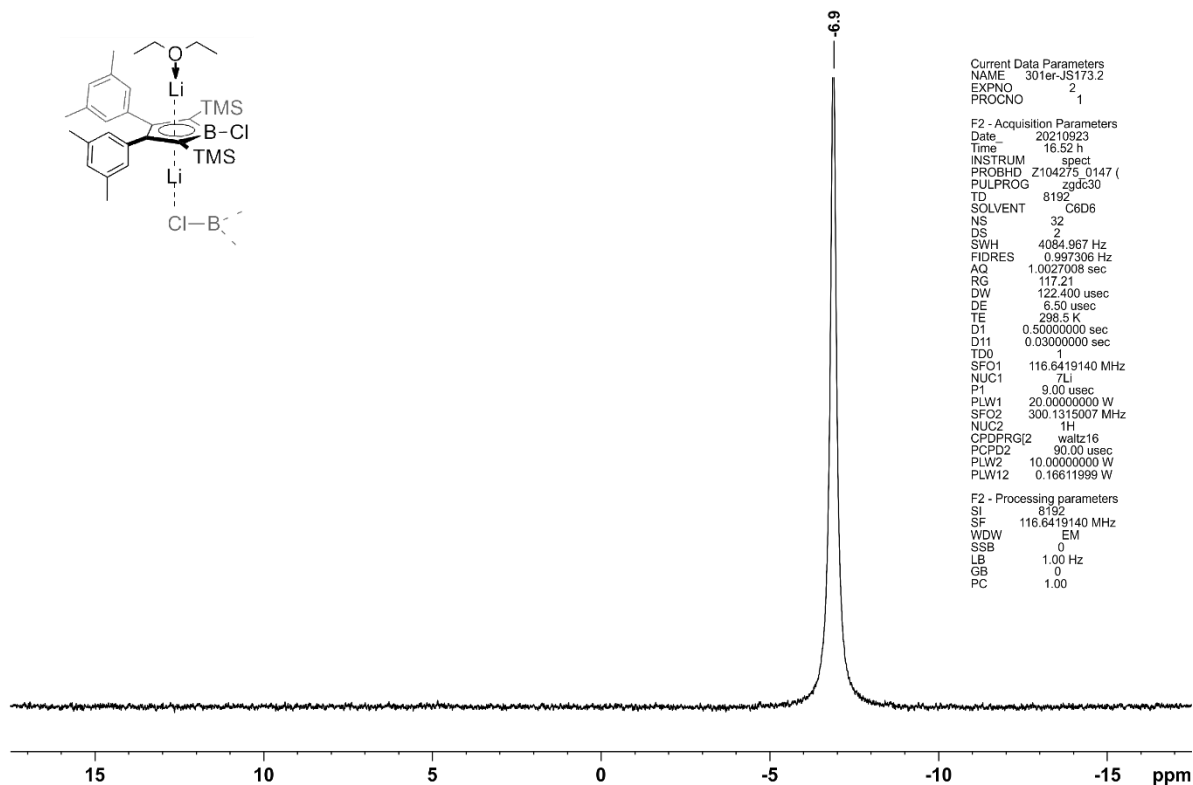

29Si-INEPT-NMR spectrum of compound 2 in C6D6

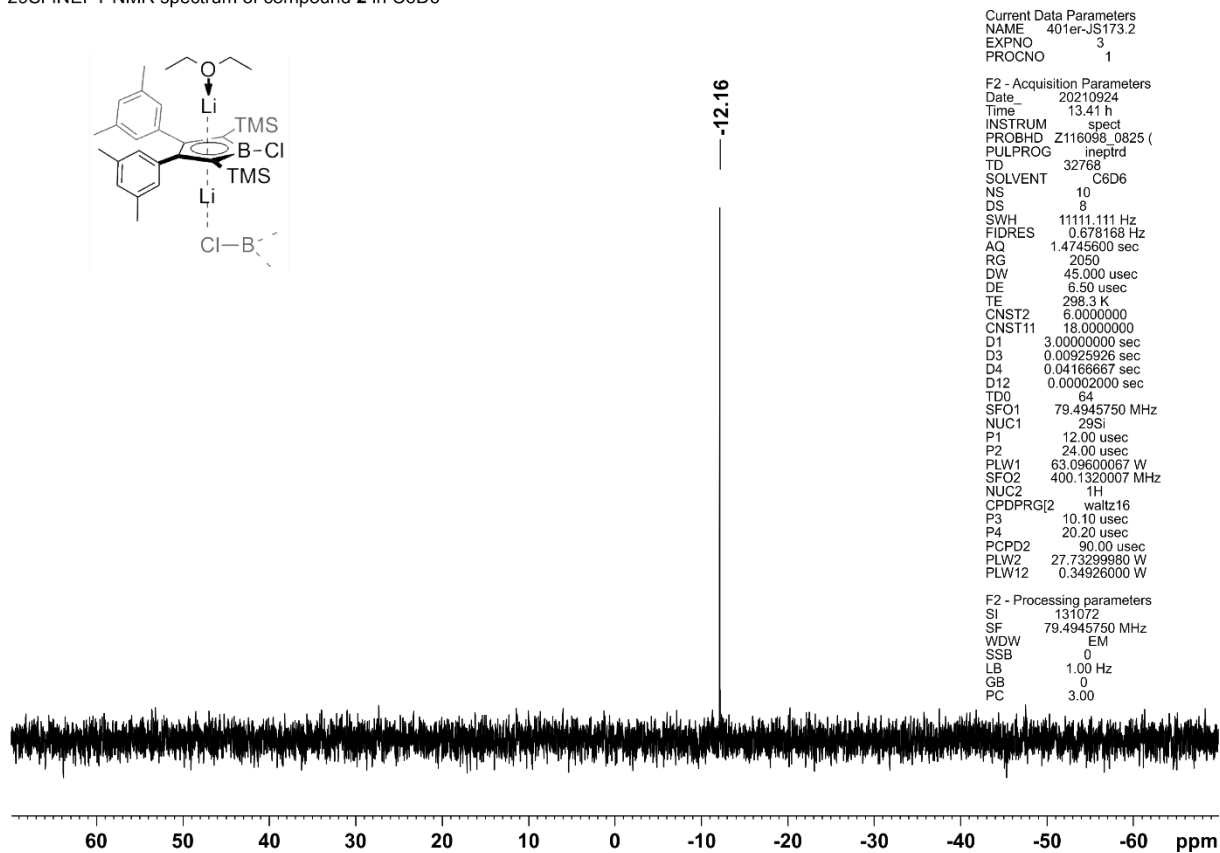

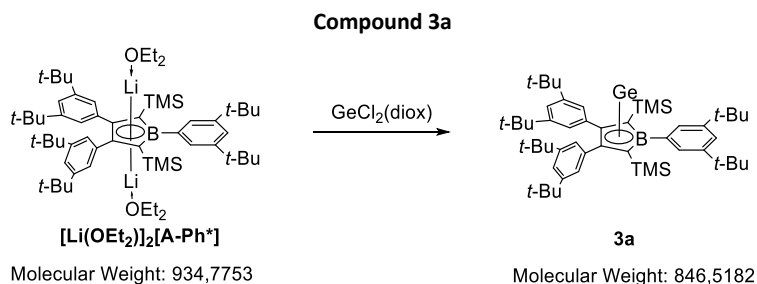

In a glovebox, compound **[Li(OEt<sub>2</sub>)<sub>2</sub>][A-Ph\*]** (50.3 mg, 0.054 mmol, 1 eq) was dissolved in dry and degassed diethyl ether (1 mL). This solution was added to a suspension of GeCl<sub>2</sub>·1,4-dioxane (12.5 mg, 0.054 mmol, 1 eq) in dry and degassed diethyl ether (1.5 mL). The suspension was stirred for ten minutes at ambient temperature and the solvent of the reaction mixture was afterwards removed under reduced pressure. The resulting solid was extracted with dry and degassed hexane (1 x 1 mL, 2 x 0.5 mL) and the solvent of the colourless extract was once again removed under reduced pressure. Compound **3a** (43.8 mg, 0.052 mmol, 96 %) was obtained as a colourless solid in a purity of approximately 95 % according to NMR analysis.

**Note:** Further purification by means of quantitative crystallization remained unsuccessful due to the high solubility of compound **3a**. Crystals suitable for x-ray crystallography were grown from a saturated hexane solution by slow evaporation of the solvent at ambient temperature.

#### Analytical Data for Compound 3a

##### NMR:

<sup>1</sup>H (400.13 MHz, 298 K, C<sub>6</sub>D<sub>6</sub>, CD<sub>5</sub>H at 7.15 ppm): 7.68 (d, <sup>4</sup>J<sub>HH</sub> = 1.9 Hz, 2H, *o*-H<sub>ar1</sub>), 7.48 (t, <sup>4</sup>J<sub>HH</sub> = 1.9 Hz, 1H, *p*-H<sub>ar1</sub>), 7.21 (t, <sup>4</sup>J<sub>HH</sub> = 1.8 Hz, 2H, *p*-H<sub>ar3,4</sub>), 7.12 (d, <sup>4</sup>J<sub>HH</sub> = 1.8 Hz, 4H, *o*-H<sub>ar3,4</sub>), 1.43 (s, 36H, Ar<sub>1</sub>-C(Me)<sub>3</sub>), 1.15 (s, 36H, Ar<sub>3,4</sub>-C(Me)<sub>3</sub>), -0.02 (s, 18H, Si(Me)<sub>3</sub>).

<sup>13</sup>C{<sup>1</sup>H} (100.65 MHz, 298 K, C<sub>6</sub>D<sub>6</sub>, solvent signal at 128.0 ppm): 150.1 (*m*-C<sub>ar3,4</sub>), 148.8 (*m*-C<sub>Ar1</sub>), 142.5 (*ipso*-C<sub>ar1</sub>), 141.8 (*borole*-C<sub>3,4</sub>), 136.3 (*ipso*-C<sub>ar3,4</sub>), 129.6 (*o*-C<sub>ar1</sub>), 126.8 (br, *o*-C<sub>ar3,4</sub>), 120.7 (*p*-C<sub>ar3,4</sub>), 119.6 (*p*-C<sub>ar1</sub>), 113.2 (*borole*-C<sub>2,5</sub>), 34.9 (Ar<sub>1</sub>-C(CH<sub>3</sub>)<sub>3</sub>), 34.7 (Ar<sub>3,4</sub>-C(CH<sub>3</sub>)<sub>3</sub>), 31.9 (Ar<sub>1</sub>-C(CH<sub>3</sub>)<sub>3</sub>), 31.5 (Ar<sub>3,4</sub>-C(CH<sub>3</sub>)<sub>3</sub>), 2.3 (Si(CH<sub>3</sub>)<sub>3</sub>).

<sup>11</sup>B (128.38 MHz, 298 K, C<sub>6</sub>D<sub>6</sub>): 30.2.

<sup>29</sup>Si (99.37 MHz, 298 K, C<sub>6</sub>D<sub>6</sub>): (79.49 MHz, 298 K, C<sub>6</sub>D<sub>6</sub>): -7.4.

**Elemental Analysis:** C<sub>52</sub>H<sub>81</sub>BSi<sub>2</sub>Ge calcd C 73.84, H 9.65; observed C 74.49, H 10.25.

**LIFDI-MS:** calcd exact mass: 846.5 m/z; observed m/z: 846.3 [M]<sup>+</sup>.

#### Crystal structure of Compound 3a

A few crystals of **3a** suitable for X-ray diffraction were isolated from evaporation of hexane solutions. For further details on the diffraction measurement and refinement please see the respective section and the respective CIF-file.

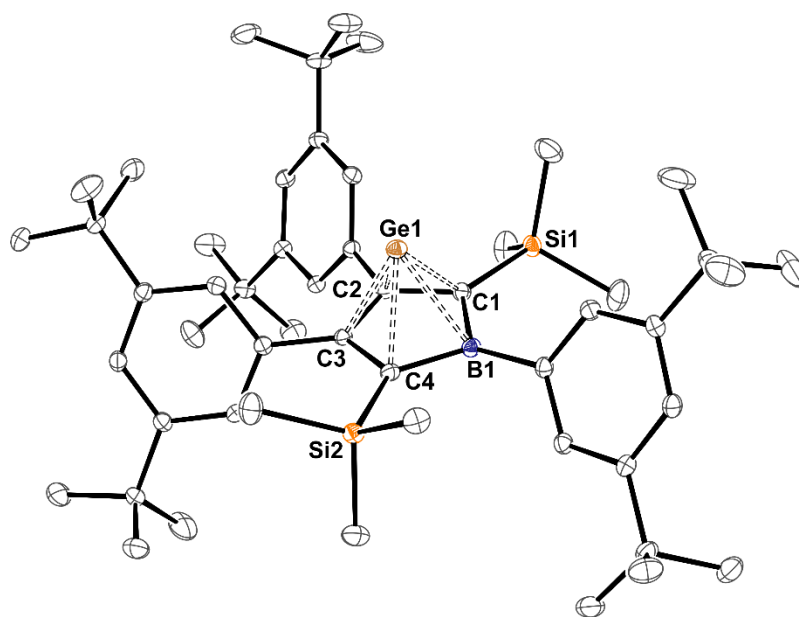

**ORTEP** plot of the molecular structure of **3a**. Atomic displacement parameters are drawn at 50% probability level. Hydrogen atoms and a lattice hexane molecule have been omitted for the sake of clarity. Selected bond length: B1–C1 1.560(2), C1–C2 1.460(2), C2–C3 1.439(1), C3–C4 1.460(2), C4–B1 1.559(2), B1–Ge1 2.272(1), C1–Ge1 2.211(1), C2–Ge1 2.193(1), C3–Ge1 2.205(1), C4–Ge1 2.206(1).

Spectra Plots for Compound 3a

<sup>1</sup>H-NMR-spectrum of 3a in C6D6  
# referenced to C6D5H at 7.15 ppm

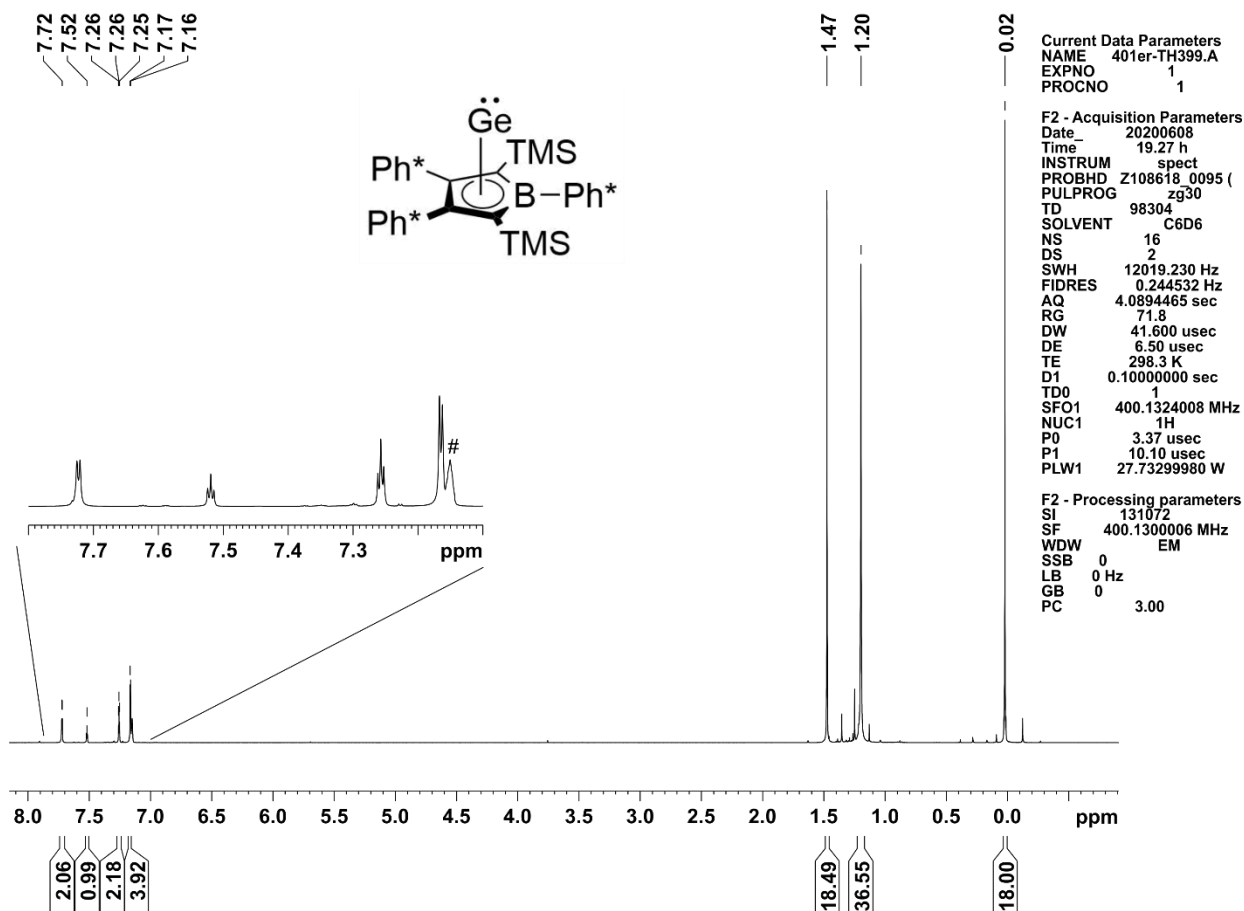

<sup>13</sup>C{<sup>1</sup>H}-NMR-spectrum of 3a in C6D6  
# referenced to C6D6 at 128.0 ppm

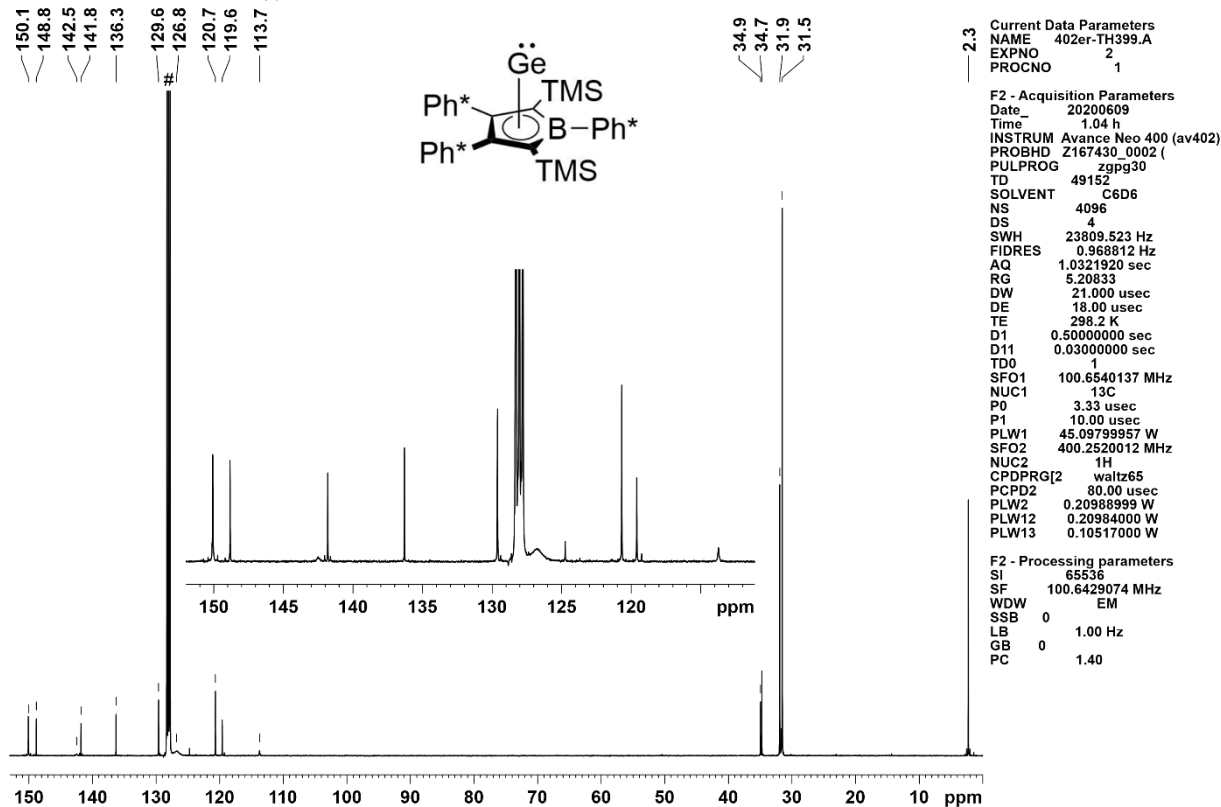



11B-NMR spectrum (background suppressed) of **3a** in C6D6

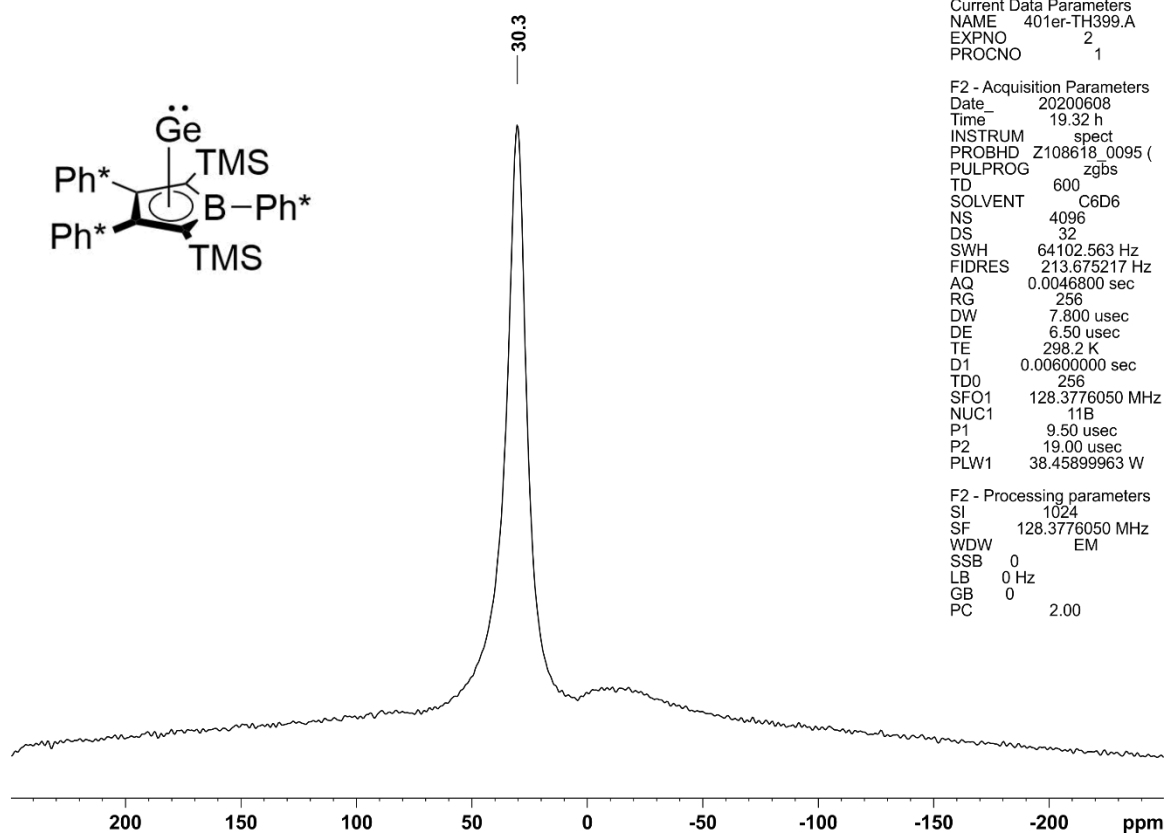

29Si-INEPT-NMR spectrum of **3a** in C6D6

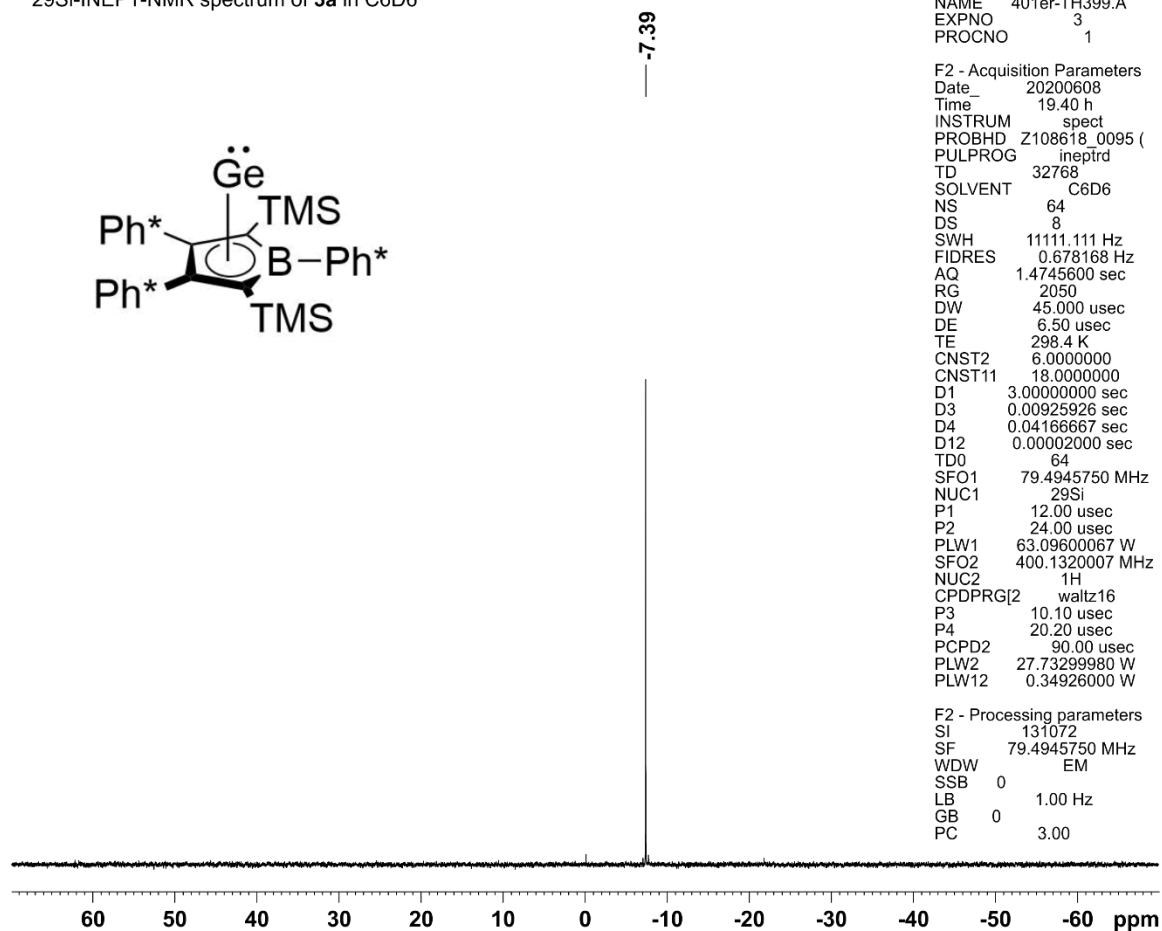

### LIFDI-MS of compound 3a

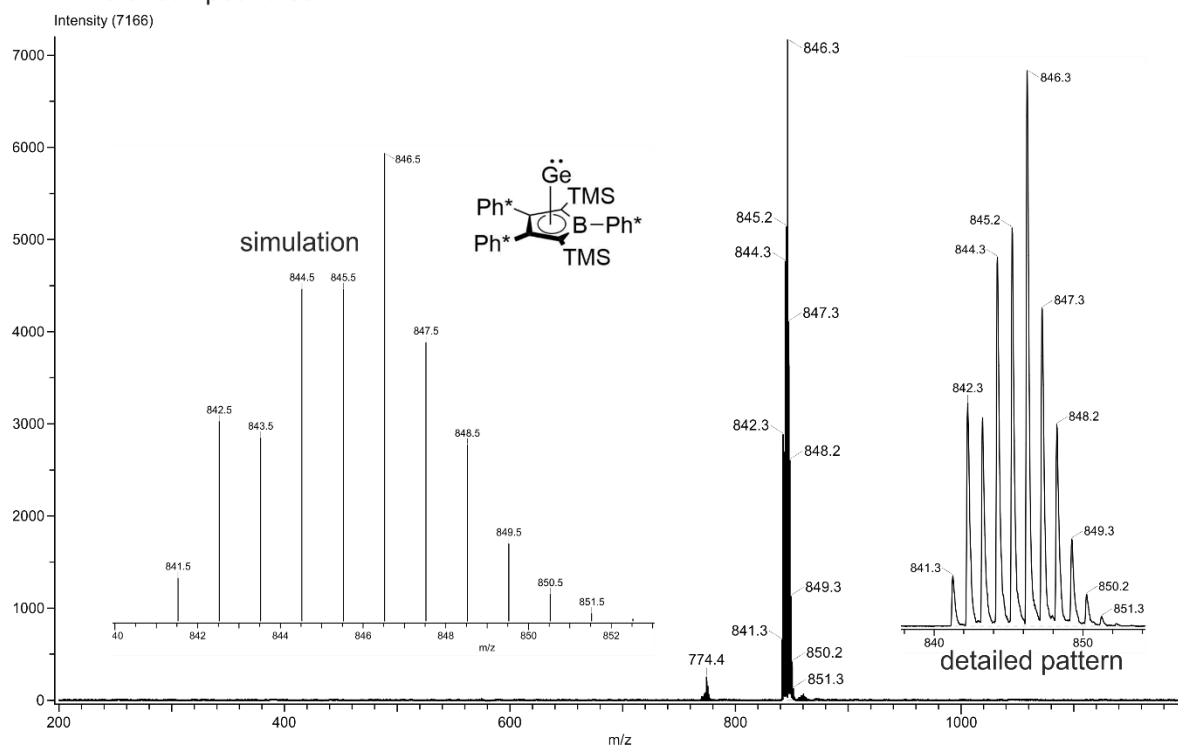

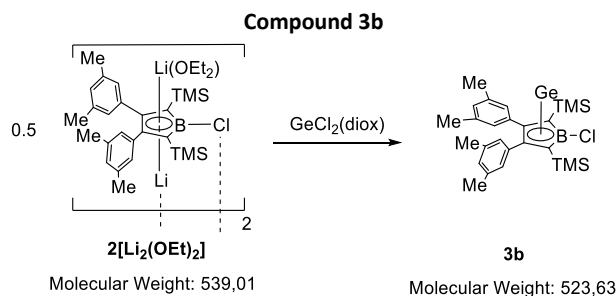

In a glovebox, a solution of  $\text{GeCl}_2$ -dioxane (168.7 mg, 0.729 mmol, 1 equiv.) in diethyl ether (6 mL) was added to a solution of boroleidiide **2** (431.0 mg, 0.800 mmol, 1.1 equiv.) in diethyl ether (3 mL) at ambient temperature. The resulting beige suspension was stirred at ambient temperature overnight. The ether was removed in vacuo to give a beige solid. The solid was subsequently suspended two times in hexane (10 mL, 5 mL) and volatiles are thoroughly removed in vacuo to co-evaporate 1,4-dioxane. The solid was again suspended in hexane (10 mL) and filtered through a syringe filter equipped with a thin plug of glass fiber (Whatman GF/B), and the filter cake was washed with toluene (5 mL). The filtrate was carefully concentrated under reduced pressure until incipient crystallization to give slightly yellowish crystals which were isolated and washed with small portions of pentane to give the product **3b** (298.3 mg, 0.570 mmol, 79 %) after drying.

#### Analytical Data for Compound 3b

##### NMR:

$^1\text{H}$  (400.13 MHz, 298 K,  $\text{C}_6\text{D}_6$ ,  $\text{C}_6\text{D}_5\text{H}$  at 7.15 ppm): 6.81 (m, 4H, *o-H*), 6.47 (m, 2H, *p-H*) 1.93 (s, 12H, *m-CH*<sub>3</sub>), 0.19 (s, 18H, TMS).

$^{13}\text{C}\{^1\text{H}\}$  (100.64 MHz, 298 K,  $\text{C}_6\text{D}_6$  solvent signal at 128.0 ppm): 138.8 (*C*<sub>6</sub>), 136.9 (*m-C*<sub>ar</sub>), 135.5 (*ipso-C*<sub>ar</sub>), 130.1 (*o-C*<sub>ar</sub>), 129.5 (*p-C*<sub>ar</sub>), 106.6 (*C*<sub>α</sub>), 21.0 (*m-CH*<sub>3</sub>), 1.8 (TMS).

$^{11}\text{B}$  (128.37 MHz, 298 K,  $\text{C}_6\text{D}_6$ ): 29.2 ( $\omega_{1/2}$  = 580 Hz).

$^{29}\text{Si-INEPT}$  (79.49 MHz, 298 K,  $\text{C}_6\text{D}_6$ ): -7.03.

**Elemental Analysis:** ( $\text{C}_{26}\text{H}_{36}\text{BClSi}_2\text{Sn}$ ) calcd C 59.64, H 6.93, B 2.06, Cl 6.77, Ge 13.87, Si 10.73, observed C 59.60, H 6.89.

**LIFDI-MS:** calcd exact mass: 524.1 m/z, observed m/z: 524.6.

### Crystal structure of Compound **3b**

**3b** crystallised from hexane solutions in a freezer (−35°C). For further details on the diffraction measurement and refinement please see the respective section and the respective CIF-file.

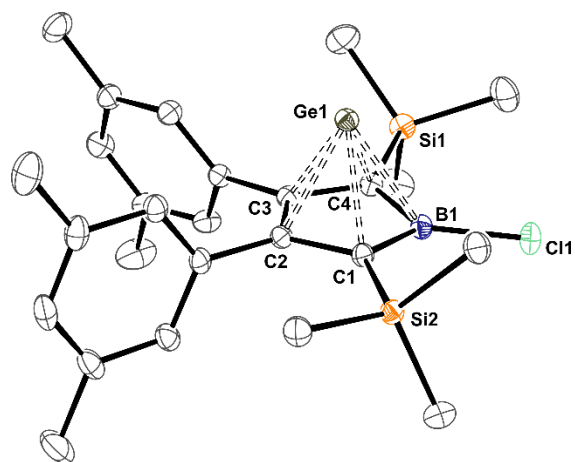

**ORTEP** plot of the molecular structure of **3b**. Atomic displacement parameters are drawn at 50% probability level. Hydrogen atoms have been omitted for the sake of clarity. The germanium vertex atom was modelled to occupy a minor fraction (ca. 2-3%) on the opposite side of the borole moiety and only the major contribution is shown. Selected bond length: B1–Cl1 1.801(1), B1–C1 1.534(2), C1–C2 1.457(2), C2–C3 1.434(2), C3–C4 1.464(2), C4–B1 1.535(2), B1–Ge1 2.297(1), C1–Ge1 2.224(1), C2–Ge1 2.204(1), C3–Ge1 2.211(1), C4–Ge1 2.225(1).

### Spectra Plots for Compound 3b

<sup>1</sup>H-NMR-spectrum of compound **3b** in C<sub>6</sub>D<sub>6</sub>  
# referenced to C<sub>6</sub>D<sub>5</sub>H at 7.15 ppm

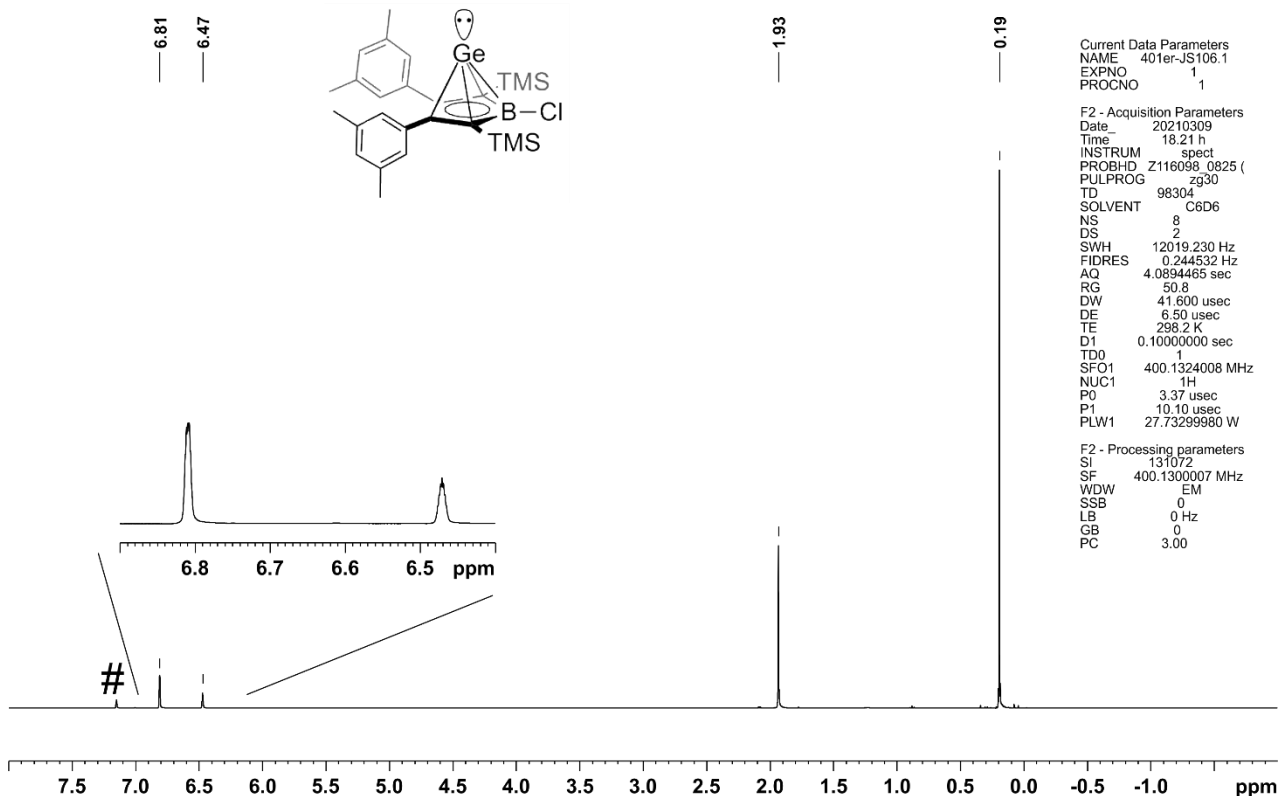

<sup>13</sup>C{<sup>1</sup>H}-NMR-spectrum of compound **3b** in C<sub>6</sub>D<sub>6</sub>  
# referenced to C<sub>6</sub>D<sub>6</sub> at 128.0 ppm

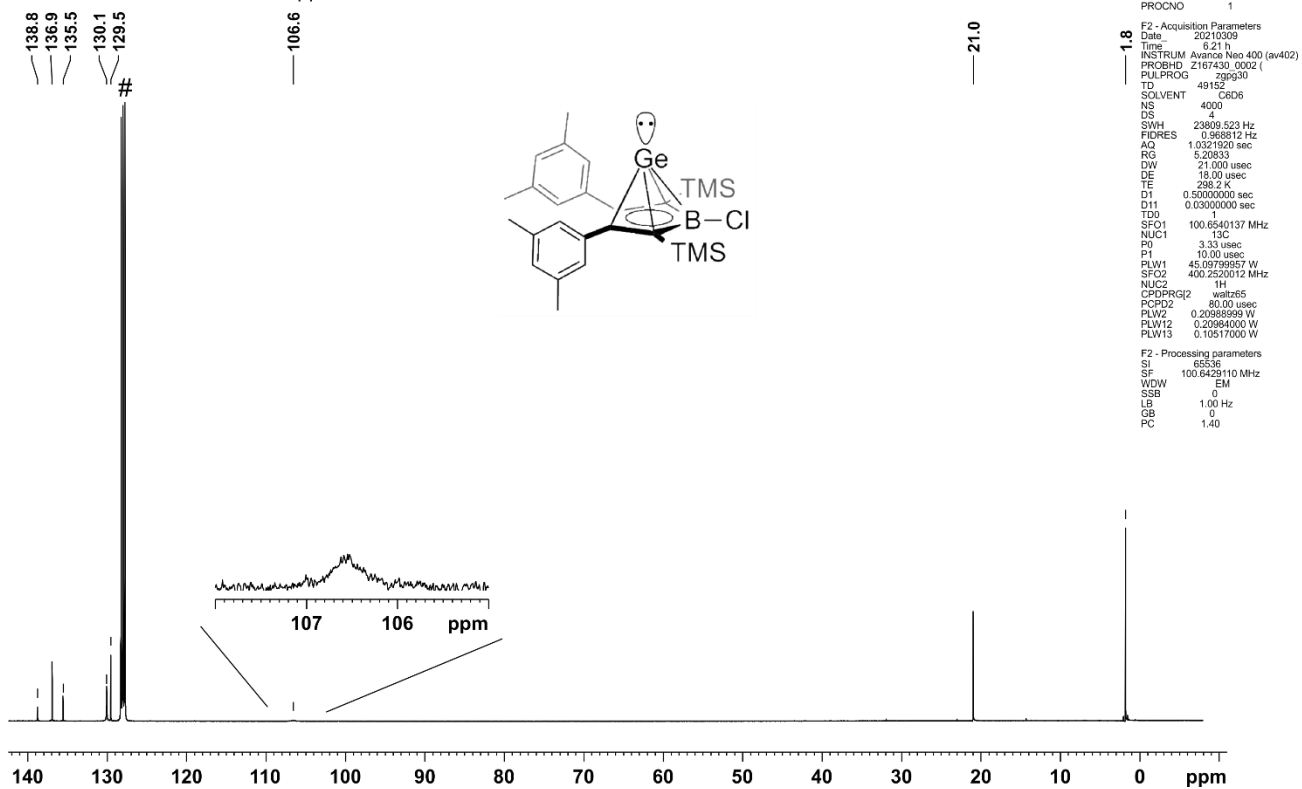

11B-NMR spectrum (background suppressed) of compound **3b** in C6D6

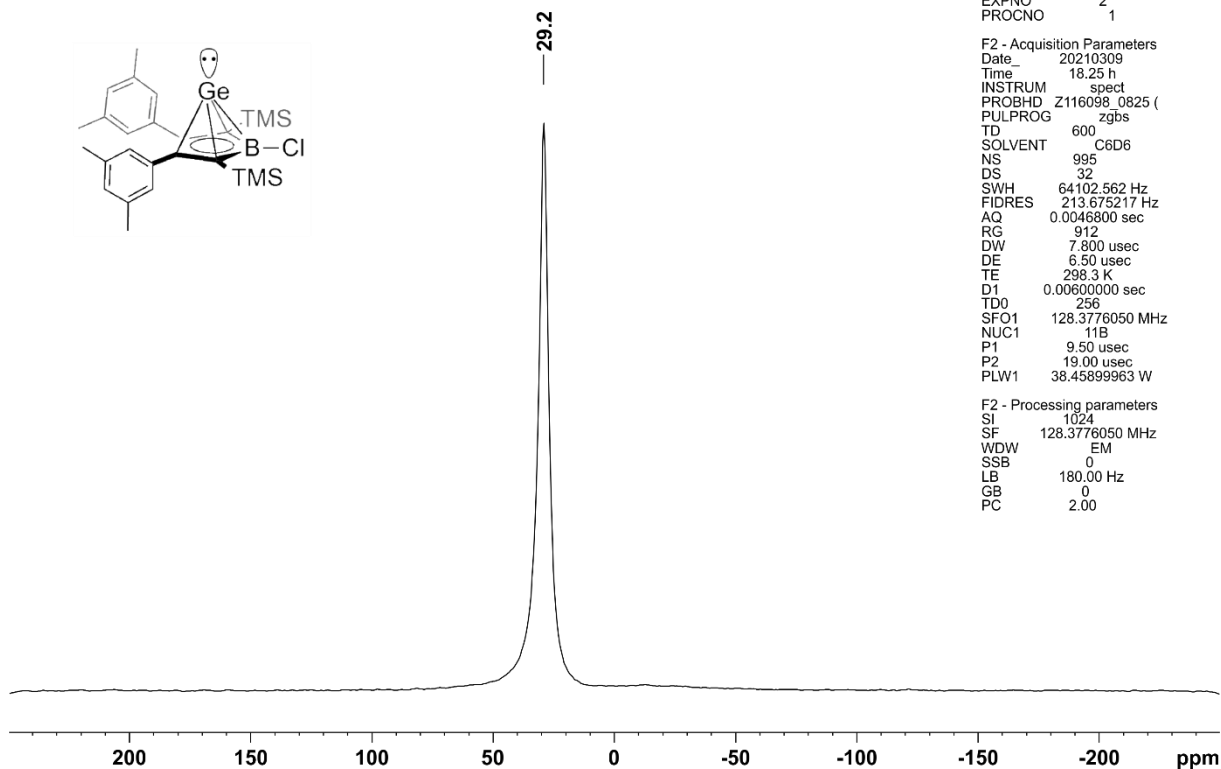

29Si-INEPT-NMR spectrum of compound **3b** in C6D6

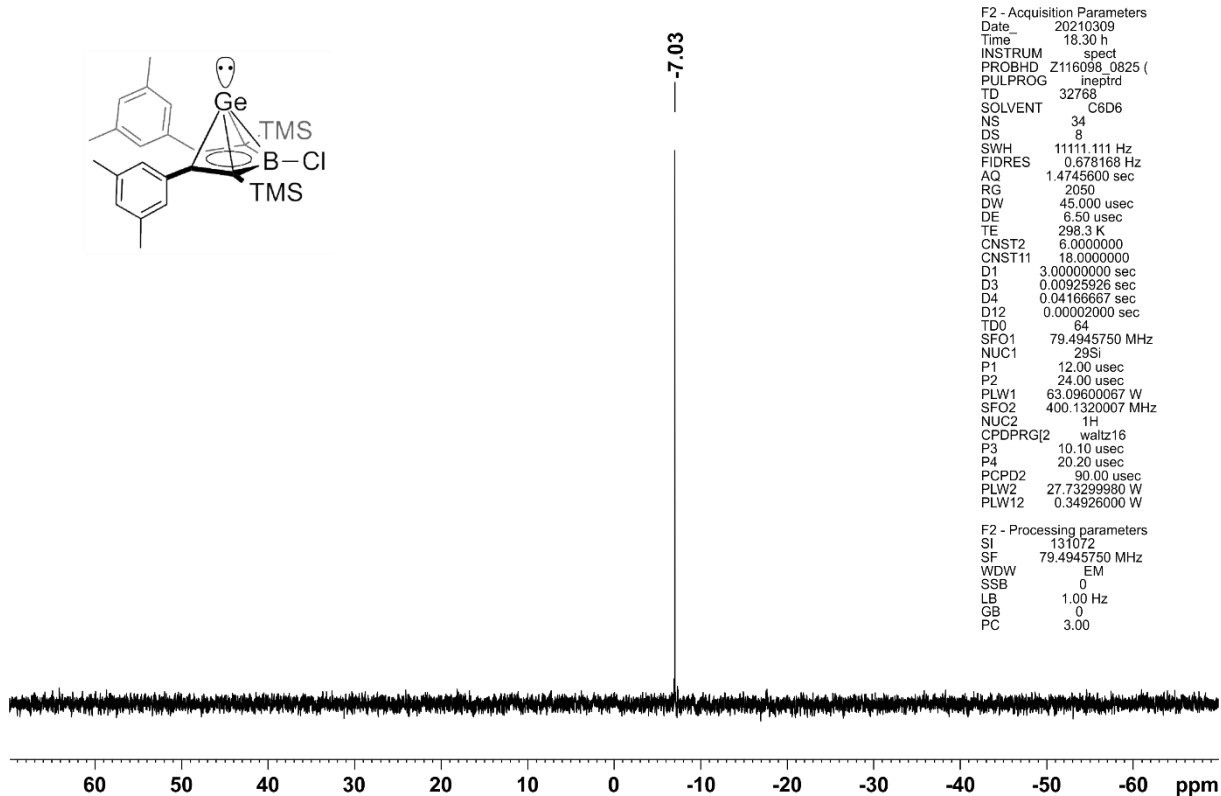

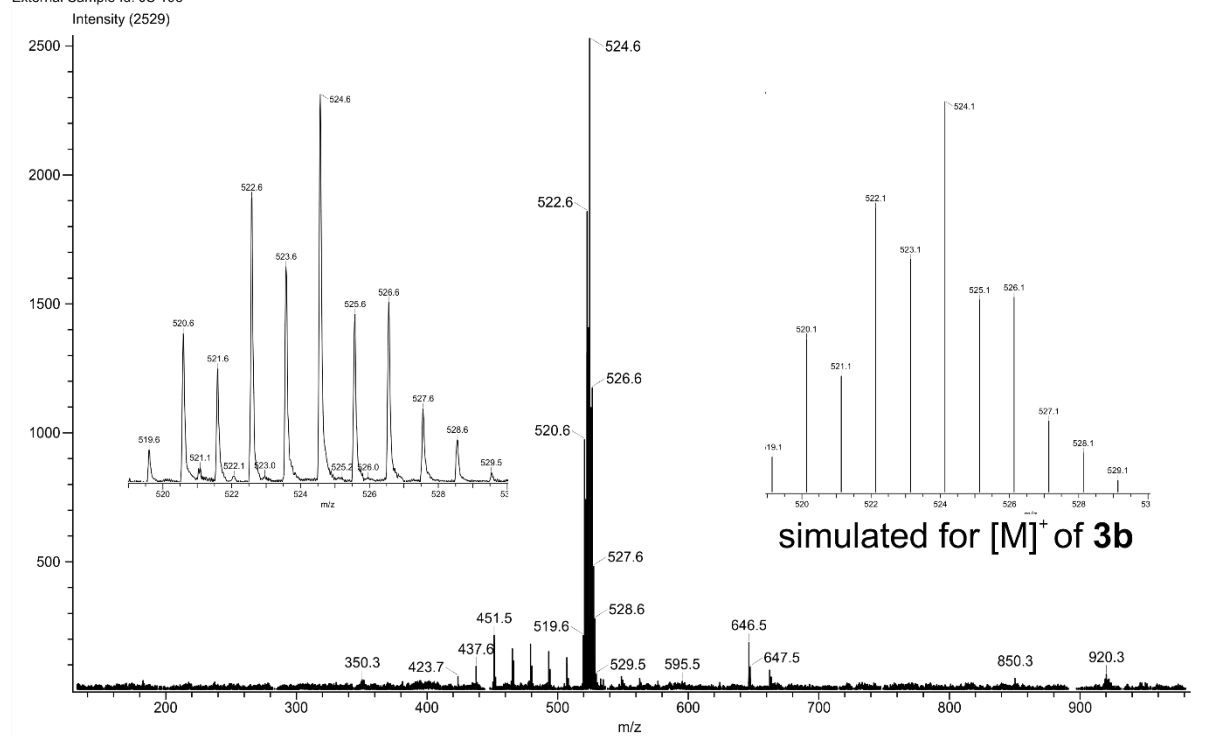

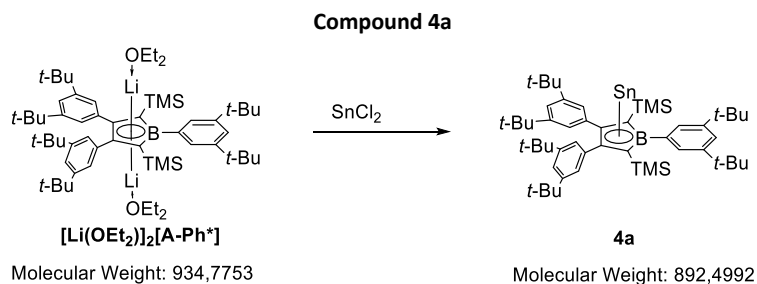

In a glovebox, compound  $[\text{Li}(\text{OEt}_2)_2[\text{A-Ph}^*]]$  (47.3 mg, 0.051 mmol, 1 eq) was dissolved in dry and degassed diethyl ether (1.5 mL). The pale yellow solution was added to a suspension of  $\text{SnCl}_2$  (9.6 mg, 0.051 mmol, 1 eq) in dry and degassed diethyl ether (0.5 mL). After completed addition a colourless precipitate had formed and a yellow solution was obtained. The reaction was stirred for 45 min at ambient temperature. Subsequently the reaction mixture was filtered through a syringe equipped with a thin plug of glass fiber (Whatman GF/B) and the solvent of the yellow filtrate was removed under reduced pressure. The obtained yellow solid was dissolved in dry and degassed hexane (0.2 mL) and this solution was stored openly in a glovebox. After most of the solvent evaporated, crystals of compound **4a** started to form. The mother liquor was carefully decanted off with a syringe and the crystals were washed with a small amount of cold hexane ( $-40^\circ\text{C}$ , few drops). The isolated crystals were dried under reduced pressure to yield compound **4a** (24.3 mg, 0.027 mmol, 54 %) as a yellow powder.

#### Analytical Data for Compound 4a

##### NMR:

$^1\text{H}$  (500.25 MHz, 298 K,  $\text{C}_6\text{D}_6$ ,  $\text{CD}_5\text{H}$  at 7.15 ppm): 7.70 (d,  $^4J_{\text{HH}} = 1.9$  Hz, 2H, *o*- $H_{\text{Ar}1}$ ), 7.50 (t,  $^4J_{\text{HH}} = 1.9$  Hz, 1H, *p*- $H_{\text{Ar}1}$ ), 7.24 (t,  $^4J_{\text{HH}} = 1.8$  Hz, 2H, *p*- $H_{\text{Ar}3,4}$ ), 7.16 (br d, 4H, *o*- $H_{\text{Ar}3,4}$ ), 1.48 (s, 18H,  $\text{Ar}_1\text{-C}(\text{Me})_3$ ), 1.20 (s, 36H,  $\text{Ar}_{3,4}\text{-C}(\text{Me})_3$ ), 0.04 (s, 18H,  $\text{Si}(\text{Me})_3$ ).

$^{13}\text{C}\{^1\text{H}\}$  (100.65 MHz, 298 K,  $\text{C}_6\text{D}_6$ , solvent signal at 128.0 ppm): 149.9 (*m*- $\text{C}_{\text{Ar}3,4}$ ), 148.6 (*m*- $\text{C}_{\text{Ar}1}$ ), 145.7 (borole- $\text{C}_{3,4}$ ), 143.1 (*ipso*- $\text{C}_{\text{Ar}1}$ ), 137.2 (*ipso*- $\text{C}_{\text{Ar}3,4}$ ), 130.5 (*o*- $\text{C}_{\text{Ar}1}$ ), ca. 128.0 (*o*- $\text{C}_{\text{Ar}3,4}$ , completely overlapped by the solvent signal, assigned via HSQC), 120.4 (*p*- $\text{C}_{\text{Ar}3,4}$ ), 119.3 (*p*- $\text{C}_{\text{Ar}1}$ ), 114.3 (borole- $\text{C}_{2,5}$ ), 34.9 ( $\text{Ar}_1\text{-C}(\text{CH}_3)_3$ ), 34.7 ( $\text{Ar}_{3,4}\text{-C}(\text{CH}_3)_3$ ), 31.9 ( $\text{Ar}_1\text{-C}(\text{CH}_3)_3$ ), 31.6 ( $\text{Ar}_{3,4}\text{-C}(\text{CH}_3)_3$ ), 3.1 ( $\text{Si}(\text{CH}_3)_3$ ).

$^{11}\text{B}$  (160.50 MHz, 298 K,  $\text{C}_6\text{D}_6$ ): 32.2.

$^{29}\text{Si}$ -INEPT (99.38 MHz, 298 K,  $\text{C}_6\text{D}_6$ ): -8.5.

$^{119}\text{Sn}\{^1\text{H}\}$  (186.19 MHz, 298 K,  $\text{C}_6\text{D}_6$ ): -1896.94 ( $^{10}\text{B}$  isotopologue), -1897.19 ( $^{11}\text{B}$  isotopologue).

**Elemental Analysis:**  $\text{C}_{60}\text{H}_{101}\text{BLi}_2\text{O}_2\text{Si}_2$  calcd C 77.05, H 10.88; observed C 76.70, H 11.06.

**LIFDI-MS:** calcd exact mass: 892.5 m/z; observed m/z: 892.3  $[\text{M}]^+$ .

#### Crystal structure of Compound 4a

**4a** crystallised from pentane solutions through concentration by evaporation at ambient temperature. For further details on the diffraction measurement and refinement please see the respective section and the respective CIF-file.



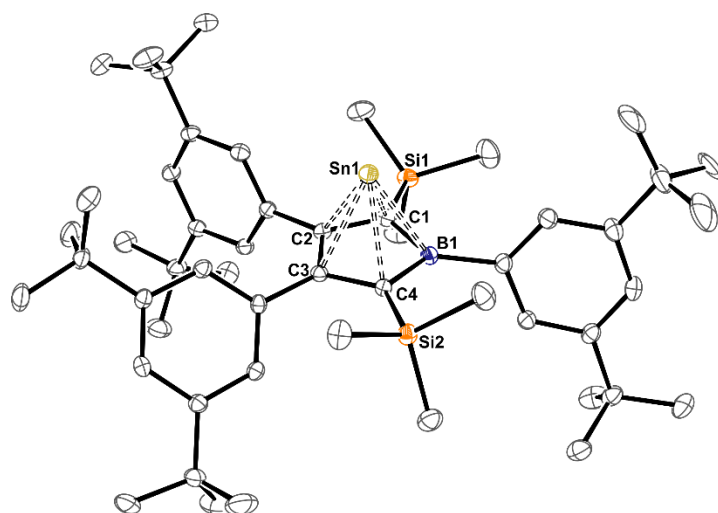

**ORTEP** plot of the molecular structure of **4a**. Atomic displacement parameters are drawn at 50% probability level. Hydrogen atoms, disordered *t*Bu-groups and a second molecule in the asymmetric unit have been omitted for the sake of clarity. Selected bond length: B1–C1 1.555(2), C1–C2 1.459(2), C2–C3 1.437(2), C3–C4 1.459(2), C4–B1 1.561(2), B1–Sn1 2.462(2), C1–Sn1 2.398(2), C2–Sn1 2.386(2), C3–Sn1 2.422(2), C4–Sn1 2.392(2).

### Spectra Plots for Compound 4a

<sup>1</sup>H-NMR-spectrum of **4a** in C<sub>6</sub>D<sub>6</sub>  
# referenced to C<sub>6</sub>D<sub>5</sub>H at 7.15 ppm

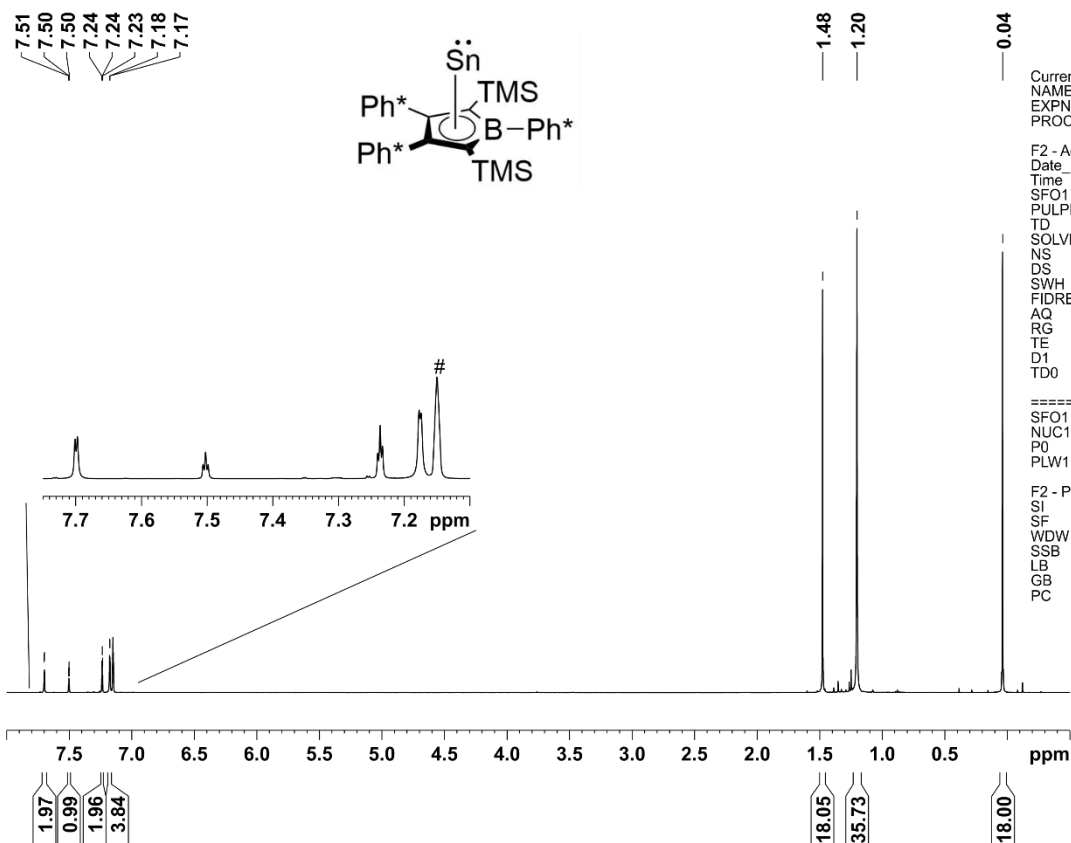

Current Data Parameters  
 NAME TH392.A  
 EXPNO 1  
 PROCNO 1

F2 - Acquisition Parameters  
 Date\_ 20200602  
 Time 9.42  
 SFO1 500.2530015 MHz  
 PULPROG zg0  
 TD 131072  
 SOLVENT C6D6  
 NS 16  
 DS 0  
 SWH 13020.833 Hz  
 FIDRES 0.099341 Hz  
 AQ 5.0331650 sec  
 RG 46.46  
 TE 298.0 K  
 D1 0.10000000 sec  
 TD0 1

===== CHANNEL f1 =====  
 SFO1 500.2530015 MHz  
 NUC1 1H  
 P0 2.00 usec  
 PLW1 14.00000000 W

F2 - Processing parameters  
 SI 262144  
 SF 500.2499959 MHz  
 WDW EM  
 SSB 0  
 LB 0.10 Hz  
 GB 0  
 PC 2.00

<sup>13</sup>C{<sup>1</sup>H}-NMR-spectrum of **4a** in C<sub>6</sub>D<sub>6</sub>  
# referenced to C<sub>6</sub>D<sub>6</sub> at 128.0 ppm

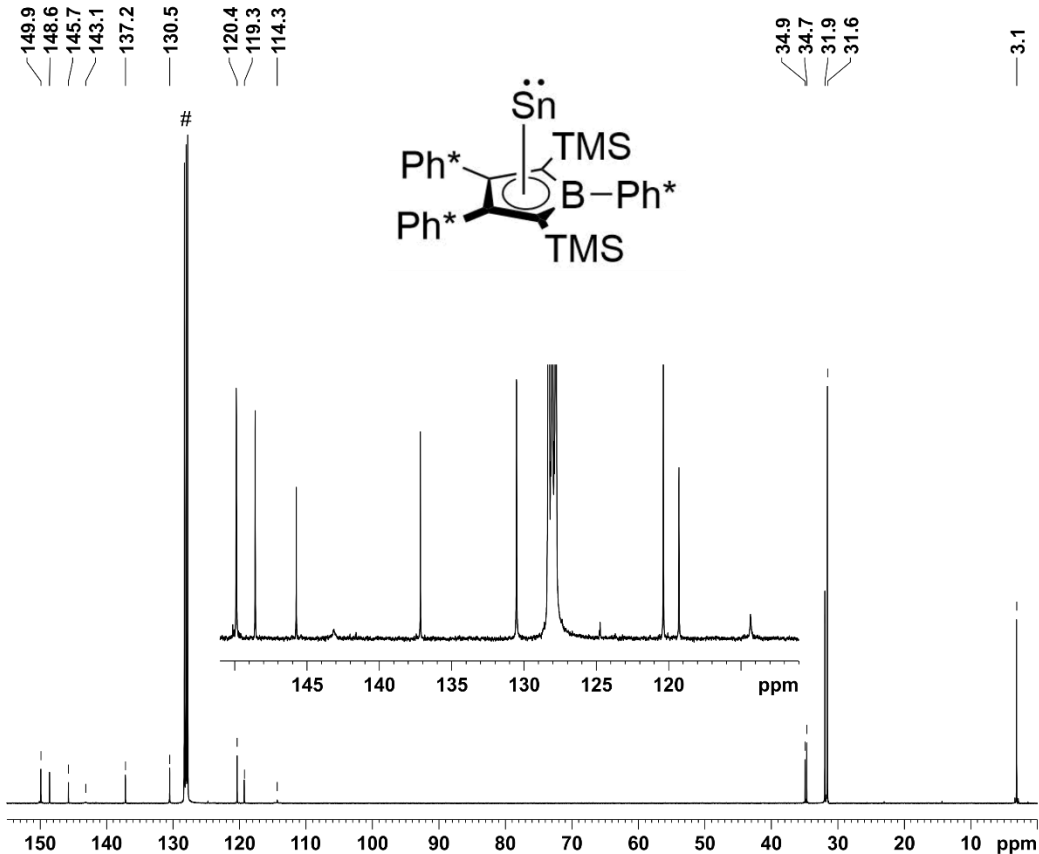

Current Data Parameters  
 NAME 402er-TH392.A  
 EXPNO 2  
 PROCNO 1

F2 - Acquisition Parameters  
 Date\_ 20200528  
 Time 0 h  
 INSTRUM Avance Neo 400 (av402)  
 PROBHD Z167430\_0002 ( )  
 PULPROG zgpg30  
 TD 49152  
 SOLVENT C6D6  
 NS 2048  
 DS 4  
 SWH 23809.523 Hz  
 FIDRES 0.968812 Hz  
 AQ 1.0321920 sec  
 RG 5.20833  
 DW 21.000 usec  
 DE 18.00 usec  
 TE 298.2 K  
 D1 0.50000000 sec  
 D11 0.03000000 sec  
 TD0 1  
 SFO1 100.6540137 MHz  
 NUC1 13C  
 P0 3.33 usec  
 P1 10.00 usec  
 PLW1 45.09799957 W  
 SFO2 400.2520012 MHz  
 NUC2 1H  
 CPDPRG2 waltz65  
 PCPD2 80.00 usec  
 PLW2 0.20988999 W  
 PLW12 0.20984000 W  
 PLW13 0.10517000 W

F2 - Processing parameters  
 SI 65536  
 SF 100.6429078 MHz  
 WDW EM  
 SSB 0  
 LB 1.00 Hz  
 GB 0  
 PC 1.40

<sup>11</sup>B-NMR spectrum (background suppressed) of **4a** in C<sub>6</sub>D<sub>6</sub>

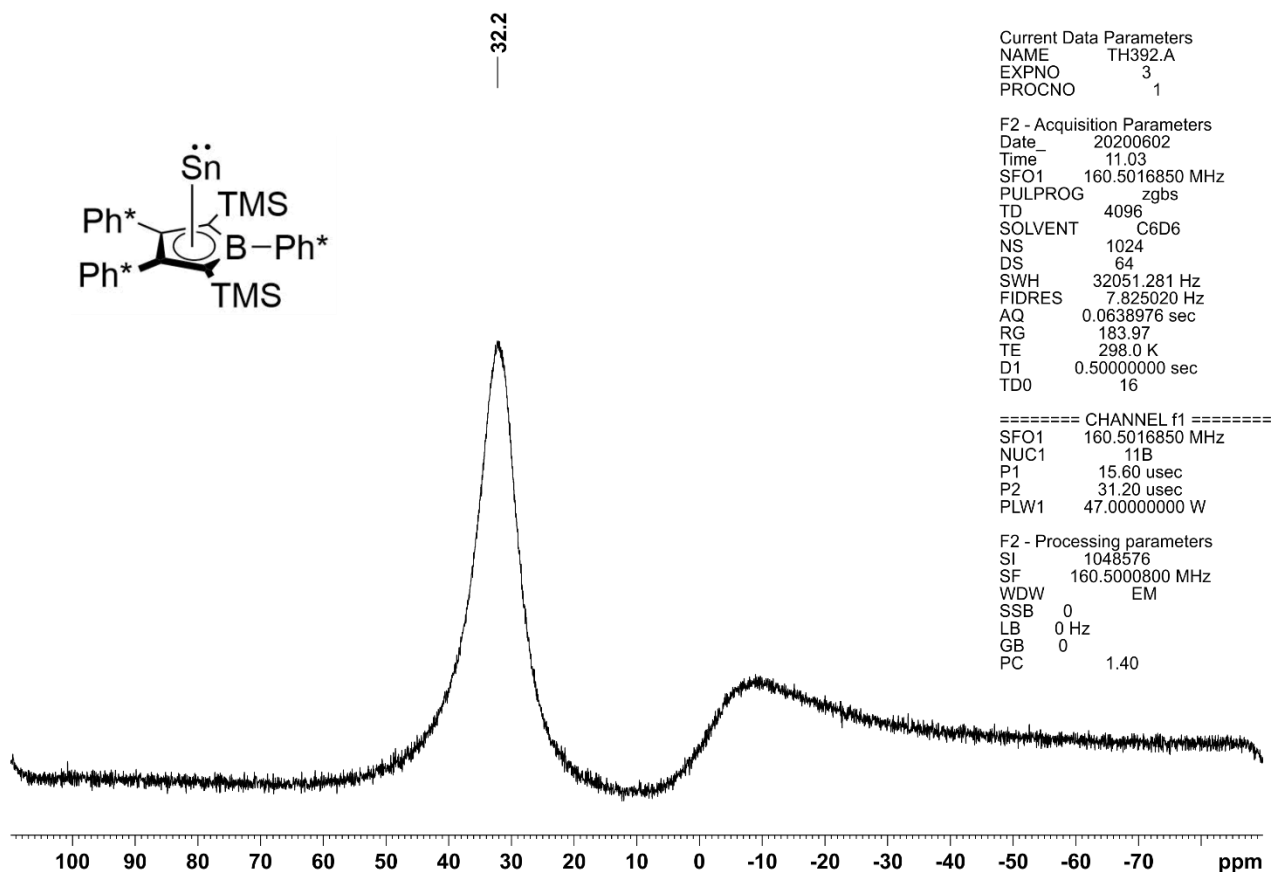

<sup>29</sup>Si-INEPT-NMR spectrum of **4a** in C<sub>6</sub>D<sub>6</sub>

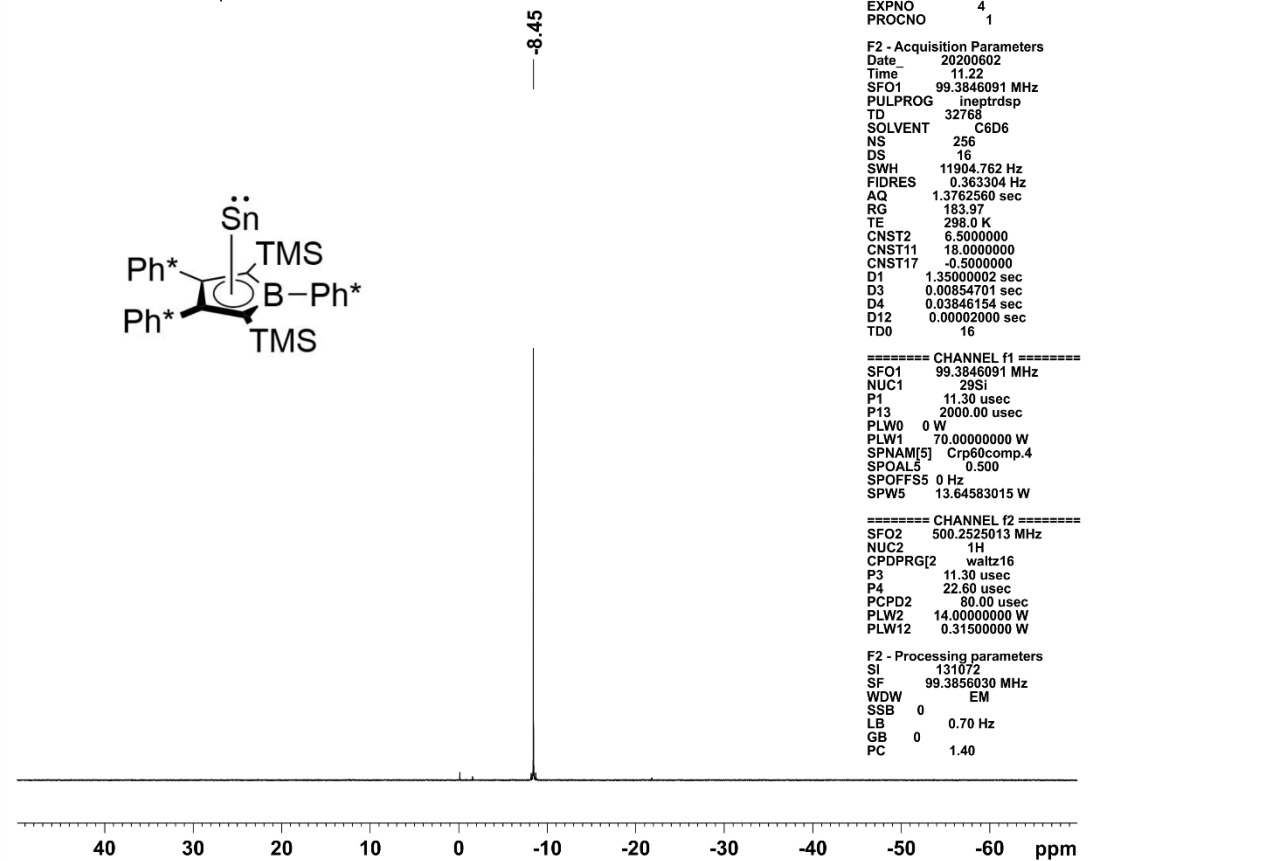

119Sn{1H}-NMR-spectrum of **4a** in C6D6

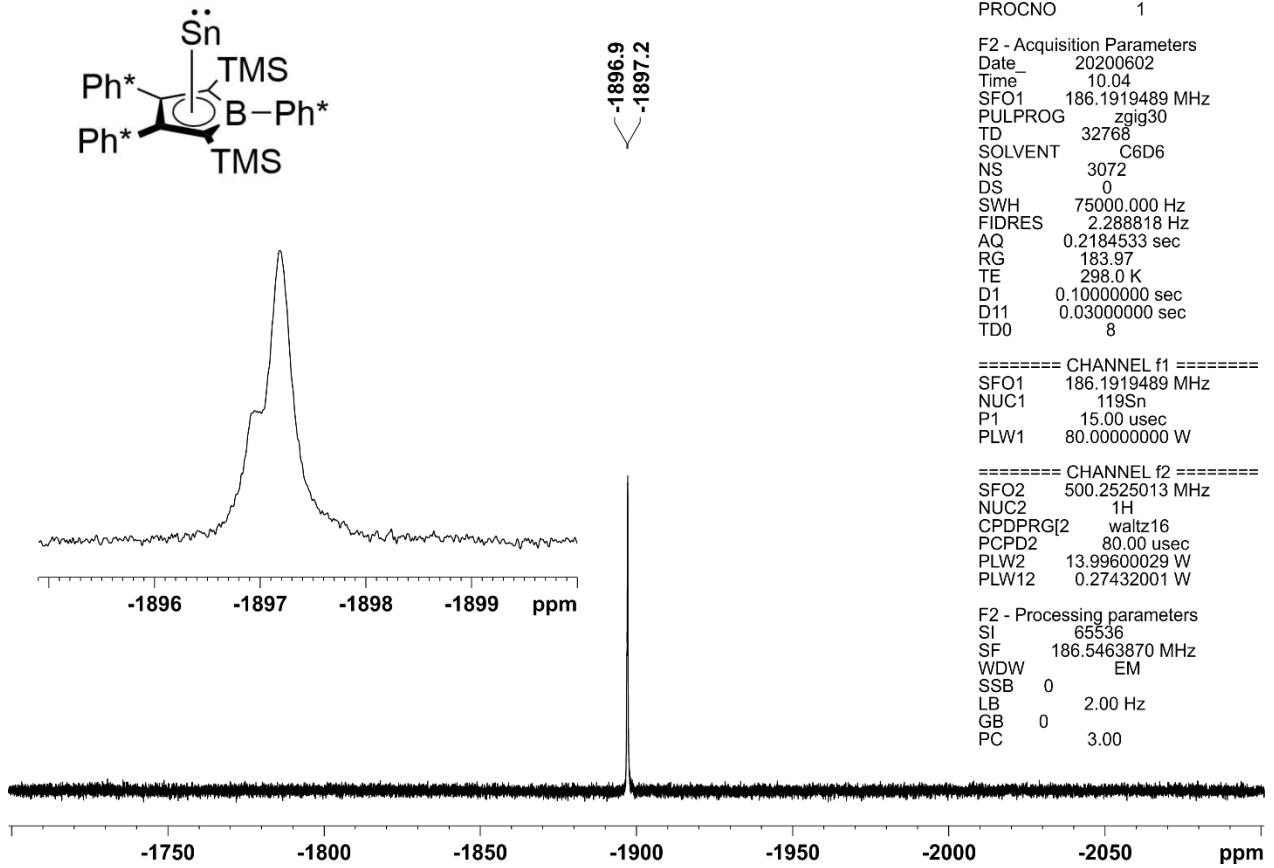

LIFDI-MS of compound **4a**

Experiment Date/Time: 7/1/2020 9:57:10 AM  
Ionization Mode: FD+

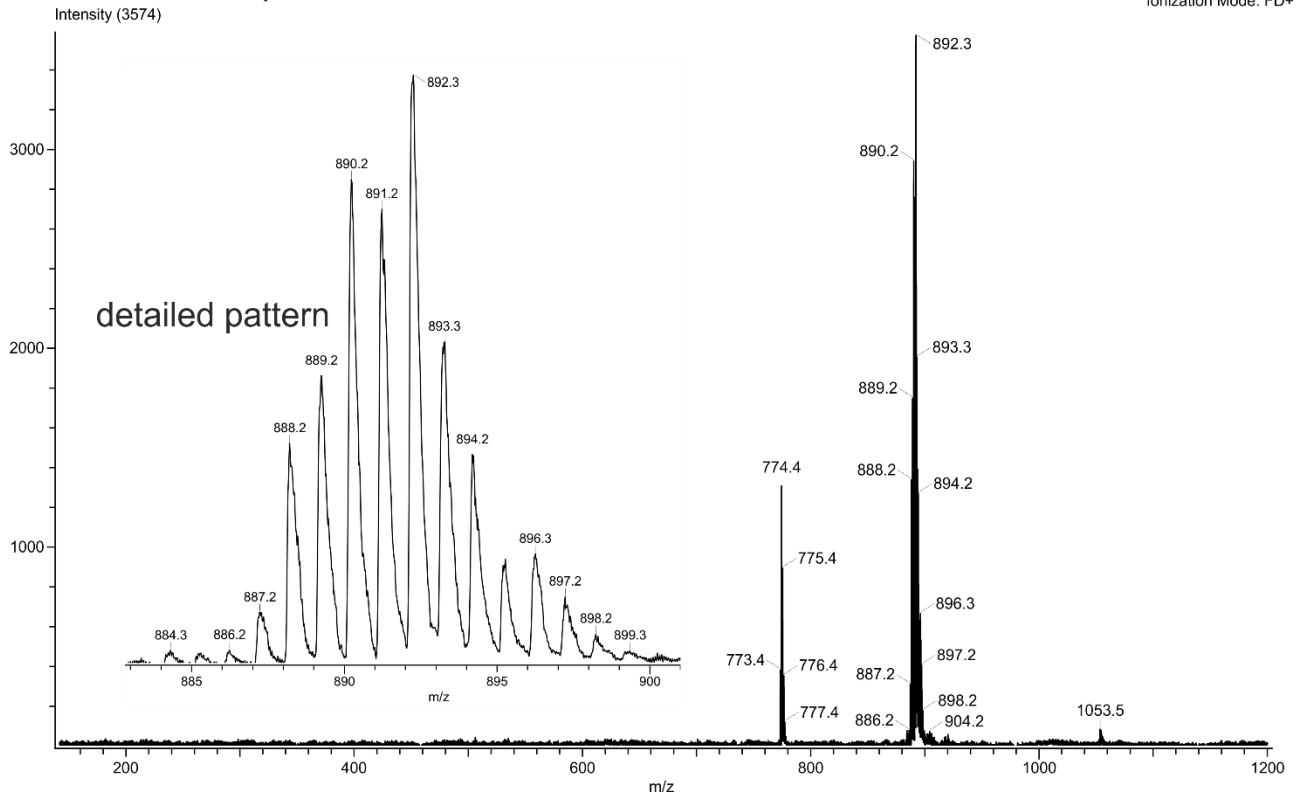

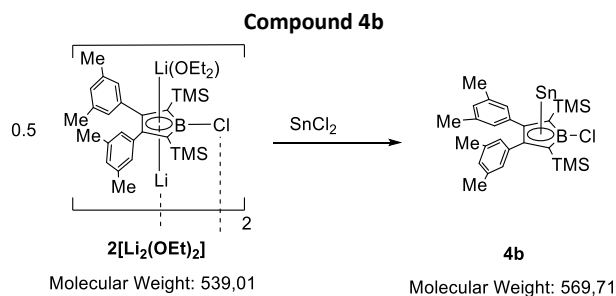

In a glovebox, a mixture of tin(II)chloride (63.9 mg, 0.338 mmol, 1 eq.) and boroleidiide **2** (206.7 mg, 0.3835 mmol, 1.1 eq.) was suspended in diethyl ether (7 mL, distilled). The pale-yellow suspension was stirred for 3 h at room temperature. The ether was removed in vacuo, giving a pale-yellow powder which was then suspended in toluene (2 mL, distilled). The suspension was filtered through a syringe filter equipped with a thin plug of glass fiber (Whatman GF/B), and the filter cake was washed with toluene (2 mL). The pale-orange filtrate was concentrated to dryness to give an orange, crystalline solid. The solid was then washed with pentane (4 × 1 mL) to give the product **4b** in form of a pale orange solid (132.6 mg, 0.2335 mmol, 69 %).

**Note:** Crystals of **4b** are pale yellow/colourless. In an attempt to remove the colored impurity from the initial crop, the product was recrystallized from toluene (1 mL,  $-35^\circ\text{C}$ ). This removed the orange contamination to give a yellow solid but reduced the overall yield to 37 %. The NMR-spectra did not change.

#### Analytical Data for Compound 3b

**NMR:**

$^1\text{H}$  (500.25 MHz, 298 K,  $\text{C}_6\text{D}_6$ ,  $\text{C}_6\text{D}_5\text{H}$  at 7.15 ppm): 6.82 (m, 4H, *o-H*), 6.47 (s, 2H, *p-H*) 1.95 (s, 12H, *m-CH*<sub>3</sub>), 0.21 (s, 18H, TMS).

$^{13}\text{C}\{^1\text{H}\}$  (100.64 MHz, 298 K,  $\text{C}_6\text{D}_6$  solvent signal at 128.0 ppm): 142.4 (*C*<sub>β</sub>), 136.7 (*m-C*<sub>ar</sub> and *ipso-C*<sub>ar</sub>), 131.2 (*o-C*<sub>ar</sub>), 129.1 (*p-C*<sub>ar</sub>), 106.8 (*C*<sub>α</sub>), 21.0 (*m-CH*<sub>3</sub>), 2.5 (TMS).

$^{11}\text{B}$  (160.50 MHz, 298 K,  $\text{C}_6\text{D}_6$ ): 30.3 ( $\omega_{1/2} = 431$  Hz).

$^{29}\text{Si-INEPT}$  (99.39 MHz, 298 K,  $\text{C}_6\text{D}_6$ ): -8.1.

$^{119}\text{Sn}$  (186.19 MHz, 298 K,  $\text{C}_6\text{D}_6$ ): -1952.4 ( $^{119}\text{Sn-}^{10}\text{B}$  isotopolog), -1952.6 ( $^{119}\text{Sn-}^{11}\text{B}$  isotopolog).

**Elemental Analysis:** ( $\text{C}_{26}\text{H}_{36}\text{BClSi}_2\text{Sn}$ ) calcd C 54.81, H 6.37, B 1.90, Cl 6.22, Si 9.86, Sn 20.84, observed C 54.78, H 6.16.

**LIFDI-MS:** calcd exact mass: 570.1 m/z, observed m/z: 570.3.

### Crystal structure of Compound 4b

**4b** crystallised from hexane or toluene solutions in a freezer (−35°C). For further details on the diffraction measurement and refinement please see the respective section and the respective CIF-file.

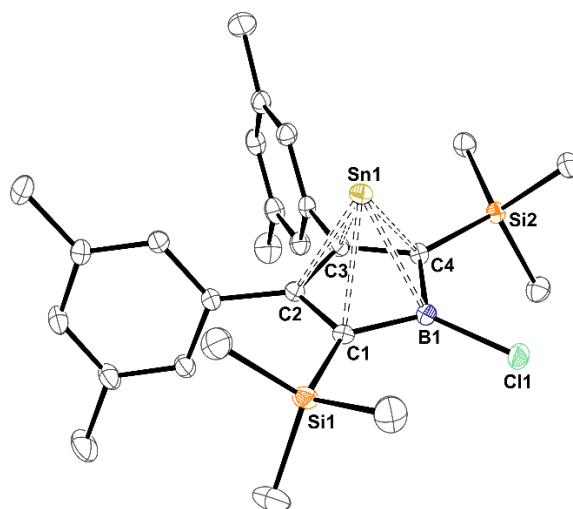

**ORTEP** plot of the molecular structure of **4b**. Atomic displacement parameters are drawn at 50% probability level. Hydrogen atoms have been omitted for the sake of clarity. Selected bond length: B1–Cl1 1.809(1), B1–C1 1.538(2), C1–C2 1.461(1), C2–C3 1.438(2), C3–C4 1.457(1), C4–B1 1.541(2), B1–Sn1 2.487(1), C1–Sn1 2.426(1), C2–Sn1 2.407(1), C3–Sn1 2.404(1), C4–Sn1 2.418(1).

Spectra Plots for Compound 4b

<sup>1</sup>H-NMR-spectrum of compound 4b in C6D6

# referenced to C6D5H at 7.15 ppm

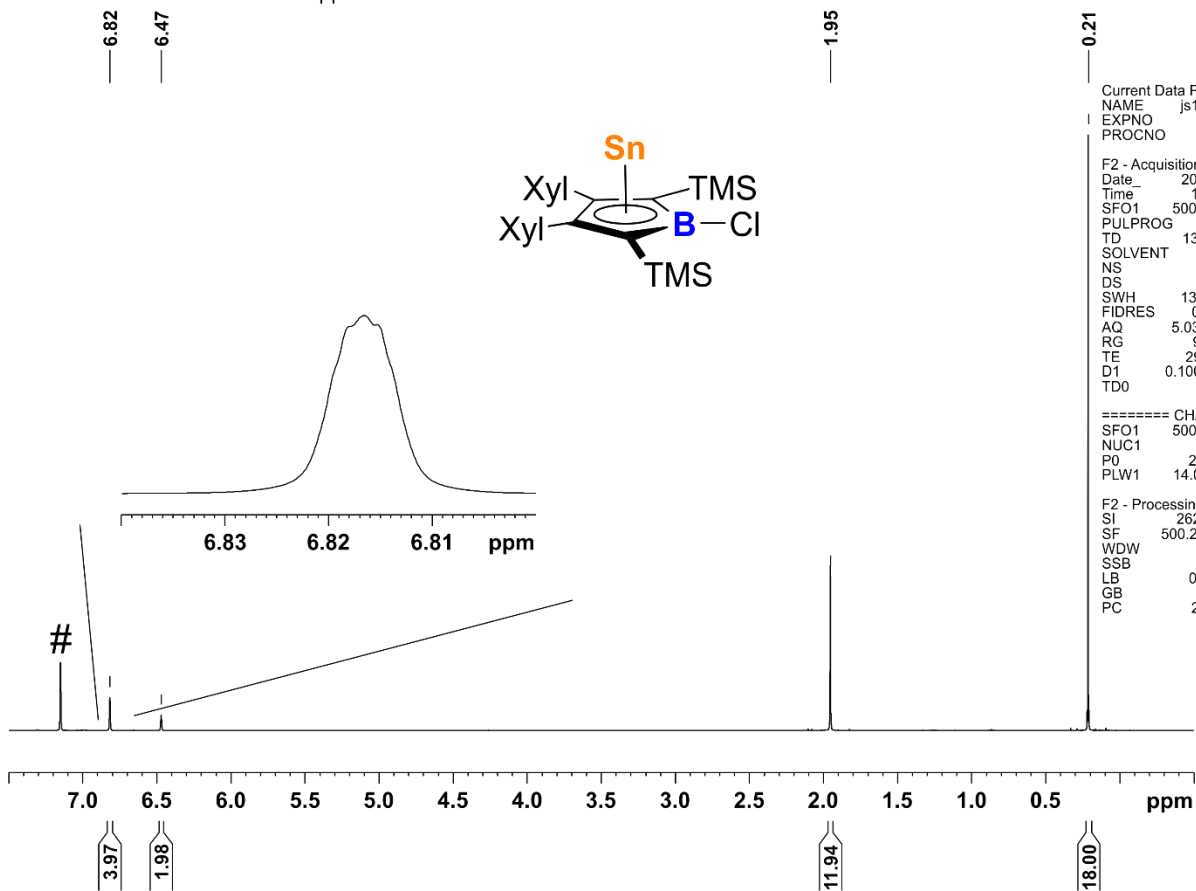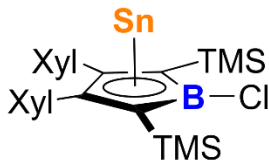

<sup>13</sup>C{<sup>1</sup>H}-NMR-spectrum of compound 4b in C6D6

# referenced to C6D6 at 128.0 ppm

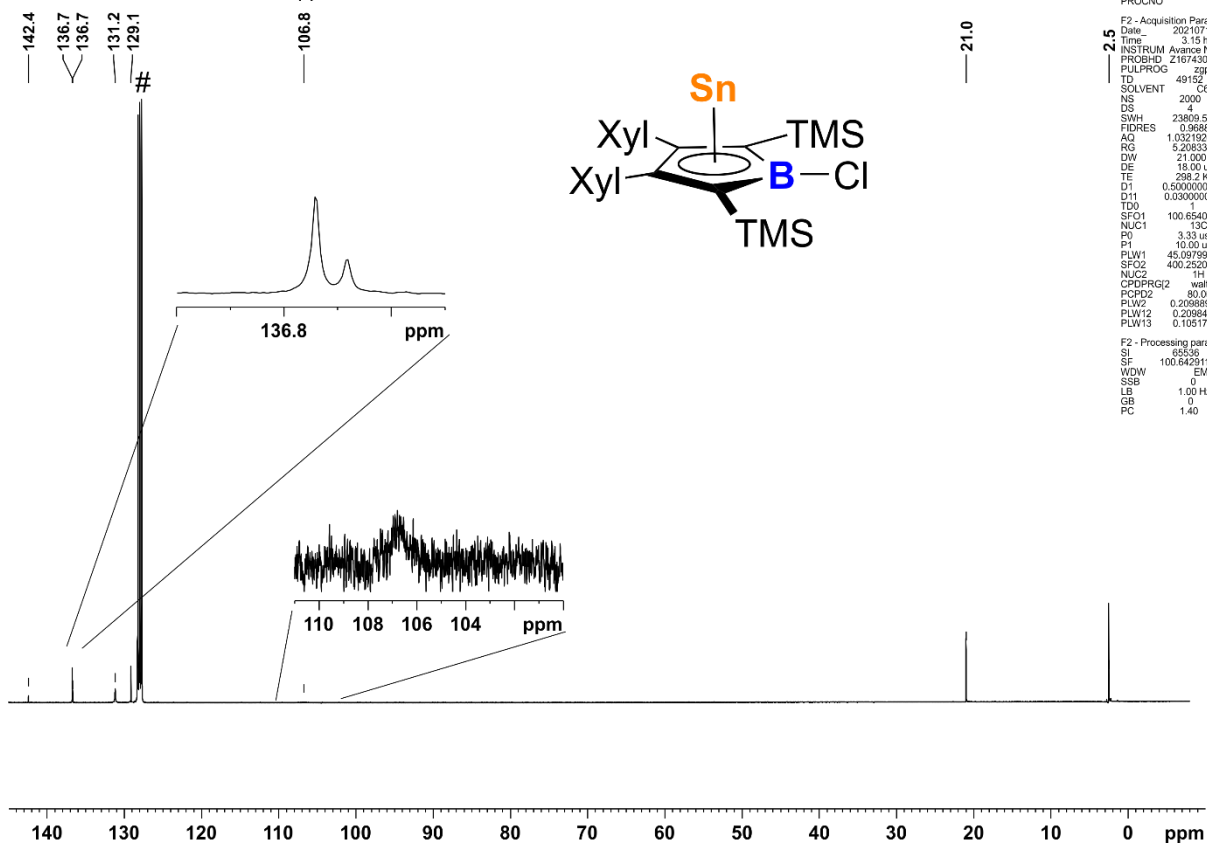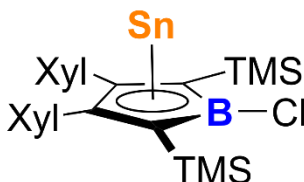

11B-NMR spectrum (background suppressed) of compound **4b** in C6D6

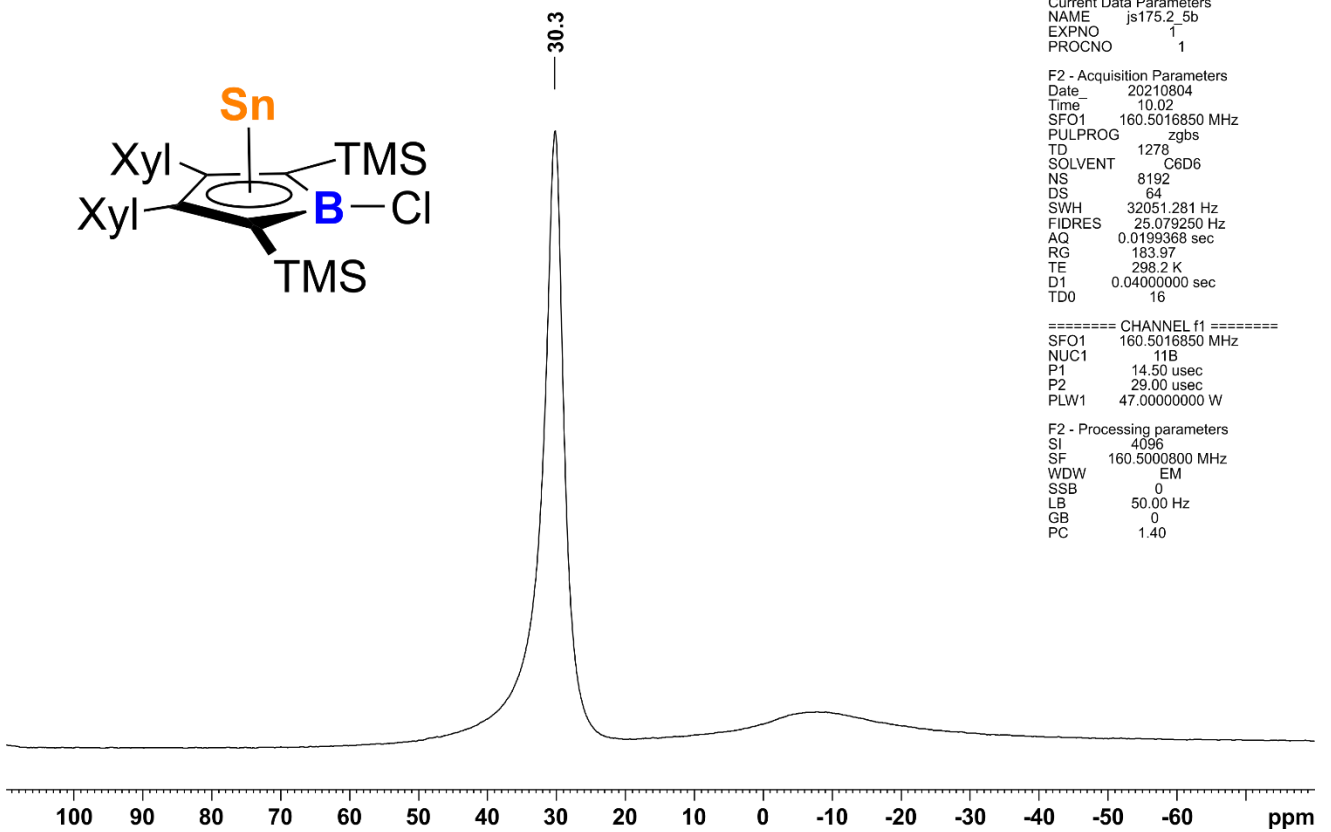

29Si-INEPT-NMR spectrum of compound X in C6D6

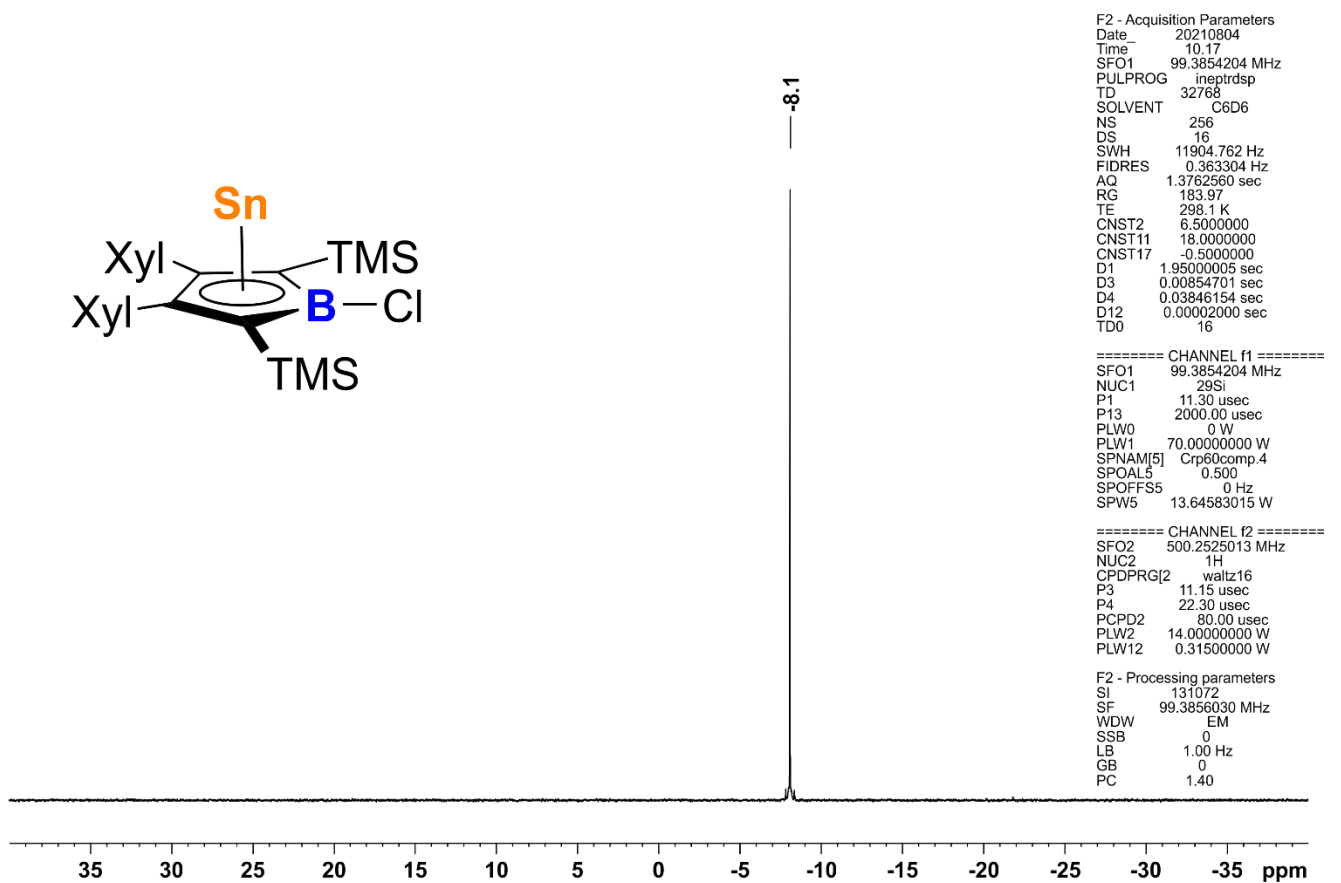



119Sn-NMR-spectrum of compound **4b** in C6D6

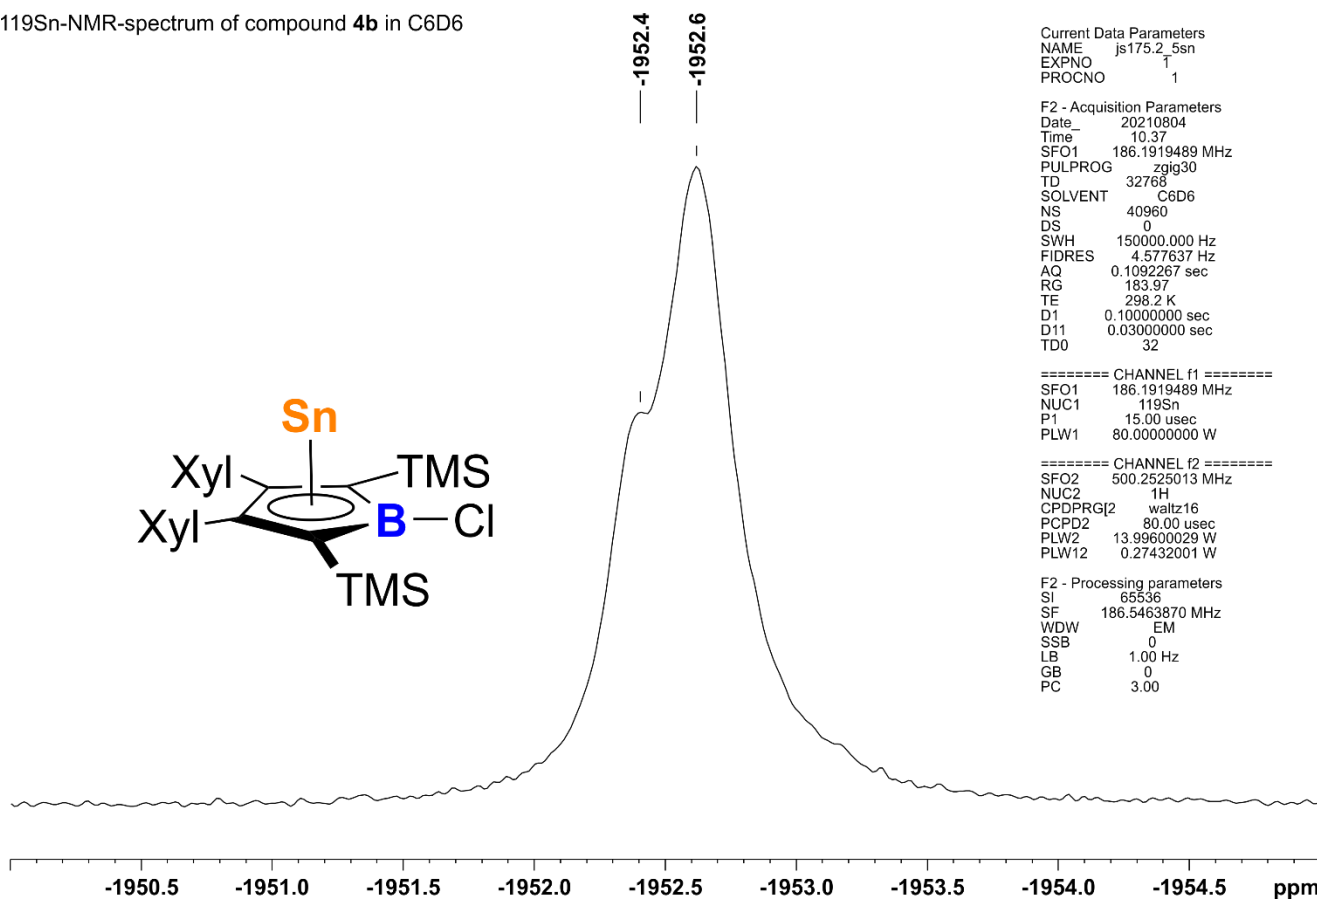

Acq. Data Name: jsarcev00015-1  
 Creation Parameters: Average(MS[1] Time:0.46..0.47)  
 External Sample Id: JS 175

Experiment Date/Time: 8/11/2021 10:42:40 AM  
 Ionization Mode: FD+

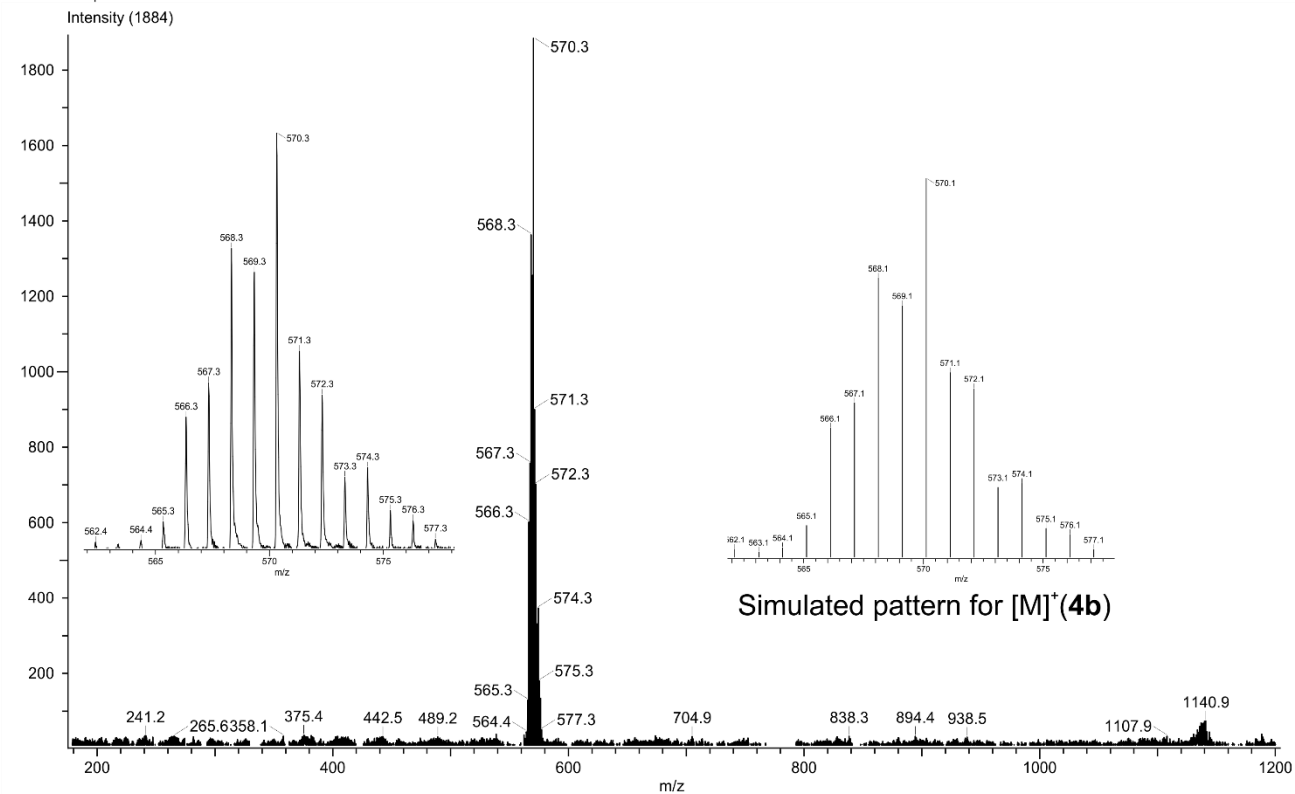

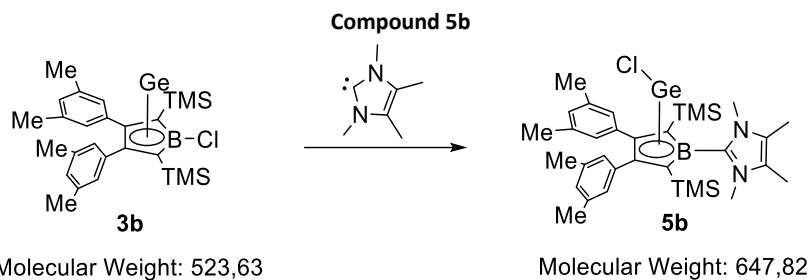

In a glovebox, a solution of 1,3,4,5-tetramethylimidazol-2-ylidene (10.8 mg, 0.0877 mmol, 1 eq.) in toluene (1 mL, distilled) was added dropwise via syringe to a stirred solution of germanium compound **3b** (46.1 mg, 0.0885 mmol, 1 eq.) in toluene (2 mL, distilled). The resulting suspension was stirred at room temperature over night. Toluene (2 mL) was added to the yellow suspension, which was subsequently filtered through a syringe filter equipped with a thin plug of glass fiber (Whatman GF/B). The filter was then washed with toluene (1 mL) and the combined filtrate was concentrated to a volume of about 2 mL and stored at  $-35^{\circ}\text{C}$  for crystallization for several days. The colorless to slightly yellowish crystals were then washed with cold ( $-35^{\circ}\text{C}$ ) toluene (0.5 mL) to obtain the product **5b** (41.2 mg, 0.0636 mmol, 72 %) after drying in vacuo as colorless crystalline material which contained ca. 0.5 equiv. of lattice toluene.

#### Analytical Data for Compound 5b

##### NMR:

$^1\text{H}$  (400.13 MHz, 298 K,  $\text{C}_6\text{D}_6$ ,  $\text{C}_6\text{D}_5\text{H}$  at 7.15 ppm): 7.34 (s, 4H, *o-H*), 6.60 (m, 2H, *p-H*), 3.84 (s, 3H, N- $\text{CH}_3$ ), 3.16 (s, 3H, N- $\text{CH}_3$ ), 2.10 (s, 12H, *m-CH}\_3*), 1.27 (s, 3H,  $\text{C}_{\text{NHC}}-\text{CH}_3$ ), 1.21 (s, 3H,  $\text{C}_{\text{NHC}}-\text{CH}_3$ ), 0.00 (s, 18H, TMS).

$^{13}\text{C}\{^1\text{H}\}$  (100.64 MHz, 298 K,  $\text{C}_6\text{D}_6$  solvent signal at 128.0 ppm): 158.9 (N-C-N, only via HMBC), 146.6 ( $\text{C}_\beta$ ), 140.2 (*ipso-C}\_{ar}*), 136.4 (*m-C}\_{ar}*), 130.7 (*o-C}\_{ar}*), 128.5 (*p-C}\_{ar}*), 125.6 ( $\text{C}_{\text{NHC}}=\text{C}_{\text{NHC}}$ ), 125.0 ( $\text{C}_{\text{NHC}}=\text{C}_{\text{NHC}}$ ), 123.6 ( $\text{C}_\alpha$ ), 35.9 (N- $\text{CH}_3$ ), 33.9 (N- $\text{CH}_3$ ), 21.2 (*m-CH}\_3*), 8.0 ( $\text{C}_{\text{NHC}}-\text{CH}_3$ ), 7.7 ( $\text{C}_{\text{NHC}}-\text{CH}_3$ ), 1.8 (TMS).

$^{11}\text{B}$  (128.38 MHz, 298 K,  $\text{C}_6\text{D}_6$ ): 15.7 ( $\omega_{1/2} = 340$  Hz).

$^{29}\text{Si}$ -INEPT (79.49 MHz, 298 K,  $\text{C}_6\text{D}_6$ ): -9.2.

**Elemental Analysis:**  $\text{C}_{33}\text{H}_{48}\text{BClN}_2\text{Si}_2\text{Ge}$   $\times$  0.5 (toluene) calcd C 63.18, H 7.55, N 4.04, B 1.56, Cl 5.11, Si 8.09, Ge 10.47; observed C 63.38, H 7.14, N 4.06.

**LIFDI-MS:** calcd exact mass: 648.2 m/z, observed m/z: 613.4 ( $[\text{M}-\text{Cl}]^+ \text{C}_{33}\text{H}_{48}\text{BN}_2\text{Si}_2\text{Ge}^+$ ).

### Crystal structure of Compound 5b

**4b** crystallised from toluene solutions in a freezer (−35°C). For further details on the diffraction measurement and refinement please see the respective section and the respective CIF-file.

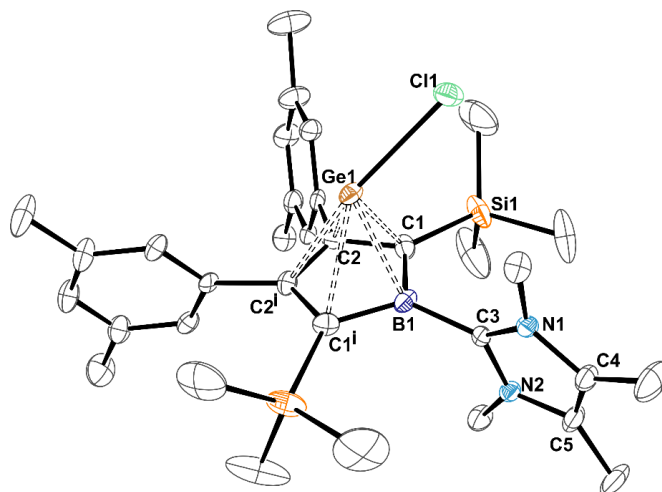

**ORTEP** plot of the molecular structure of **5b**. Atomic displacement parameters are drawn at 50% probability level. Hydrogen atoms, disorders of the Xylyl-group and a lattice toluene molecule have been omitted for the sake of clarity. Selected bond length: B1–C3 1.592(5), B1–C1 1.535(4), C1–C2 1.437(3), C2–C2' 1.428(3), B1–Ge1 2.291(3), C1–Ge1 2.266(3), C2–Ge1 2.369(2), C2'–Ge1 2.482(2), C1'–Ge1 2.465(3), Ge1–Cl1 2.543(2).

### Spectra Plots for Compound 5b

<sup>1</sup>H-NMR-spectrum of compound **5b** in C<sub>6</sub>D<sub>6</sub>  
# referenced to C<sub>6</sub>D<sub>5</sub>H at 7.15 ppm

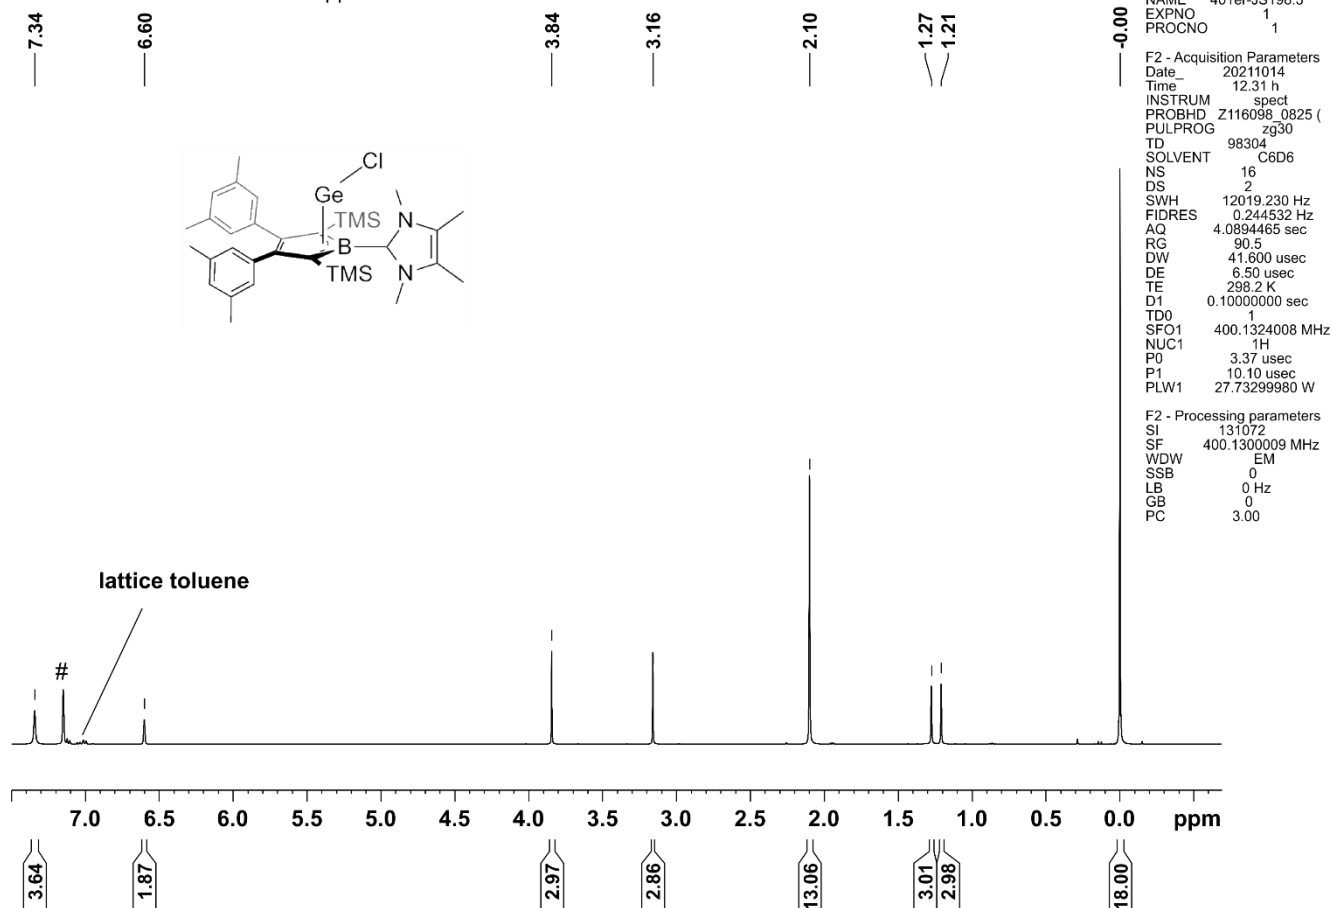

Current Data Parameters  
 NAME 401er-JS196.3  
 EXPNO 1  
 PROCNO 1  
 F2 - Acquisition Parameters  
 Date\_ 20211014  
 Time 12.31 h  
 INSTRUM spect  
 PROBHD Z116098\_0825 ( )  
 PULPROG zg30  
 TD 98304  
 SOLVENT C6D6  
 NS 16  
 DS 2  
 SWH 12019.230 Hz  
 FIDRES 0.244532 Hz  
 AQ 4.0894465 sec  
 RG 90.5  
 DW 41.600 usec  
 DE 6.50 usec  
 TE 298.2 K  
 D1 0.10000000 sec  
 TD0 1  
 SFO1 400.1324008 MHz  
 NUC1 1H  
 P0 3.37 usec  
 P1 10.10 usec  
 PLW1 27.73299980 W  
 F2 - Processing parameters  
 SI 131072  
 SF 400.130009 MHz  
 WDW EM  
 SSB 0  
 LB 0 Hz  
 GB 0  
 PC 3.00

<sup>13</sup>C{<sup>1</sup>H}-NMR-spectrum of compound **5b** in C<sub>6</sub>D<sub>6</sub>  
# referenced to C<sub>6</sub>D<sub>6</sub> at 128.0 ppm

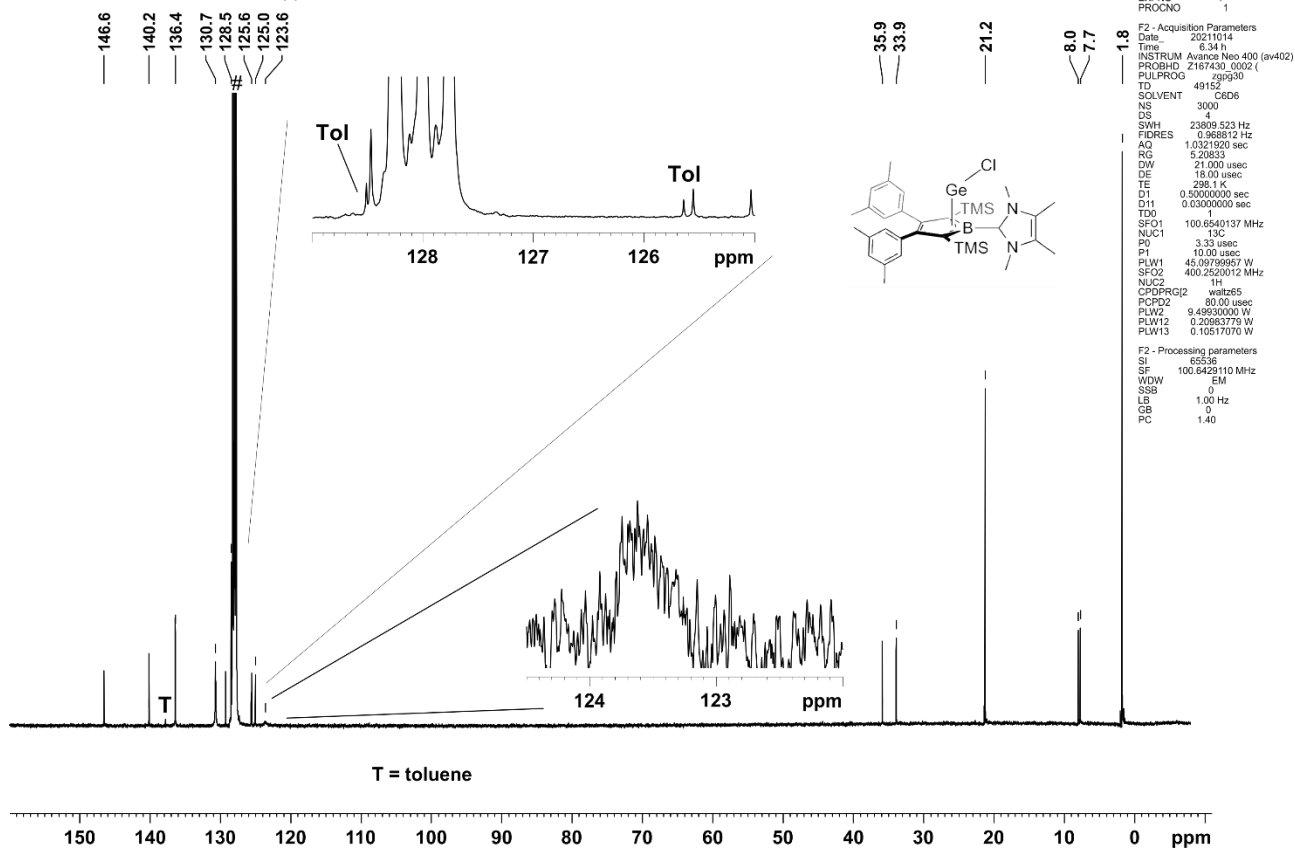

<sup>11</sup>B-NMR spectrum (background suppressed) of compound **5b** in C<sub>6</sub>D<sub>6</sub>

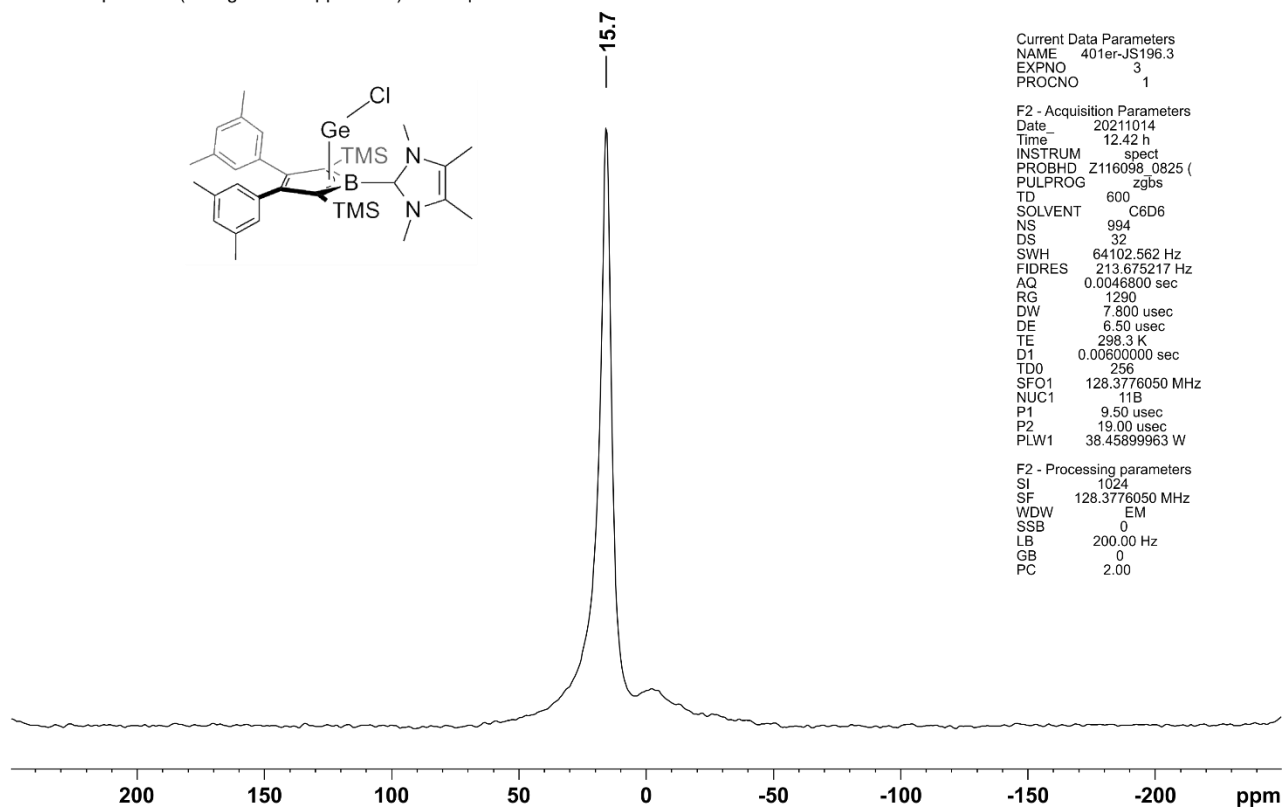



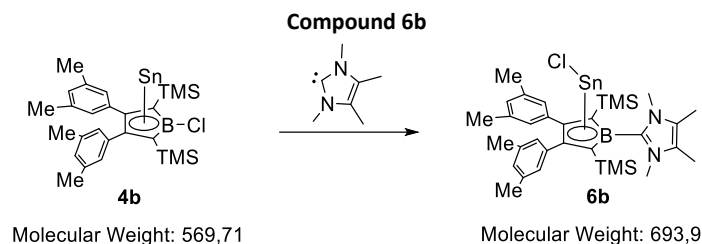

In a glovebox, a solution of 1,3,4,5-tetramethylimidazol-2-ylidene (12.6 mg, 0.101 mmol, 1 eq.) in toluene (1 mL, distilled) was added dropwise via syringe to a stirred solution of **4b** (57.2 mg, 0.100 mmol, 1 eq.) in toluene (2 mL, distilled). The resulting yellow suspension was stirred at room temperature for 1 h and the solvent was subsequently removed in vacuo. The resulting yellow solid was washed three times with 1 mL of a 1:1 pentane/toluene mixture. After drying, the solid was suspended in toluene (5 mL, 3 mL) and filtered through a syringe filter equipped with a thin plug of glass fiber (Whatman GF/B). The yellow filtrate was then stored at  $-35\text{ }^{\circ}\text{C}$  for crystallization. The resulting crystals were removed and washed with hexane to give the desired product **6b** (23.6 mg, 0.0340 mmol, 34 %). The supernatant from the crystallization was concentrated to dryness and washed with cold toluene (0.5 mL, 0.3 mL) which also led to the spectroscopically pure product **6b** (19.0 mg, 0.0274 mmol, 27 %).

**Note:** Solubility in toluene was only very limited and was greatly increased in more polar solvents.

#### Analytical Data for Compound 6b

**NMR:**

$^1\text{H}$  (500.25 MHz, 298 K,  $\text{CD}_2\text{Cl}_2$ ,  $\text{CDHCl}_2$  at 5.32 ppm): 6.88 (s, 4H, *o-H*), 6.76 (m, 2H, *p-H*), 4.15 (s, 3H, N- $\text{CH}_3$ ), 3.59 (s, 3H, N- $\text{CH}_3$ ), 2.28 (two s, partially superimposed, 6H,  $\text{C}_{\text{NHC}}\text{-CH}_3$ ) 2.20 (m, 12H, *m-CH}\_3*),  $-0.37$  (s, 18H, TMS).

$^1\text{H}$  (400.13 MHz, 298 K, toluene- $d_8$ ,  $\text{C}_6\text{D}_5\text{-CD}_2\text{H}$  at 2.11 ppm): 7.23 (s, 4H, *o-H*), 6.60 (m, 2H, *p-H*), 3.87 (s, 3H, N- $\text{CH}_3$ ), 3.19 (s, 3H, N- $\text{CH}_3$ ), 2.14 (m, 12H, *m-CH}\_3*), 1.41 (m, 3H,  $\text{C}_{\text{NHC}}\text{-CH}_3$ ), 1.33 (m, 3H,  $\text{C}_{\text{NHC}}\text{-CH}_3$ ),  $-0.04$  (s, 18H, TMS).

$^{13}\text{C}\{^1\text{H}\}$  (100.64 MHz, 298 K,  $\text{CD}_2\text{Cl}_2$  solvent signal at 54.24 ppm): ca. 159 (N-C-N, only via HMBC), 148.7 ( $\text{C}_\theta$ ), 140.5 (*ipso-C<sub>ar</sub>*), 136.9 (*m-C<sub>ar</sub>*), 131.9 (*o-C<sub>ar</sub>*), 128.3 (*p-C<sub>ar</sub>*), 126.7 ( $\text{C}_{\text{NHC}}=\text{C}_{\text{NHC}}$ ), 126.5 ( $\text{C}_{\text{NHC}}=\text{C}_{\text{NHC}}$ ), 121.3 ( $\text{C}_\alpha$ ), 36.8 (N- $\text{CH}_3$ ), 35.4 (N- $\text{CH}_3$ ), 21.7 (*m-CH}\_3*), 9.7 ( $\text{C}_{\text{NHC}}\text{-CH}_3$ ), 9.5 ( $\text{C}_{\text{NHC}}\text{-CH}_3$ ), 1.9 (TMS).

$^{13}\text{C}\{^1\text{H}\}$  (100.64 MHz, 298 K, toluene- $d_8$  solvent signal at 21.37 ppm): ca. 161 (N-C-N, only via HMBC), 149.6 ( $\text{C}_\theta$ ), 141.8 (*ipso-C<sub>ar</sub>*), 137.2 (*m-C<sub>ar</sub>*), 132.4 (*o-C<sub>ar</sub>*), ca. 129 (*p-C<sub>ar</sub>*, superimposed by solvent signal), 125.5 ( $\text{C}_{\text{NHC}}=\text{C}_{\text{NHC}}$ ), ca. 123 ( $\text{C}_\alpha$ , only via HMBC), 36.9 (N- $\text{CH}_3$ ), 35.2 (N- $\text{CH}_3$ ), 22.2 (*m-CH}\_3*), 9.0 ( $\text{C}_{\text{NHC}}\text{-CH}_3$ ), 8.7 ( $\text{C}_{\text{NHC}}\text{-CH}_3$ ), 3.1 (TMS).

$^{11}\text{B}$  (160.50 MHz, 298 K,  $\text{CD}_2\text{Cl}_2$ ): 16.6 ( $\omega_{1/2} = 180$  Hz).

$^{11}\text{B}$  (128.38 MHz, 298 K, toluene- $d_8$ ): 16.2 ( $\omega_{1/2} = 350$  Hz).

$^{29}\text{Si}$  (99.39 MHz, 298 K,  $\text{CD}_2\text{Cl}_2$ ):  $-9.8$ .

$^{29}\text{Si}$  (79.49 MHz, 298 K, toluene- $d_8$ ):  $-9.9$ .

$^{119}\text{Sn}$  (186.19 MHz, 298 K,  $\text{CD}_2\text{Cl}_2$ ):  $-1542.4$ .

$^{119}\text{Sn}$  (186.19 MHz, 298 K, toluene- $d_8$ ):  $-1333.6$

**Elemental Analysis:** (C<sub>33</sub>H<sub>48</sub>BClN<sub>2</sub>Si<sub>2</sub>Sn)×0.5(toluene) calcd C 59.25, H 7.08, N 3.79, B 1.46, Cl 4.79, Si 7.59, Sn 16.04; observed C 59.30, H 6.79, N 3.72.

**LIFDI-MS:** calcd exact mass: 694.2 m/z, observed m/z: 659.3 ([M-Cl]<sup>+</sup>, C<sub>33</sub>H<sub>48</sub>BN<sub>2</sub>Si<sub>2</sub>Sn<sup>+</sup>).

### Crystal structure of Compound 6b

**6b** crystallised from toluene solutions in a freezer (−35°C). For further details on the diffraction measurement and refinement please see the respective section and the respective CIF-file.

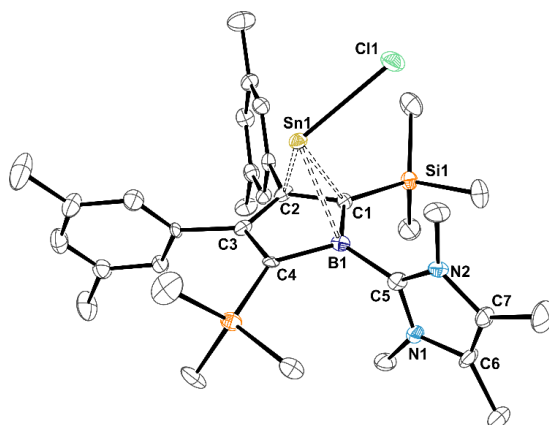

**ORTEP** plot of the molecular structure of **6b**. Atomic displacement parameters are drawn at 50% probability level. Hydrogen atoms, a lattice toluene and a second independent molecule within the asymmetric unit have been omitted for the sake of clarity. Selected bond length: B1–C5 1.59(2), B1–C1 1.56(1), C1–C2 1.47(1), C2–C3 1.41(1), C3–C4 1.44(1), C4–B1 1.58(1), B1–Sn1 2.45(1), C1–Sn1 2.407(8), C2–Sn1 2.493(8), C3–Sn1 2.684(8), C4–Sn1 2.715(8), Sn1–Cl1 2.649(1).

### Spectra Plots for Compound 6b

<sup>1</sup>H-NMR-spectrum of compound **6b** in CD<sub>2</sub>Cl<sub>2</sub>  
# referenced to CDHCl<sub>2</sub> at 5.32 ppm

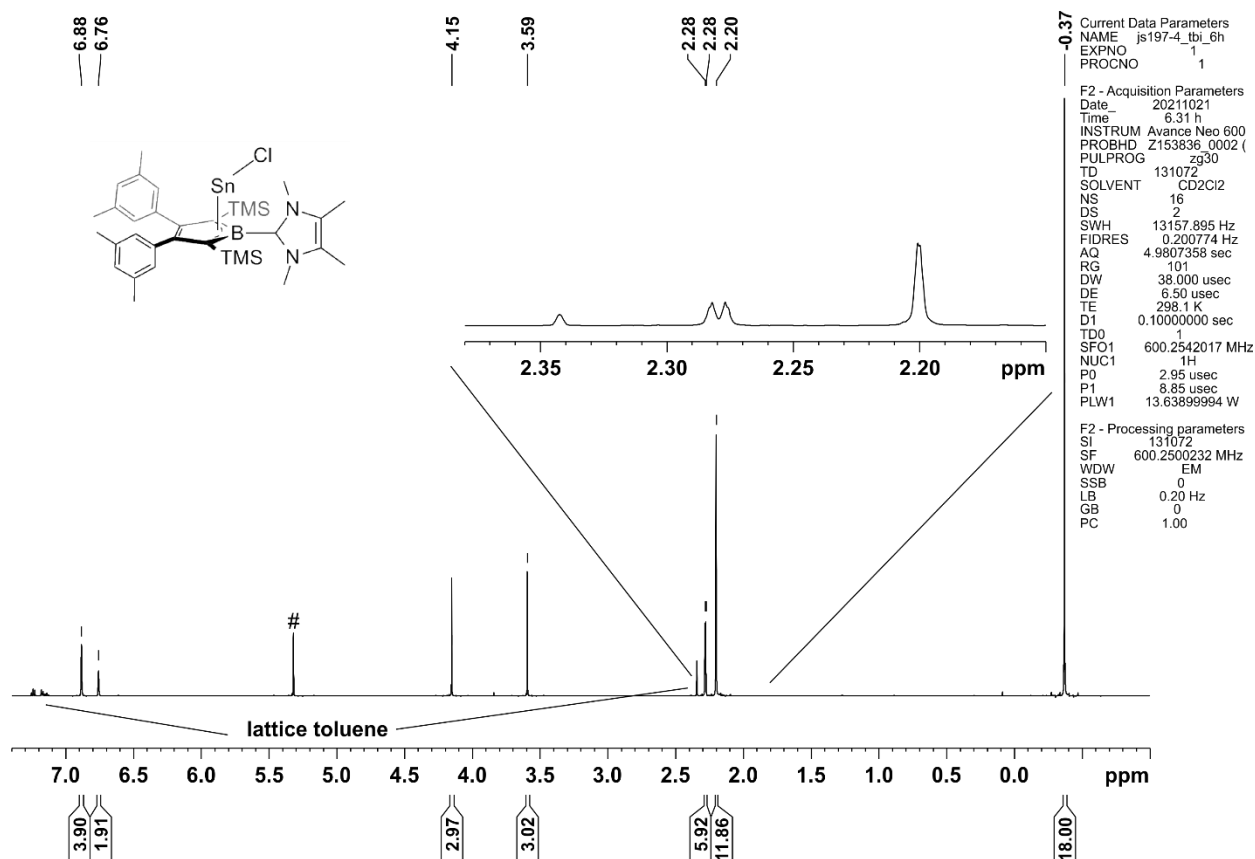

1H-NMR-spectrum of compound **6b** in toluene-d8  
# referenced to C6D5CD2H at 2.11 ppm

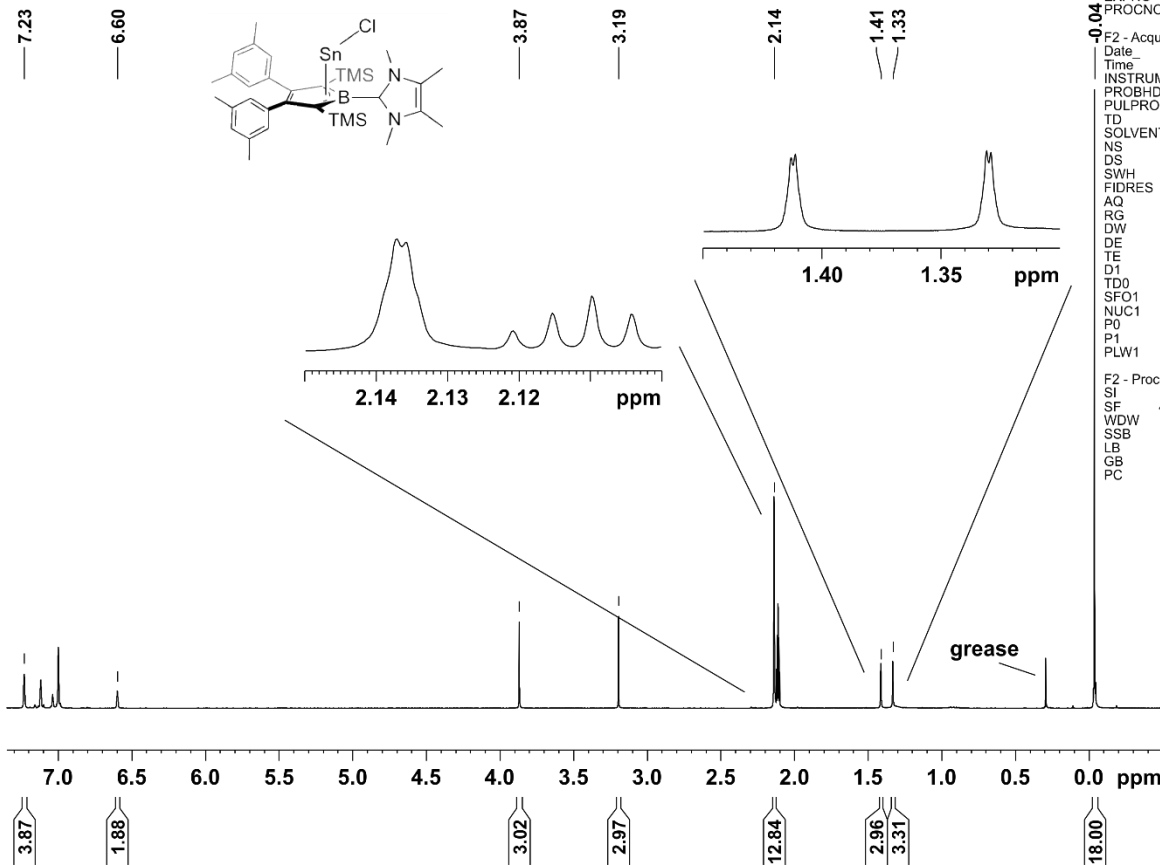

13C{1H}-NMR-spectrum of compound **6b** in CD2Cl2  
# referenced to CD2Cl2 at 54.24 ppm

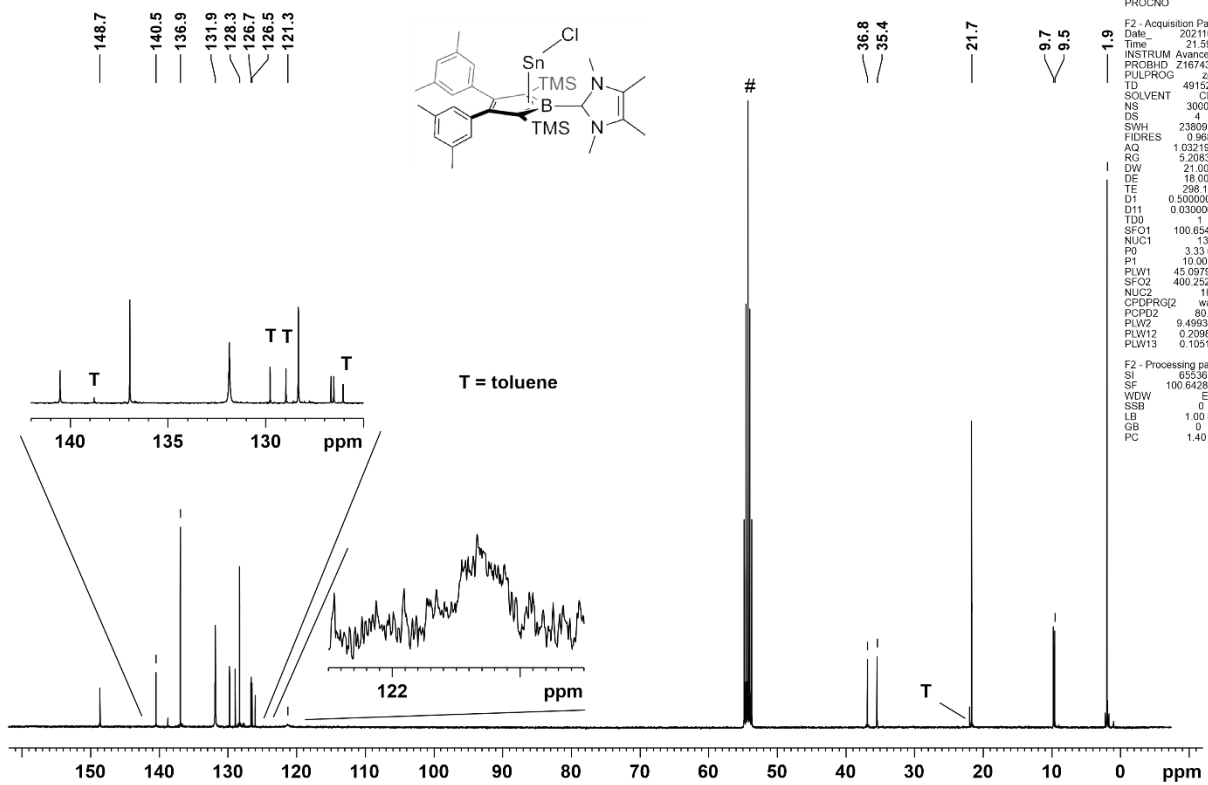



11B-NMR spectrum (background suppressed) of compound **6b** in CD<sub>2</sub>Cl<sub>2</sub>

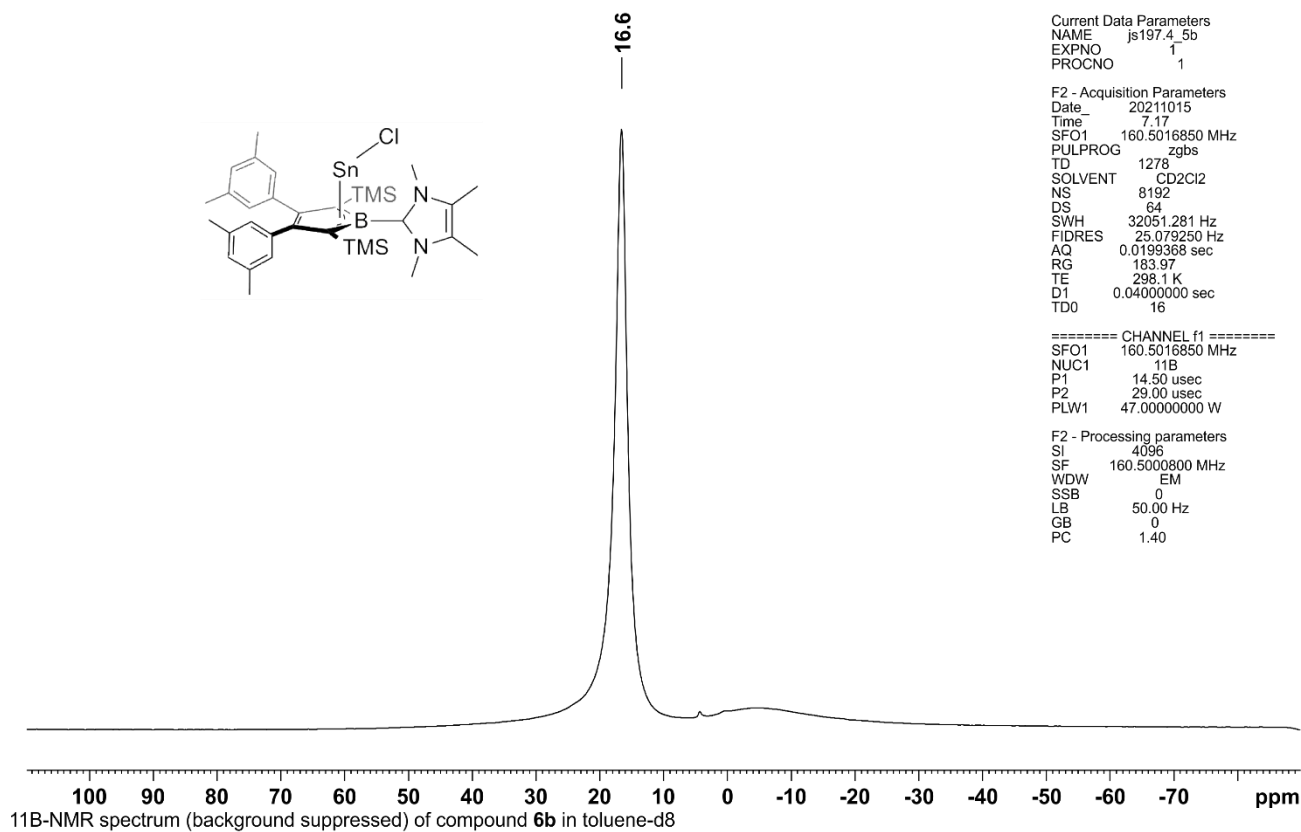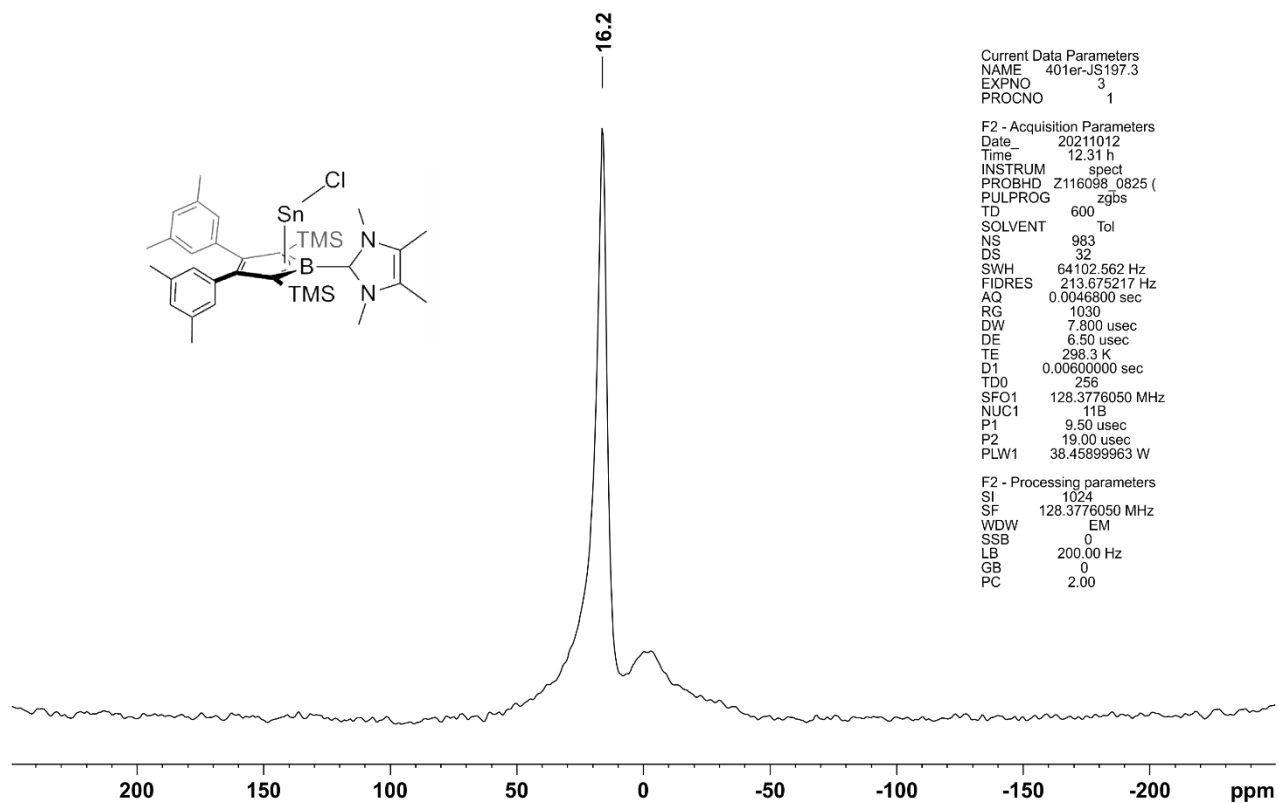

29Si-INEPT-NMR spectrum of compound **6b** in CD<sub>2</sub>Cl<sub>2</sub>

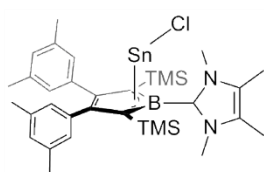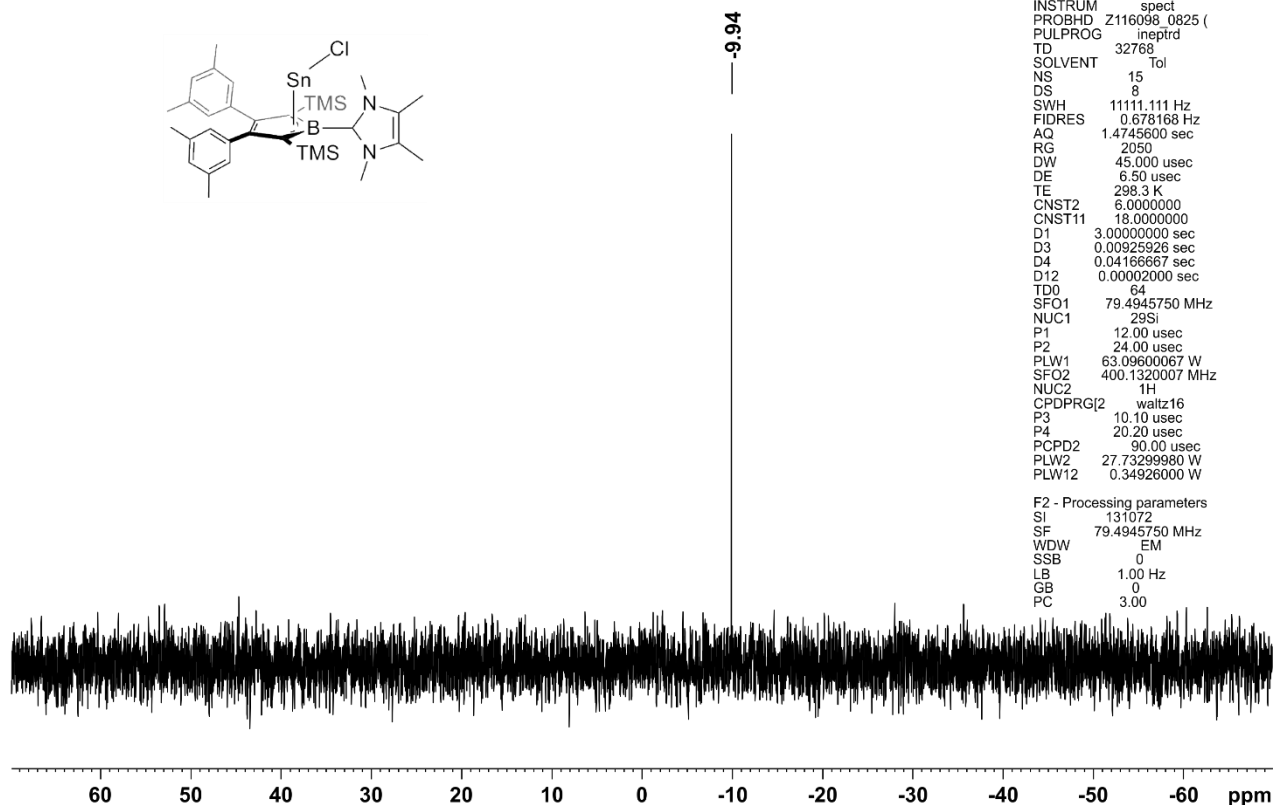

```

Current Data Parameters
NAME 401er-JS197.3
EXPNO 2
PROCNO 1

F2 - Acquisition Parameters
Date_ 20211012
Time 12.27 h
INSTRUM spect
PROBHD Z116095_0825 (
PULPROG ineptd
TD 32768
SOLVENT Tol
NS 15
DS 8
SWH 11111.111 Hz
FIDRES 0.678168 Hz
AQ 1.4745600 sec
RG 2050
DW 45.000 usec
DE 6.50 usec
TE 298.3 K
CNST2 6.0000000
CNST11 18.0000000
D1 3.00000000 sec
D3 0.00925926 sec
D4 0.04166667 sec
D12 0.00002000 sec
TD0 64
SFO1 79.4945750 MHz
NUC1 29Si
P1 12.00 usec
P2 24.00 usec
PLW1 63.0960067 W
SFO2 400.1320007 MHz
NUC2 1H
CPDPRG2 waltz16
P3 10.10 usec
P4 20.20 usec
PCPD2 90.00 usec
PLW2 27.73299980 W
PLW12 0.34926000 W

F2 - Processing parameters
SI 131072
SF 79.4945750 MHz
WDW EM
SSB 0
LB 1.00 Hz
GB 0
PC 3.00
    
```

119Sn-NMR spectrum of compound **6b** in CD<sub>2</sub>Cl<sub>2</sub>

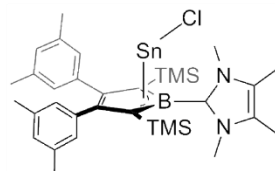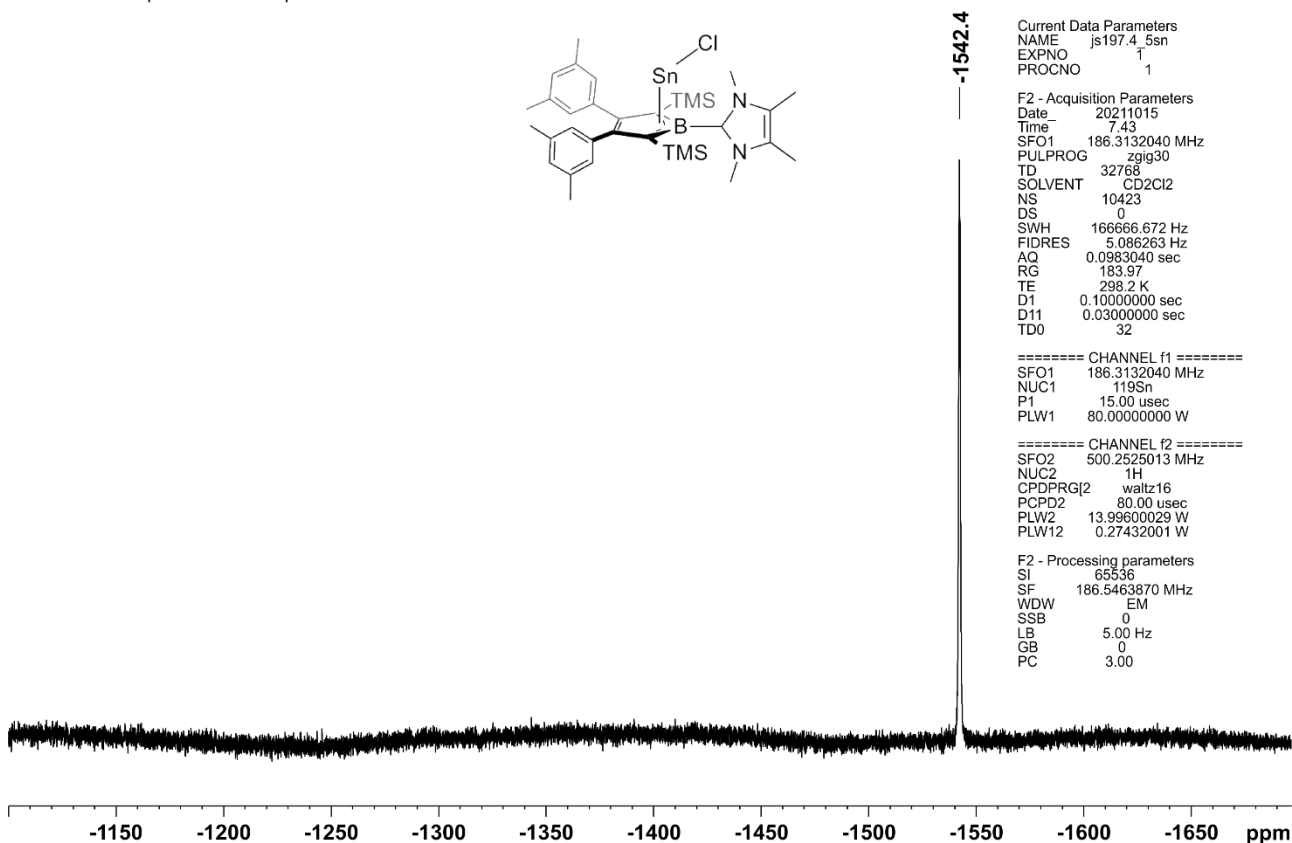

```

Current Data Parameters
NAME js197.4_5sn
EXPNO 1
PROCNO 1

F2 - Acquisition Parameters
Date_ 20211015
Time 7.43
SFO1 186.3132040 MHz
PULPROG zgig30
TD 32768
SOLVENT CD2Cl2
NS 10423
DS 0
SWH 166666.672 Hz
FIDRES 5.086263 Hz
AQ 0.0983040 sec
RG 183.97
TE 298.2 K
D1 0.10000000 sec
D11 0.03000000 sec
TD0 32

===== CHANNEL f1 =====
SFO1 186.3132040 MHz
NUC1 119Sn
P1 15.00 usec
PLW1 80.00000000 W

===== CHANNEL f2 =====
SFO2 500.2525013 MHz
NUC2 1H
CPDPRG2 waltz16
PCPD2 80.00 usec
PLW2 13.99600029 W
PLW12 0.27432001 W

F2 - Processing parameters
SI 65536
SF 186.5463870 MHz
WDW EM
SSB 0
LB 5.00 Hz
GB 0
PC 3.00
    
```

119Sn-NMR spectrum of compound **6b** in toluene-d8

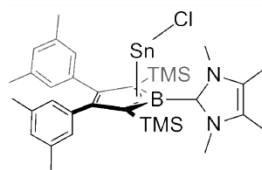

Current Data Parameters  
 NAME js197\_3\_5sn  
 EXPNO 1  
 PROCNO 1

F2 - Acquisition Parameters  
 Date\_ 20211015  
 Time 8.31  
 SFO1 186.3132040 MHz  
 PULPROG zgpg30  
 TD 32768  
 SOLVENT Tol  
 NS 13905  
 DS 0  
 SWH 166666.672 Hz  
 FIDRES 5.086263 Hz  
 AQ 0.0983040 sec  
 RG 183.97  
 TE 298.2 K  
 D1 0.10000000 sec  
 D11 0.03000000 sec  
 TD0 32

===== CHANNEL f1 =====  
 SFO1 186.3132040 MHz  
 NUC1 119Sn  
 P1 15.00 usec  
 PLW1 80.00000000 W

===== CHANNEL f2 =====  
 SFO2 500.2525013 MHz  
 NUC2 1H  
 CPDPRG[2] waltz16  
 PCPD2 80.00 usec  
 PLW2 13.99600029 W  
 PLW12 0.27432001 W

F2 - Processing parameters  
 SI 65536  
 SF 186.5463870 MHz  
 WDW EM  
 SSB 0  
 LB 5.00 Hz  
 GB 0  
 PC 3.00

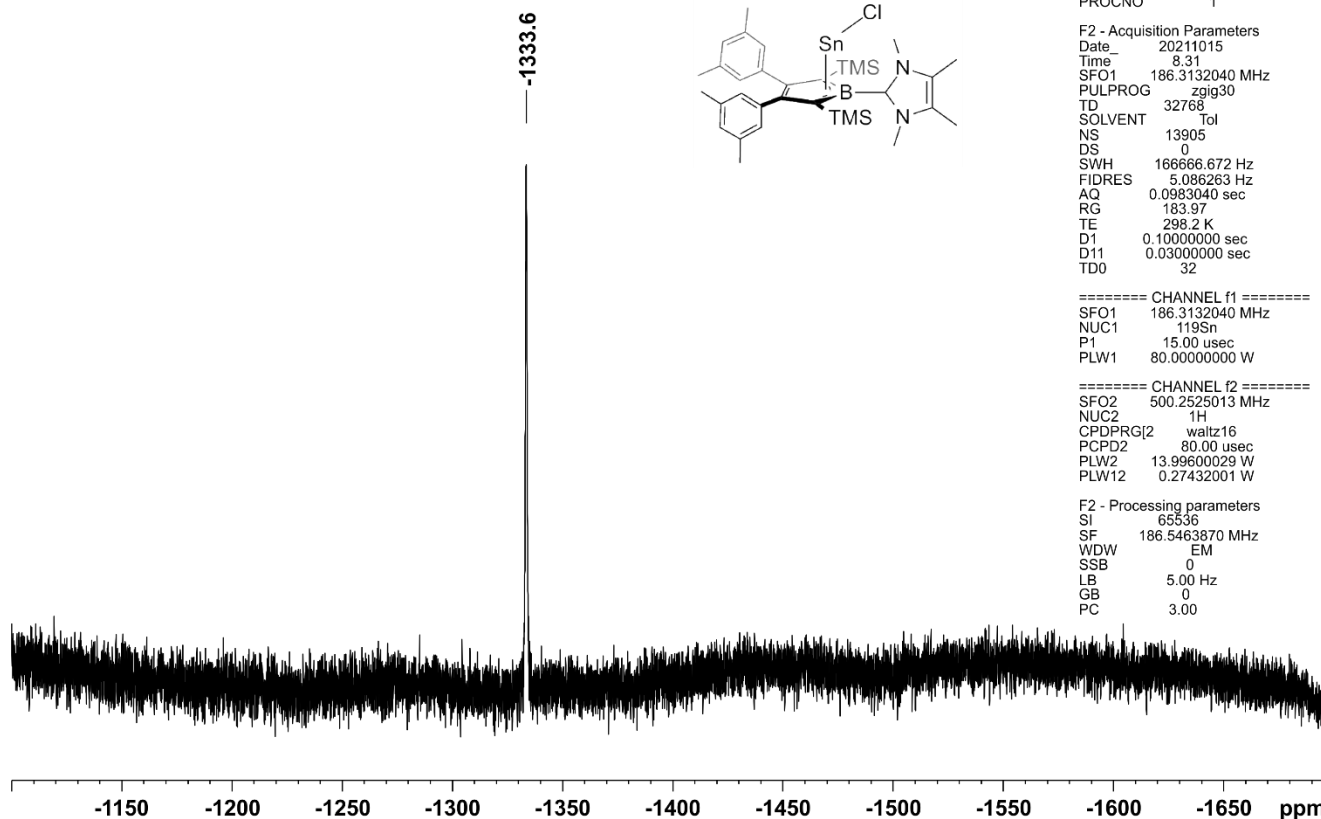

Acq. Data Name: jsarcev00018  
 Creation Parameters: Average(MS[1] Time:0.68..0.86)  
 External Sample Id: js-197

Experiment Date/Time: 10/14/2021 10:46:06 AM  
 Ionization Mode: FD+

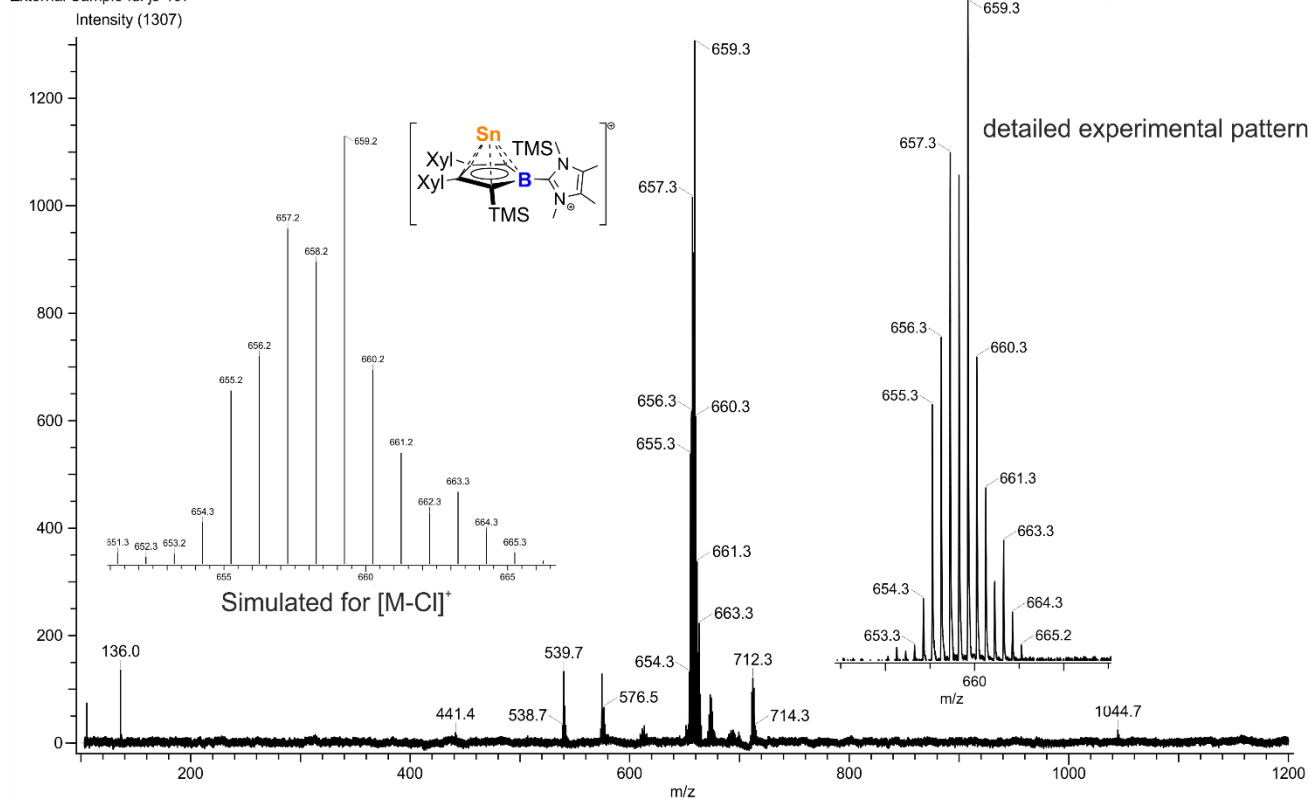

## Crystallographic Details

### General Data Acquisition and Processing

X-ray data for **1**, **2**, **3a**, **3b**, **4a**, **4b**, **5b** and **6b** were collected on Bruker APEX II CCD diffractometers with Mo K $\alpha$  radiation. If not otherwise stated the data were obtained from crystals cooled to  $-173$  °C via a cryo-stream. The data were integrated using SAINT implemented in Bruker's APEX3 programme suite.<sup>5</sup> SADABS was used for multi-scan absorption correction.<sup>6</sup> Two domains in twinned crystal of **2** were identified in the reciprocal lattice, sorted, integrated and absorption corrected as a two domain twin using TWINABS.<sup>7</sup> Structure solution was performed with SHELXT<sup>8</sup> and refined on  $F^2$  using SHELXL<sup>9</sup> within the graphical user interface of ShelXle.<sup>10</sup> In some cases DSR has been applied to treat disordered solvent molecules.<sup>11</sup> Hydrogen atoms were usually placed with a riding model. Further details on the individual data sets are tabulated in the analytical section of each compound.

### Crystallographic and Refinement Details 1

Bright orange crystals from a homogenous crop were picked from per-fluorinated oil and did only very slowly decompose.

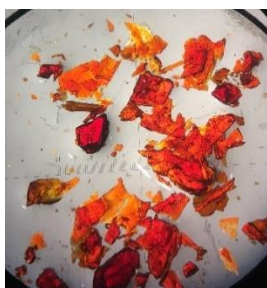

### Crystallographic and Refinement Details 2

Colourless crystals were found to be twinned. Two domains were identified from the reciprocal lattice and the data were integrated as a 2-component twin. Absorption correction was performed using TWINABS. Hydrogen atoms of a methyl group were found disordered and modelled accordingly.

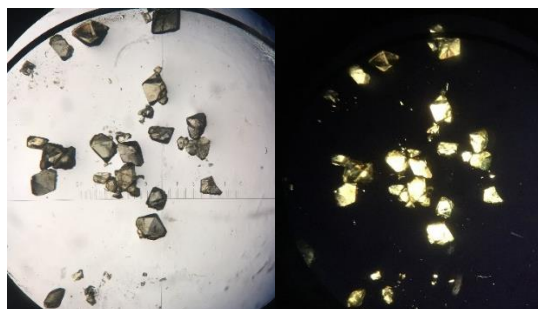

### Crystallographic and Refinement Details 3a

Colourless crystals were picked from per-fluorinated oil and crystal quality only deteriorated very slowly when exposed to ambient atmosphere.

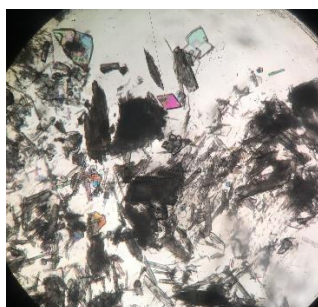

### Crystallographic and Refinement Details 3b

Colourless crystals were picked from per-fluorinated oil and crystal quality only deteriorated very slowly when exposed to ambient atmosphere. Small amounts of residual electron density were found on the other side of the borole and was modelled as a minor (2-3%) occupational disorder of the Ge-apex position und modelled using SADI, SIMU and RIGU restraints.

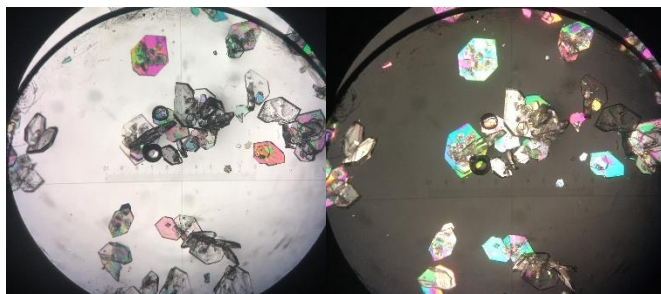

### Crystallographic and Refinement Details 4a

Colourless to pale yellow crystals were picked from per-fluorinated oil and crystal quality only deteriorated very slowly when exposed to ambient atmosphere. Crystals revealed notable physical deterioration and loss in crystallinity when shock-cooled to 100K in a N<sub>2</sub> cryostream. The data acquisition was thus performed at 110 K. Several inner reflections (1 0 0, 0 0 1, 1 0 1, 0 1 0, 1 1 0, 0 1 1, 1 1 1) seemed to be affected by the beam stop and have been omitted in the final refinement.

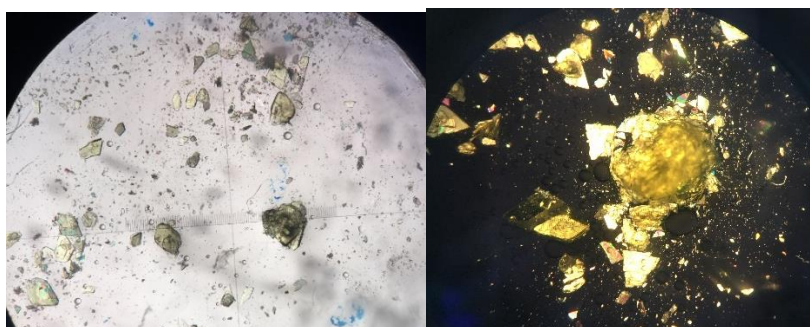

### Crystallographic and Refinement Details 4b

Brittle, colourless crystals were picked from per-fluorinated oil. When removed from the mother liquor crystals immediately deteriorated and turned opaque. Successful picking, mounting and data acquisition was performed on a relatively large block. Reflection 6 1 2 was omitted in the final refinement.

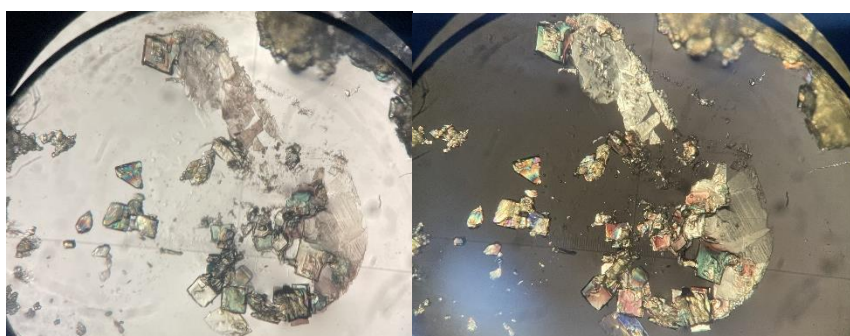

### Crystallographic and Refinement Details 5b

Colourless crystals were picked from per-fluorinated oil. The main molecule is located on a special position and the GeCl unit and the NHC are disordered and refined in part -1. The entire tertiary Xylyl-group is found slightly disordered and modelled accordingly over two positions using SADI SIMU and RIGU restraints. A disordered lattice toluene molecule occupying a special position was refined in Part -1.

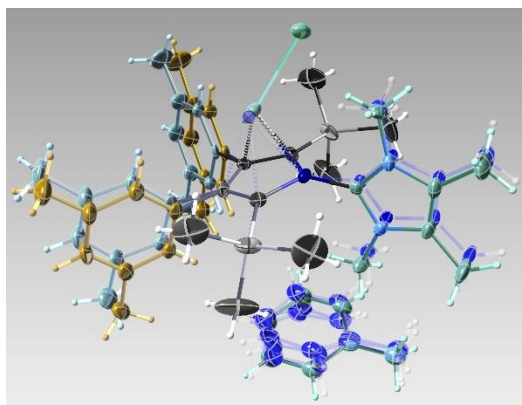

Depiction of the refinement modelling of disordered moieties. (Light Blue: Part 1; Orange: Part 2, Bluegreen: Part -1). Blue coloured moieties represent symmetry generated positions.

### Crystallographic and Refinement Details 6b

Colourless crystals were picked from per-fluorinated oil. The compound crystallised as a non-merohedral twin with the twin law  $0\ -1\ 0\ -1\ 0\ 0\ 0\ -1$ . The fractional contribution of the minor component refines to 0.48.<sup>12</sup>

Tabulated Crystallographic Details 1, 2, 3a, 3b, 4a, 4b, 5b and 6b

|                                       | 1                                                                | 2                                                                                                             | 3a                                                                | 3b                                                                                             | 4a                                                                | 4b                                                                  | 5b                                                                                                             | 6b                                                                                                             |
|---------------------------------------|------------------------------------------------------------------|---------------------------------------------------------------------------------------------------------------|-------------------------------------------------------------------|------------------------------------------------------------------------------------------------|-------------------------------------------------------------------|---------------------------------------------------------------------|----------------------------------------------------------------------------------------------------------------|----------------------------------------------------------------------------------------------------------------|
| CCDC number                           | 2119904                                                          | 2119903                                                                                                       | 2119907                                                           | 2119906                                                                                        | 2119905                                                           | 2119910                                                             | 2119908                                                                                                        | 2119909                                                                                                        |
| empirical formula                     | C <sub>26</sub> H <sub>36</sub> BClSi <sub>2</sub>               | C <sub>60</sub> H <sub>92</sub> B <sub>2</sub> Cl <sub>2</sub> Li <sub>4</sub> O <sub>2</sub> Si <sub>4</sub> | C <sub>55</sub> H <sub>88</sub> BGeSi <sub>2</sub>                | C <sub>52</sub> H <sub>72</sub> B <sub>2</sub> Cl <sub>2</sub> Ge <sub>2</sub> Si <sub>4</sub> | C <sub>52</sub> H <sub>81</sub> BSi <sub>2</sub> Sn               | C <sub>26</sub> H <sub>36</sub> B <sub>2</sub> ClSi <sub>2</sub> Sn | C <sub>73</sub> H <sub>104</sub> B <sub>2</sub> Cl <sub>2</sub> Ge <sub>2</sub> N <sub>4</sub> Si <sub>4</sub> | C <sub>73</sub> H <sub>104</sub> B <sub>2</sub> Cl <sub>2</sub> N <sub>4</sub> Si <sub>4</sub> Sn <sub>2</sub> |
| formula weight                        | 450.99                                                           | 1077.97                                                                                                       | 888.83                                                            | 1047.15                                                                                        | 891.84                                                            | 569.68                                                              | 1387.66                                                                                                        | 1479.86                                                                                                        |
| T / K                                 | 100(2)                                                           | 100(2)                                                                                                        | 100(2)                                                            | 100(2)                                                                                         | 110(2)                                                            | 100(2)                                                              | 100(2)                                                                                                         | 100(2)                                                                                                         |
| crystal system                        | triclinic                                                        | monoclinic                                                                                                    | monoclinic                                                        | orthorhombic                                                                                   | triclinic                                                         | orthorhombic                                                        | tetragonal                                                                                                     | orthorhombic                                                                                                   |
| space group (number)                  | $P\bar{1}$ (2)                                                   | $P2_1/n$ (14)                                                                                                 | $P2_1/n$ (14)                                                     | $Pbca$ (61)                                                                                    | $P\bar{1}$ (2)                                                    | $Pbca$ (61)                                                         | $P4_21m$ (113)                                                                                                 | $Iba2$ (45)                                                                                                    |
| a / Å                                 | 9.2086(10)                                                       | 14.109(2)                                                                                                     | 13.6558(16)                                                       | 19.048(2)                                                                                      | 15.8126(13)                                                       | 18.8007(8)                                                          | 18.172(3)                                                                                                      | 25.802(3)                                                                                                      |
| b / Å                                 | 11.0462(12)                                                      | 14.636(2)                                                                                                     | 15.5207(18)                                                       | 11.2539(12)                                                                                    | 16.2239(14)                                                       | 11.4507(5)                                                          | 18.172(3)                                                                                                      | 25.796(3)                                                                                                      |
| c / Å                                 | 14.4968(16)                                                      | 15.670(2)                                                                                                     | 26.337(3)                                                         | 25.727(3)                                                                                      | 22.9218(19)                                                       | 25.8667(11)                                                         | 11.769(3)                                                                                                      | 23.532(2)                                                                                                      |
| $\alpha$                              | 111.740(2)                                                       | 90                                                                                                            | 90                                                                | 90                                                                                             | 87.921(2)                                                         | 90                                                                  | 90                                                                                                             | 90                                                                                                             |
| $\beta$ / °                           | 94.288(2)                                                        | 90.751(3)                                                                                                     | 99.937(2)                                                         | 90                                                                                             | 74.394(2)                                                         | 90                                                                  | 90                                                                                                             | 90                                                                                                             |
| $\gamma$                              | 96.866(2)                                                        | 90                                                                                                            | 90                                                                | 90                                                                                             | 68.826(2)                                                         | 90                                                                  | 90                                                                                                             | 90                                                                                                             |
| V / Å <sup>3</sup>                    | 1348.5(3)                                                        | 3235.5(8)                                                                                                     | 5498.3(11)                                                        | 5514.9(10)                                                                                     | 5269.1(8)                                                         | 5568.6(4)                                                           | 3886.4(17)                                                                                                     | 15662(3)                                                                                                       |
| Z                                     | 2                                                                | 2                                                                                                             | 4                                                                 | 4                                                                                              | 4                                                                 | 8                                                                   | 2                                                                                                              | 8                                                                                                              |
| $\rho$ / Mg m <sup>-3</sup>           | 1.111                                                            | 1.106                                                                                                         | 1.074                                                             | 1.261                                                                                          | 1.124                                                             | 1.359                                                               | 1.186                                                                                                          | 1.255                                                                                                          |
| $\mu$ / mm <sup>-1</sup>              | 0.241                                                            | 0.212                                                                                                         | 0.632                                                             | 1.306                                                                                          | 0.561                                                             | 1.111                                                               | 0.944                                                                                                          | 0.808                                                                                                          |
| F(000)                                | 484                                                              | 1160                                                                                                          | 1932                                                              | 2192                                                                                           | 1904                                                              | 2336                                                                | 1468                                                                                                           | 6160                                                                                                           |
| crystal size / mm <sup>3</sup>        | 0.646×0.495×0.444                                                | 0.467×0.413×0.329                                                                                             | 0.356×0.136×0.095                                                 | 0.315×0.198×0.185                                                                              | 0.451×0.323×0.158                                                 | 0.239×0.232×0.152                                                   | 0.418×0.112×0.080                                                                                              | 0.168×0.090×0.052                                                                                              |
| Crystal colour                        | orange                                                           | colourless                                                                                                    | colourless                                                        | colourless                                                                                     | colourless                                                        | colourless                                                          | colourless                                                                                                     | colourless                                                                                                     |
| Crystal shape                         | block                                                            | block                                                                                                         | block                                                             | block                                                                                          | block                                                             | block                                                               | block                                                                                                          | block                                                                                                          |
| Radiation                             | Mo K $\alpha$ ( $\lambda$ =0.71073 Å)                            | Mo K $\alpha$ ( $\lambda$ =0.71073 Å)                                                                         | Mo K $\alpha$ ( $\lambda$ =0.71073 Å)                             | Mo K $\alpha$ ( $\lambda$ =0.71073 Å)                                                          | Mo K $\alpha$ ( $\lambda$ =0.71073 Å)                             | Mo K $\alpha$ ( $\lambda$ =0.71073 Å)                               | Mo K $\alpha$ ( $\lambda$ =0.71073 Å)                                                                          | Mo K $\alpha$ ( $\lambda$ =0.71073 Å)                                                                          |
| 2 $\theta$ range / °                  | 3.05 to 59.89 (0.71 Å)                                           | 3.81 to 52.15 (0.81 Å)                                                                                        | 3.06 to 59.16 (0.72 Å)                                            | 3.17 to 60.36 (0.71 Å)                                                                         | 3.70 to 59.42 (0.72 Å)                                            | 3.15 to 61.02 (0.70 Å)                                              | 3.17 to 55.00 (0.77 Å)                                                                                         | 2.23 to 53.52 (0.79 Å)                                                                                         |
| index ranges                          | -12 ≤ h ≤ 12<br>-15 ≤ k ≤ 15<br>-20 ≤ l ≤ 20                     | ≤ h ≤<br>≤ k ≤<br>≤ l ≤                                                                                       | -18 ≤ h ≤ 18<br>-21 ≤ k ≤ 21<br>-36 ≤ l ≤ 36                      | -26 ≤ h ≤ 26<br>-15 ≤ k ≤ 15<br>-36 ≤ l ≤ 36                                                   | -21 ≤ h ≤ 22<br>-22 ≤ k ≤ 22<br>-31 ≤ l ≤ 31                      | -26 ≤ h ≤ 26<br>-16 ≤ k ≤ 16<br>-36 ≤ l ≤ 36                        | -23 ≤ h ≤ 23<br>-23 ≤ k ≤ 23<br>-15 ≤ l ≤ 15                                                                   | -32 ≤ h ≤ 32<br>-32 ≤ k ≤ 32<br>-29 ≤ l ≤ 29                                                                   |
| Ref. collected                        | 54731                                                            | 6409                                                                                                          | 163225                                                            | 119874                                                                                         | 115246                                                            | 207042                                                              | 103383                                                                                                         | 111471                                                                                                         |
| indep. reflections/ R <sub>int</sub>  | 7795<br>R <sub>int</sub> = 0.0246<br>R <sub>sigma</sub> = 0.0152 | 6409<br>R <sub>int</sub> = 0.0439<br>R <sub>sigma</sub> = 0.0275                                              | 15429<br>R <sub>int</sub> = 0.0512<br>R <sub>sigma</sub> = 0.0261 | 8142<br>R <sub>int</sub> = 0.0542<br>R <sub>sigma</sub> = 0.0214                               | 29875<br>R <sub>int</sub> = 0.0354<br>R <sub>sigma</sub> = 0.0331 | 8515<br>R <sub>int</sub> = 0.0487<br>R <sub>sigma</sub> = 0.0124    | 4667<br>R <sub>int</sub> = 0.0492<br>R <sub>sigma</sub> = 0.0209                                               | 16679<br>R <sub>int</sub> = 0.0454<br>R <sub>sigma</sub> = 0.0302                                              |
| completeness to $\theta_{max}$        | 100.0 %                                                          | 100.0 %                                                                                                       | 100.0 %                                                           | 100.0 %                                                                                        | 100.0 %                                                           | 100.0 %                                                             | 100.0 %                                                                                                        | 100.0 %                                                                                                        |
| Data/Restr./Params.                   | 7795/0/281                                                       | 6409/0/347                                                                                                    | 15429/0/557                                                       | 8142/3/300                                                                                     | 29875/588/1181                                                    | 8515/0/290                                                          | 4667/631/380                                                                                                   | 16679/166/818                                                                                                  |
| Goof on F <sup>2</sup>                | 1.033                                                            | 1.043                                                                                                         | 1.036                                                             | 1.020                                                                                          | 1.016                                                             | 1.095                                                               | 1.079                                                                                                          | 1.039                                                                                                          |
| final R indices [ $I > 2\sigma(I)$ ]  | R <sub>1</sub> = 0.0315<br>wR <sub>2</sub> = 0.0877              | R <sub>1</sub> = 0.0413<br>wR <sub>2</sub> = 0.0977                                                           | R <sub>1</sub> = 0.0314<br>wR <sub>2</sub> = 0.0774               | R <sub>1</sub> = 0.0282<br>wR <sub>2</sub> = 0.0716                                            | R <sub>1</sub> = 0.0322<br>wR <sub>2</sub> = 0.0775               | R <sub>1</sub> = 0.0182<br>wR <sub>2</sub> = 0.0488                 | R <sub>1</sub> = 0.0264<br>wR <sub>2</sub> = 0.0611                                                            | R <sub>1</sub> = 0.0216<br>wR <sub>2</sub> = 0.0494                                                            |
| R indices (all data)                  | R <sub>1</sub> = 0.0357<br>wR <sub>2</sub> = 0.0909              | R <sub>1</sub> = 0.0566<br>wR <sub>2</sub> = 0.1045                                                           | R <sub>1</sub> = 0.0416<br>wR <sub>2</sub> = 0.0823               | R <sub>1</sub> = 0.0365<br>wR <sub>2</sub> = 0.0756                                            | R <sub>1</sub> = 0.0441<br>wR <sub>2</sub> = 0.0845               | R <sub>1</sub> = 0.0204<br>wR <sub>2</sub> = 0.0503                 | R <sub>1</sub> = 0.0289<br>wR <sub>2</sub> = 0.0622                                                            | R <sub>1</sub> = 0.0231<br>wR <sub>2</sub> = 0.0503                                                            |
| largest peak/hole [eÅ <sup>-3</sup> ] | 0.44/-0.26                                                       | 0.41/-0.29                                                                                                    | 0.43/-0.30                                                        | 0.52/-0.55                                                                                     | 1.07/-0.65                                                        | 0.48/-0.28                                                          | 0.26/-0.18                                                                                                     | 0.44/-0.48                                                                                                     |
| absorption correction                 | multi-scan                                                       | multi-scan                                                                                                    | multi-scan                                                        | multi-scan                                                                                     | multi-scan                                                        | multi-scan                                                          | multi-scan                                                                                                     | multi-scan                                                                                                     |
| miscellaneous                         |                                                                  | 2-component twin                                                                                              |                                                                   |                                                                                                |                                                                   |                                                                     | Flack X param. 0.010(3)                                                                                        | Flack X param. -0.022(5)                                                                                       |

## Computational Details

### Structure Optimisation, Frequency Calculation and Electronic Structure Analyses

Computational examination was performed using ORCA (version 4.2.1.).<sup>13</sup> All structures were optimised starting from (modified) experimental X-Ray structures (where available) on RI-BP86-D3BJ<sup>14</sup> def2SVP/J model chemistry<sup>15</sup> in the gas phase followed by a frequency calculation on the same level of theory and thermochemical corrections were taken from these frequency calculations. For numerical accuracy, grid6 and finalgrid7 were applied. No imaginary frequencies were observed confirming true minima. All structures were then reoptimized using BP86-D3BJ-def2TZVP/J model chemistry and all considered SCF energies, property calculations as well as NBO analyses<sup>16</sup> are based on these gas phase structures. Graphical depictions were created using ChemCraft or IBOview.<sup>17</sup> For tin an ECP-28, and for Pb an ECP-46 as automatically assigned in ORCA was applied.<sup>18</sup>

The model complexes  $[(\text{HC})_4\text{BH}]\text{E}$  ( $\text{E} = \text{Si}, \text{Ge}, \text{Sn}, \text{Pb}$ ) were computationally assessed with the same level of theory as described above and the electronic structure probed by QTAIM and ELF analyses. The energies of the (occupied) Kohn-Sham frontier molecular orbitals of these species were probed and revealed a raise in energy of those MO's that represent formal the combination of the E-centred  $p_x$  and  $p_y$ -orbitals (that enable in-plane interactions) with the borole-diides  $\pi$ -system when descending the group from Si(II) to heavier group 14 congeners (depicted in BLUE and BLACK). This is likely associated with an increasing borole<sub>centroid</sub>-E distance that leads to a mismatch overlap between the p-orbitals and the  $\pi$ -system. Conversely the MO bearing the (s) $p_z$  contribution with an orbital lobe above the E-vertex position is continuously decreasing in energy which accounts for decreased nucleophilicity towards transition metal fragments such as the experimentally probed  $[\text{W}(\text{CO})_5]$  (depicted in RED). Such fragments would then have to interact with the nucleophilic HOMO-lobe (depicted in blue) leading to an ever increasing angulation (i.e. deviation from linearity as observed in the Si(II)-complex) of the  $[\text{M}]\text{-E}(\text{Borole})_{\text{centroid}}$ . Similar observations were made for assessment of protonated structures.<sup>19</sup>

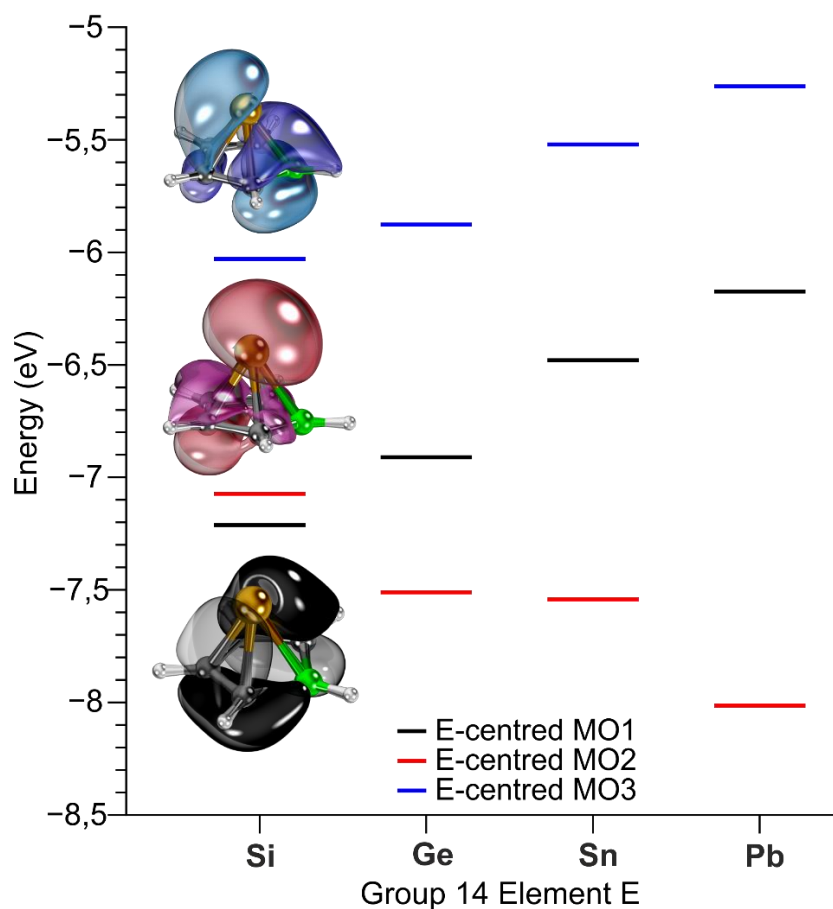



### QTAIM and ELF (Electron Localization Function)

Topology analyses according to Bader's quantum theory of atoms in molecules (QTAIM)<sup>20</sup> and ELF analyses on the model complexes [(HC)<sub>4</sub>BH]E (E = Si, Ge, Sn, Pb) were performed. The wavefunction files were created from single point calculations on structures obtained RI-PBE0-functional and def2-TZVPP/JK basis set on all elements except for Sn and Pb were all-electron "Sapporo-TZP-2012"(Sn) and "Sapporo-DKH3-TZP-2012"(Pb) basis sets without ECP and AutoAux were applied as implemented in ORCA 4.2.1.

The respective structures were obtained from optimisation in the gasphase (RI-BP86-D3BJ-def2TZVP/J). The QTAIM analyses were performed using the AIMAll programme suite.<sup>21</sup> The ELF analysis was performed using *multiwfn* software (version 3.6).<sup>22</sup>

The graphical representation was then created with UCSF ChimeraX.<sup>23</sup> Areas with negative Laplacian of the electron density (depicted in red) indicate areas of charge-concentration. In case of Si a clear valence shell charge concentration (VSCC) can be identified which is missing for the elements Ge to Pb.

The decreasing ELF blob sizes relative to the Si-lone pair of electron blob are given for Ge, Sn and Pb.

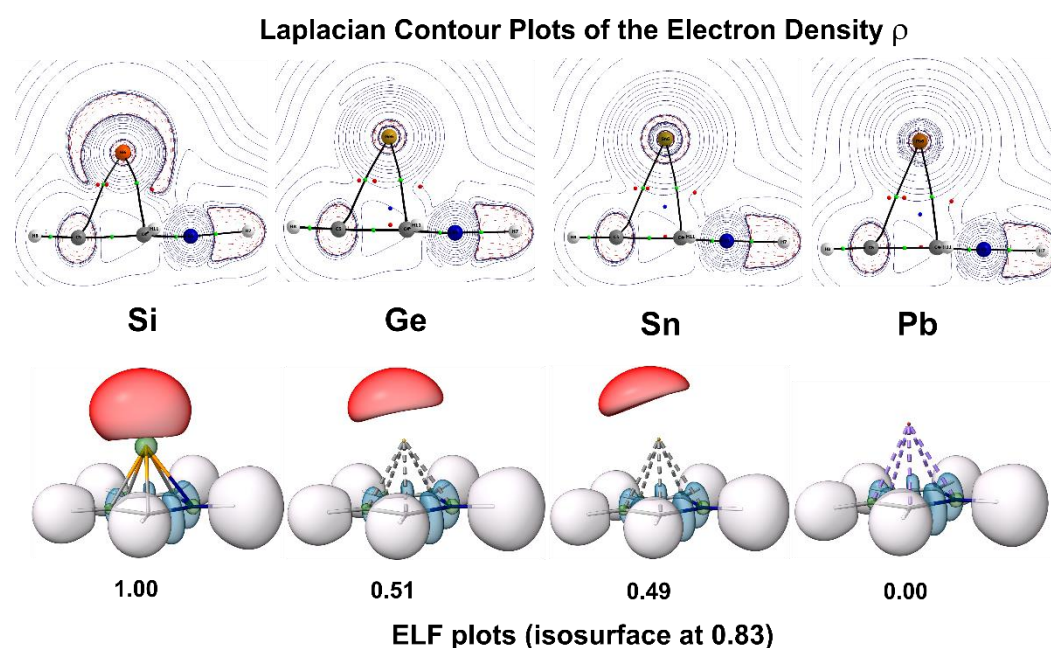

### Computational assessment of <sup>119</sup>Sn NMR shifts

Computational prediction of <sup>119</sup>Sn NMR spectroscopic properties of **4a**, **4b**, **6b** and hypothetical cationic B-NHC bound borole [borole-Sn]<sup>+</sup> E was performed using GIAO method and RIJK-PBE0<sup>24</sup> functional and def2-TZVP basis set (C,H) and def2-TZVPP basis set (all hetero-atoms) on gas phase structures previously optimised using the RI-BP86-D3BJ-def2TZVP/J model chemistry. For Sn, an all-electron basis set "Sapporo-TZP-2012" without ECP and AutoAux was applied as implemented in ORCA 4.2.1. A set of reference Sn-compounds were used to assess the general viability of the computational model to reproduce <sup>119</sup>Sn-NMR chemical shifts. We have previously applied a similar set of reference compounds for computational investigations of <sup>119</sup>Sn NMR chemical shifts.<sup>25</sup> Our assessment reveals that the computational method is particularly well suited for the accurate prediction of high-field-shifted signals but significantly lacks performance for low-valent, low-field shifted signals. As the compounds under investigation all range in the high-field shifted region the computational predictions can be confidentially discussed.

Calculated chemical shifts were obtained according to:

$$\delta_{\text{calc}} = \sigma_{\text{ref}} - \sigma_{\text{calc}}$$

$$\sigma_{\text{ref}}(^{119}\text{Sn}) = 2608.9 \text{ ppm for Me}_4\text{Sn.}$$

| Compound                                                                      | $\sigma_{\text{calc}}$ | $\delta_{\text{calc}}$ | $\delta_{\text{exp}}$ |
|-------------------------------------------------------------------------------|------------------------|------------------------|-----------------------|
| SnMe <sub>4</sub> (reference)                                                 | 2608.9                 | 0                      | 0                     |
| SnCl <sub>4</sub>                                                             | 2653.8                 | -44.9                  | -149 <sup>26</sup>    |
| SnCp* <sub>2</sub>                                                            | 4793.5                 | -2184.6                | -2129 <sup>27</sup>   |
| Sn(NTMS <sub>2</sub> ) <sub>2</sub>                                           | 2172.3                 | 436.6                  | 770 <sup>28</sup>     |
| Sn(2,6-Mes <sub>2</sub> (C <sub>6</sub> H <sub>3</sub> )) <sub>2</sub>        | 1219.3                 | 1389.6                 | 1971 <sup>29</sup>    |
| Sn(B[(N(Dipp)CH)] <sub>2</sub> ) <sub>2</sub>                                 | -591.1                 | 3200.0                 | 4755 <sup>30</sup>    |
| ( $\eta^3$ -Allyl)-Sn(2,6-Trip <sub>2</sub> (C <sub>6</sub> H <sub>3</sub> )) | 3800.9                 | -1192.0                | -957 <sup>31</sup>    |
| Sn[CH(TMS) <sub>2</sub> ] <sub>2</sub>                                        | 666.8                  | 1942.1                 | 2315 <sup>32</sup>    |
| (2,6-Trip <sub>2</sub> (C <sub>6</sub> H <sub>3</sub> ))SnPh                  | 1580.0                 | 1028.9                 | 1517 <sup>33</sup>    |
| [Trip <sub>3</sub> Sn] <sup>+</sup>                                           | 2020.8                 | 588.1                  | 714 <sup>34</sup>     |
| Jones' cation {[R(R')N]Sn} <sup>+</sup>                                       | 2794.6                 | -185.7                 | 46 <sup>35</sup>      |
| TripSnH <sub>3</sub>                                                          | 3048.6                 | -439.3                 | -416 <sup>36</sup>    |
| <b>4a</b>                                                                     | 4477.1                 | -1868.2                | -1897                 |
| <b>4b</b>                                                                     | 452.2                  | -1911.3                | -1952                 |
| <b>6b</b>                                                                     | 3555.7                 | -946.8 ( $\eta^3$ )    | -1438 <sup>a</sup>    |
| <b>E</b>                                                                      | 4.560.7                | -1951.8 ( $\eta^5$ )   | -1438 <sup>b</sup>    |

a) Averaged between shifts in toluene und dichloromethane; b) arbitrarily assigned shift of **6b** for comparison; Mes = 2,4,6-Me<sub>3</sub>(C<sub>6</sub>H<sub>2</sub>); Trip = 2,4,6-*i*Pr<sub>3</sub>(C<sub>6</sub>H<sub>2</sub>);

### Computational assessment of <sup>119</sup>Sn-NMR chemical shifts

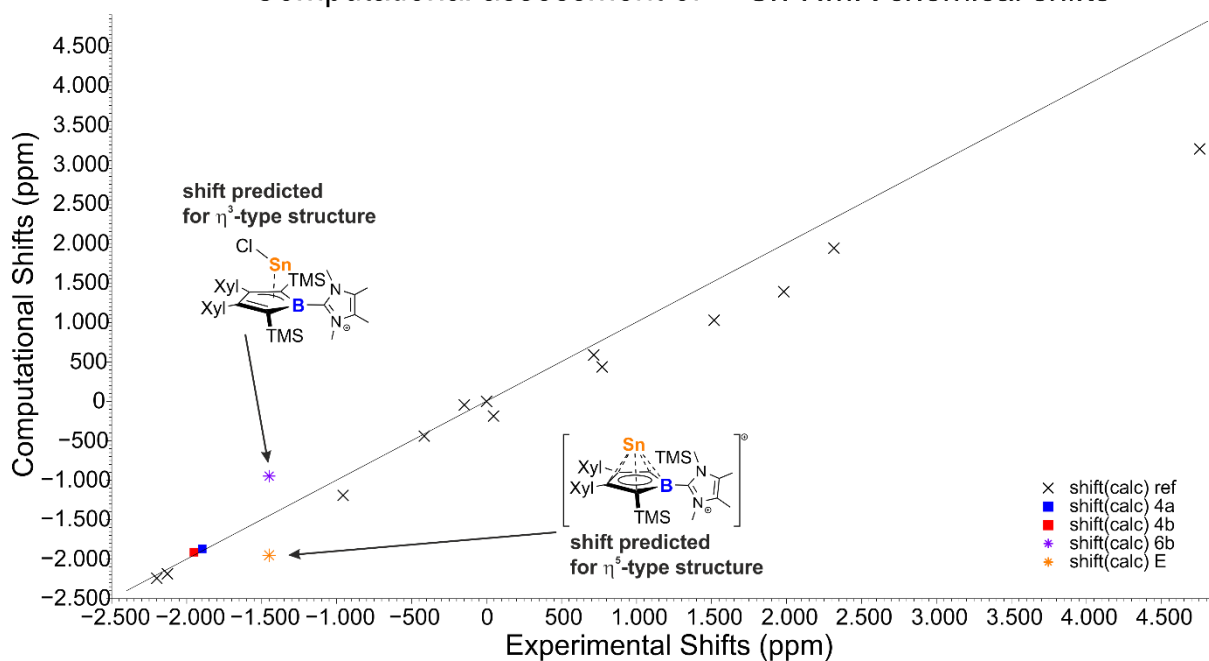

### XYZ-coordinates of optimised structures

All structures optimised at RI-BP86-D3BJ\def2TZVP\J level of theory (see above).

#### Molecular structure of borole-Si

E(SCF) = -469.870291549482 H

|    |              |             |             |
|----|--------------|-------------|-------------|
| B  | 8.333475891  | 5.359923080 | 5.248405029 |
| C  | 7.519131409  | 4.837047562 | 4.050520793 |
| C  | 8.345295420  | 4.847508629 | 2.868868020 |
| C  | 9.729002766  | 5.554702691 | 4.627083331 |
| C  | 9.666805221  | 5.276669800 | 3.213651295 |
| Si | 9.176052423  | 3.529997958 | 4.296784767 |
| H  | 8.011630956  | 5.426873867 | 6.398651571 |
| H  | 10.500301687 | 5.305154349 | 2.513666204 |
| H  | 8.053782020  | 4.510651038 | 1.875361792 |
| H  | 6.504446313  | 4.440932927 | 4.010028740 |
| H  | 10.680835346 | 5.797213170 | 5.099667974 |

#### Molecular structure of borole-Ge

E(SCF) = -2257.638347413681 H

|    |              |             |             |
|----|--------------|-------------|-------------|
| B  | 8.335814994  | 5.351940235 | 5.249368744 |
| C  | 7.514257181  | 4.837890641 | 4.048131790 |
| C  | 8.344514592  | 4.844528702 | 2.869634389 |
| C  | 9.733027189  | 5.558439645 | 4.627014281 |
| C  | 9.668661433  | 5.274548140 | 3.215103402 |
| Ge | 9.207223878  | 3.410087307 | 4.326623225 |
| H  | 8.006072556  | 5.445711470 | 6.396506203 |
| H  | 10.494955655 | 5.330322031 | 2.507586148 |
| H  | 8.046319403  | 4.535129401 | 1.868731605 |
| H  | 6.489415492  | 4.468513376 | 4.000258146 |
| H  | 10.680497080 | 5.829564124 | 5.093731584 |

#### Molecular structure of borole-Sn

E(SCF) = -394.808476624129 H

|    |              |             |             |
|----|--------------|-------------|-------------|
| B  | 8.337644445  | 5.346698119 | 5.248876203 |
| C  | 7.510044427  | 4.835232937 | 4.045437611 |
| C  | 8.343531635  | 4.844511728 | 2.869561303 |
| C  | 9.738660700  | 5.558985001 | 4.626887592 |
| C  | 9.669394470  | 5.275093728 | 3.215475209 |
| Sn | 9.262767701  | 3.195900179 | 4.380355196 |
| H  | 7.995777687  | 5.483023428 | 6.389516050 |
| H  | 10.483043662 | 5.374742314 | 2.497338330 |
| H  | 8.034681990  | 4.579628879 | 1.858558920 |
| H  | 6.469452174  | 4.513425071 | 3.986619808 |
| H  | 10.675760561 | 5.879433688 | 5.084063293 |

#### Molecular structure of borole-Pb

E(SCF) = -373.412876757961 H

|    |              |             |             |
|----|--------------|-------------|-------------|
| B  | 8.338554489  | 5.344347884 | 5.248303919 |
| C  | 7.507227189  | 4.838149191 | 4.043032102 |
| C  | 8.342090164  | 4.846701100 | 2.870263165 |
| C  | 9.740097560  | 5.563280672 | 4.625592451 |
| C  | 9.668883839  | 5.277586551 | 3.216417645 |
| Pb | 9.289579925  | 3.094390346 | 4.404008054 |
| H  | 7.991776496  | 5.497999848 | 6.386203291 |
| H  | 10.477395635 | 5.392260703 | 2.494130355 |
| H  | 8.030386538  | 4.597588217 | 1.855706139 |
| H  | 6.461451825  | 4.533281716 | 3.980068956 |
| H  | 10.673315793 | 5.901088845 | 5.078963439 |

#### Molecular structure of 4a

E(SCF) = -2849.83279149304 H

|    |              |             |             |
|----|--------------|-------------|-------------|
| Si | 5.663916000  | 4.195893380 | 4.038995020 |
| C  | 7.490772439  | 4.628564751 | 4.004331035 |
| B  | 8.305757859  | 5.354346122 | 5.118209688 |
| Si | 11.295926573 | 6.042530065 | 5.482293210 |
| C  | 8.435242192  | 4.282393983 | 2.954280468 |
| C  | 10.930079216 | 4.481807001 | 2.422312908 |
| C  | 7.748147338  | 5.950660471 | 6.455304417 |

|   |              |              |              |
|---|--------------|--------------|--------------|
| C | 9.791597666  | 5.277831272  | 4.652933692  |
| H | 8.891989329  | 4.672733854  | 7.749152410  |
| C | 8.157141944  | 5.478258698  | 7.713490801  |
| C | 7.656114115  | 6.006051367  | 8.907666129  |
| C | 6.713223139  | 7.039719079  | 8.818315029  |
| H | 6.306243458  | 7.461206115  | 9.739391088  |
| C | 6.274479659  | 7.551592678  | 7.589747658  |
| C | 6.806977227  | 6.992502568  | 6.421165490  |
| H | 6.489837630  | 7.368406624  | 5.448503246  |
| C | 5.143242694  | 3.841836751  | 5.816288124  |
| H | 4.069723301  | 3.601800638  | 5.857273713  |
| H | 5.332994632  | 4.698965368  | 6.475311462  |
| H | 5.692990514  | 2.980024721  | 6.224517929  |
| C | 4.646562474  | 5.652628961  | 3.398007801  |
| H | 4.916364132  | 5.924861006  | 2.367858624  |
| H | 4.804089748  | 6.538584792  | 4.029370084  |
| H | 3.572135122  | 5.414796551  | 3.411197512  |
| C | 5.278845927  | 2.653999540  | 3.018154501  |
| H | 5.430399219  | 2.810609506  | 1.942720429  |
| H | 4.232669662  | 2.351071028  | 3.178439071  |
| H | 5.919079018  | 1.811495823  | 3.321792660  |
| C | 12.174400459 | 4.753743897  | 6.553008731  |
| H | 12.518600025 | 3.899224588  | 5.951240749  |
| H | 11.494629869 | 4.367925100  | 7.328019940  |
| H | 13.053498494 | 5.179884540  | 7.059783996  |
| C | 12.506096998 | 6.741395708  | 4.213054825  |
| H | 13.019477534 | 5.961454881  | 3.637255253  |
| H | 13.266967037 | 7.347560547  | 4.728533222  |
| H | 11.985845010 | 7.393666917  | 3.496380949  |
| C | 10.750043782 | 7.474054891  | 6.576828257  |
| H | 10.156776623 | 8.199706154  | 6.001556859  |
| H | 11.633402158 | 7.996534057  | 6.975040301  |
| H | 10.130872438 | 7.143478896  | 7.420171647  |
| C | 8.140135168  | 3.726533285  | 1.617807544  |
| C | 7.237226611  | 4.392825395  | 0.782085965  |
| H | 6.721038217  | 5.269448341  | 1.174705297  |
| C | 7.014490939  | 3.968786534  | -0.534172077 |
| C | 6.003757300  | 4.723579009  | -1.406816746 |
| C | 6.394190603  | 6.215312528  | -1.475369582 |
| H | 7.390733958  | 6.337172034  | -1.923594851 |
| H | 6.412767600  | 6.677392793  | -0.479125990 |
| H | 5.670041089  | 6.770615112  | -2.090194712 |
| C | 4.602843300  | 4.588340644  | -0.772462867 |
| H | 3.855153544  | 5.128831908  | -1.372485006 |
| H | 4.580961153  | 4.998489642  | 0.246342920  |
| H | 4.301679973  | 3.532423621  | -0.714967823 |
| C | 5.945972702  | 4.175606430  | -2.840552900 |
| H | 5.219282597  | 4.755670569  | -3.427246622 |
| H | 5.627293460  | 3.123512750  | -2.862951470 |
| H | 6.920962264  | 4.252448957  | -3.343473500 |
| C | 7.732250400  | 2.858709483  | -1.000893586 |
| H | 7.580817230  | 2.525810118  | -2.024272621 |
| C | 8.647845768  | 2.170731789  | -0.190838286 |
| C | 9.461635681  | 0.969542272  | -0.687234583 |
| C | 9.101036446  | -0.267690935 | 0.162497171  |
| H | 8.031162867  | -0.504759871 | 0.072351684  |
| H | 9.320967549  | -0.100701940 | 1.225933266  |
| H | 9.679281871  | -1.142882857 | -0.170570229 |
| C | 9.187594100  | 0.647398286  | -2.163341452 |
| H | 9.440192993  | 1.495048257  | -2.817019144 |
| H | 8.134397715  | 0.381504641  | -2.334894970 |
| H | 9.802700374  | -0.209144947 | -2.474529244 |
| C | 10.965610538 | 1.278572752  | -0.524703837 |
| H | 11.568934921 | 0.415528205  | -0.845043086 |
| H | 11.224649945 | 1.511504858  | 0.516265994  |

|    |              |              |              |    |              |              |              |
|----|--------------|--------------|--------------|----|--------------|--------------|--------------|
| H  | 11.257071103 | 2.147182064  | -1.131101420 | B  | 9.031599431  | 5.570044338  | 8.438825422  |
| C  | 8.827878214  | 2.614451357  | 1.120606079  | Si | 6.481238923  | 5.505738487  | 10.173140725 |
| H  | 9.534565007  | 2.107025205  | 1.778152071  | Si | 11.621244131 | 4.895160998  | 6.977839208  |
| C  | 9.783037811  | 4.650426698  | 3.340245432  | C  | 8.904807446  | 3.766979542  | 10.001312669 |
| C  | 10.892306554 | 5.119906278  | 1.178859557  | C  | 5.470121775  | 6.124555493  | 8.707314786  |
| H  | 10.022142375 | 5.730393660  | 0.937536664  | H  | 5.251428970  | 5.304239322  | 8.006266663  |
| C  | 11.921716230 | 4.960079382  | 0.246694279  | H  | 6.003700746  | 6.907407002  | 8.152562299  |
| C  | 11.803983747 | 5.651064233  | -1.117018108 | H  | 4.507643990  | 6.535049217  | 9.048541511  |
| C  | 11.754707335 | 7.178942842  | -0.902313200 | C  | 10.207298854 | 4.596769300  | 8.176547455  |
| H  | 11.663556604 | 7.698446671  | -1.868249975 | C  | 10.087411032 | 3.561951559  | 9.193443791  |
| H  | 12.668714291 | 7.532431509  | -0.403798608 | C  | 6.732570226  | 6.925260108  | 11.388451982 |
| H  | 10.897586990 | 7.468353765  | -0.279160350 | H  | 7.315616365  | 7.729870460  | 10.917374946 |
| C  | 10.500999877 | 5.189938714  | -1.805079338 | H  | 7.270033366  | 6.600421924  | 12.290651833 |
| H  | 10.380243582 | 5.699838120  | -2.772941780 | H  | 5.766207149  | 7.345173101  | 11.706025027 |
| H  | 9.616573689  | 5.404039760  | -1.191240513 | C  | 5.502526111  | 4.107271885  | 10.978784336 |
| H  | 10.513310980 | 4.106089707  | -1.985598468 | H  | 5.454226930  | 3.228731735  | 10.317420219 |
| C  | 12.985003533 | 5.323944046  | -2.042233458 | H  | 4.469675107  | 4.439804558  | 11.165112859 |
| H  | 12.848287733 | 5.831033741  | -3.008139496 | H  | 5.935568755  | 3.777711873  | 11.931412539 |
| H  | 13.059298962 | 4.244420857  | -2.239249326 | C  | 10.891791617 | 5.176112615  | 5.262357456  |
| H  | 13.941513969 | 5.664217140  | -1.619522718 | H  | 11.668486433 | 5.474563229  | 4.542190095  |
| C  | 13.013496714 | 4.155124137  | 0.600592297  | H  | 10.127783854 | 5.965520435  | 5.290723578  |
| H  | 13.818773530 | 4.015045226  | -0.115651965 | H  | 10.419361029 | 4.256795943  | 4.883147691  |
| C  | 13.090339156 | 3.509079820  | 1.843322836  | C  | 12.503587821 | 6.450456245  | 7.571790371  |
| C  | 14.279137224 | 2.627288140  | 2.245556141  | H  | 13.322849147 | 6.727508251  | 6.891354378  |
| C  | 13.773009732 | 1.213018083  | 2.600844082  | H  | 12.931584310 | 6.295860522  | 8.573279212  |
| H  | 13.281051669 | 0.746323209  | 1.735500004  | H  | 11.801344986 | 7.293813456  | 7.629386930  |
| H  | 13.050361158 | 1.236299219  | 3.428008899  | C  | 12.872457233 | 3.489205546  | 6.878918579  |
| H  | 14.613812354 | 0.572250100  | 2.906265981  | H  | 12.425113934 | 2.562663974  | 6.493617935  |
| C  | 15.317742179 | 2.498944532  | 1.121492186  | H  | 13.318841103 | 3.260768218  | 7.856257316  |
| H  | 14.883189182 | 2.047550848  | 0.217740828  | H  | 13.682681544 | 3.782336504  | 6.192870584  |
| H  | 16.143482526 | 1.853922967  | 1.454470299  | C  | 11.086736785 | 2.513493088  | 9.505973124  |
| H  | 15.746049764 | 3.474266227  | 0.849093064  | C  | 11.217576274 | 1.344860213  | 8.746231352  |
| C  | 14.965104464 | 3.251964698  | 3.479487576  | H  | 10.559665806 | 1.192733200  | 7.886425946  |
| H  | 15.818475742 | 2.634820056  | 3.798916245  | C  | 12.168579019 | 0.373112878  | 9.068833314  |
| H  | 14.270945343 | 3.335627111  | 4.327014389  | C  | 12.985788437 | 0.585969147  | 10.188120928 |
| H  | 15.335479868 | 4.261392414  | 3.249984314  | H  | 13.726963924 | -0.171041758 | 10.457969922 |
| C  | 12.031225910 | 3.682236690  | 2.741016992  | C  | 12.872021981 | 1.738438234  | 10.973654937 |
| H  | 12.044128775 | 3.177713293  | 3.709186870  | C  | 11.916696130 | 2.699108180  | 10.616944495 |
| C  | 8.102922761  | 5.502211627  | 10.285889014 | H  | 11.802842396 | 3.602828144  | 11.218982347 |
| C  | 5.236024121  | 6.680933496  | 7.569984713  | C  | 12.330606064 | -0.858218709 | 8.215797705  |
| C  | 5.795585211  | 9.902894497  | 8.328899993  | H  | 11.388201858 | -1.129941139 | 7.720758486  |
| H  | 6.030008286  | 9.656920536  | 9.373615245  | H  | 12.668944403 | -1.718136273 | 8.810014545  |
| H  | 6.718424925  | 10.265751123 | 7.853929722  | H  | 13.079983817 | -0.690163503 | 7.425688026  |
| H  | 5.061257707  | 10.722889858 | 8.330248115  | C  | 13.738135377 | 1.941951948  | 12.190005660 |
| C  | 4.880017588  | 9.121151283  | 6.142007520  | H  | 14.491385126 | 1.148652327  | 12.282408972 |
| H  | 5.760875799  | 9.491752874  | 5.598366733  | H  | 13.131530610 | 1.942025018  | 13.108592428 |
| H  | 4.438358828  | 8.298270344  | 5.561548805  | H  | 14.262663634 | 2.908002193  | 12.148877477 |
| H  | 4.141659948  | 9.935196381  | 6.180053961  | C  | 8.632066571  | 2.970003900  | 11.214150424 |
| C  | 3.945070052  | 8.192309448  | 8.261246830  | C  | 8.543371027  | 1.574194219  | 11.196197522 |
| H  | 3.531016964  | 7.319157899  | 7.736632466  | H  | 8.622186202  | 1.047545961  | 10.243220829 |
| H  | 4.131244972  | 7.900628130  | 9.303949368  | C  | 8.364481649  | 0.845956663  | 12.378165448 |
| H  | 3.184815007  | 8.988371896  | 8.261707144  | C  | 8.267316421  | 1.544358756  | 13.587568527 |
| C  | 8.730713634  | 6.672289767  | 11.073118309 | H  | 8.125233005  | 0.984215450  | 14.515646954 |
| H  | 9.057076997  | 6.334203476  | 12.068529645 | C  | 8.352076647  | 2.943173164  | 13.638476696 |
| H  | 9.604827323  | 7.073927261  | 10.540535187 | C  | 8.542275386  | 3.641697382  | 12.442985216 |
| H  | 8.015645499  | 7.494552023  | 11.211981412 | H  | 8.636612058  | 4.729043783  | 12.458243100 |
| C  | 6.878069949  | 4.962762256  | 11.054234367 | C  | 8.287414899  | -0.658685721 | 12.337600443 |
| H  | 6.414140068  | 4.128367161  | 10.508744312 | H  | 7.453318904  | -0.997979453 | 11.704967599 |
| H  | 7.177140118  | 4.602053995  | 12.050300154 | H  | 8.1440666985 | -1.079627992 | 13.341316505 |
| H  | 6.114043108  | 5.740254094  | 11.190946870 | H  | 9.209035579  | -1.087739009 | 11.916158874 |
| C  | 9.144989333  | 4.377688612  | 10.184039344 | C  | 8.214596018  | 3.679895944  | 14.945967505 |
| H  | 9.436425250  | 4.051571086  | 11.192944664 | H  | 8.733357668  | 4.647598632  | 14.916249924 |
| H  | 8.747377603  | 3.501871749  | 9.650852582  | H  | 8.621671760  | 3.094893457  | 15.782207092 |
| H  | 10.054862126 | 4.713377458  | 9.665363837  | H  | 7.155453662  | 3.882012027  | 15.172762479 |
| Sn | 9.025753031  | 3.000304445  | 4.924802539  |    |              |              |              |
| B  | 8.333475891  | 5.359923080  | 5.248405029  |    |              |              |              |

**Molecular structure of 4b**  
**E(SCF) = -2291,75234160886**

|    |             |             |             |
|----|-------------|-------------|-------------|
| Sn | 8.196081632 | 3.314477141 | 7.729551414 |
| C  | 8.156198892 | 4.931228935 | 9.541809995 |
| Cl | 8.745320074 | 7.138662740 | 7.601138395 |

**Molecular structure of 6b**

**E(SCF) = -2675,44563554094**

|    |              |              |              |
|----|--------------|--------------|--------------|
| Sn | 17.947321499 | 12.953497178 | 14.817024398 |
| B  | 20.064251446 | 12.833037358 | 16.314501199 |
| Cl | 16.338261759 | 11.149276548 | 15.585778353 |
| Si | 20.030030959 | 9.842819270  | 15.670404576 |
| Si | 20.618578979 | 15.832817523 | 16.167887856 |

|   |              |              |              |
|---|--------------|--------------|--------------|
| C | 20.586672359 | 14.075581165 | 15.542428351 |
| C | 20.779217748 | 13.649532657 | 14.199236533 |
| C | 20.420028142 | 12.264599643 | 14.027124669 |
| C | 19.996731641 | 11.671359010 | 15.287958479 |
| N | 19.133457491 | 12.626467890 | 18.820265662 |
| N | 21.276376443 | 12.716790157 | 18.571341416 |
| C | 20.104130279 | 12.713030786 | 17.874697051 |
| C | 21.046833985 | 12.636490115 | 19.942788037 |
| C | 19.684750248 | 12.584324344 | 20.101948198 |
| C | 22.592056672 | 12.721453833 | 17.948024508 |
| H | 23.203835449 | 13.532511855 | 18.362440039 |
| H | 22.451203259 | 12.884412662 | 16.873353718 |
| H | 23.095933051 | 11.760057073 | 18.116802653 |
| C | 22.150722553 | 12.612074424 | 20.938348758 |
| H | 21.743299719 | 12.542661624 | 21.953634365 |
| H | 22.767194421 | 13.522528349 | 20.885830771 |
| H | 22.818563323 | 11.750448526 | 20.785893667 |
| C | 18.861962612 | 12.497512526 | 21.337441663 |
| H | 19.512477798 | 12.507129725 | 22.219970390 |
| H | 18.269594276 | 11.570373484 | 21.370484557 |
| H | 18.165420883 | 13.344533731 | 21.425881172 |
| C | 17.703883873 | 12.634669852 | 18.540520465 |
| H | 17.170196989 | 12.209583631 | 19.396108941 |
| H | 17.483412493 | 12.024937786 | 17.656870743 |
| H | 17.355739907 | 13.662839127 | 18.370317777 |
| C | 21.845955659 | 9.326669667  | 15.531070570 |
| H | 21.983936914 | 8.261449058  | 15.771740384 |
| H | 22.480767996 | 9.915408847  | 16.210189451 |
| H | 22.208588593 | 9.494360172  | 14.505962140 |
| C | 19.447629707 | 9.546724315  | 17.444178481 |
| H | 19.494358766 | 8.470031230  | 17.668119792 |
| H | 18.401250034 | 9.862619247  | 17.563440376 |
| H | 20.063084146 | 10.066829413 | 18.191782517 |
| C | 19.012256958 | 8.708434584  | 14.563546102 |
| H | 19.006677692 | 7.693102573  | 14.990272415 |
| H | 19.430948761 | 8.649746319  | 13.550743230 |
| H | 17.971460026 | 9.054646642  | 14.497207324 |
| C | 19.598646689 | 15.928796443 | 17.763044940 |
| H | 19.524956679 | 16.971701010 | 18.106974798 |
| H | 20.044773020 | 15.343323878 | 18.580637727 |
| H | 18.576495052 | 15.558348585 | 17.595844383 |
| C | 22.357532390 | 16.435055840 | 16.624620584 |
| H | 22.301751696 | 17.404046377 | 17.144421335 |
| H | 22.989190827 | 16.569119228 | 15.736214493 |
| H | 22.865735343 | 15.726549117 | 17.295632846 |
| C | 19.859965189 | 17.035998540 | 14.929068905 |
| H | 19.817263300 | 18.055094274 | 15.343089634 |
| H | 18.834633013 | 16.727214361 | 14.676314796 |
| H | 20.436084543 | 17.066663833 | 13.994487174 |
| C | 21.222046647 | 14.504801923 | 13.079522879 |
| C | 22.424774885 | 15.222299206 | 13.180822002 |
| H | 23.025681392 | 15.112701218 | 14.085210246 |
| C | 22.872992121 | 16.047581216 | 12.145516652 |
| C | 22.102368638 | 16.131751778 | 10.977335059 |
| H | 22.443722656 | 16.767188886 | 10.155513712 |
| C | 20.908554378 | 15.412952831 | 10.835245708 |
| C | 20.479219688 | 14.607279117 | 11.895485838 |
| H | 19.547548387 | 14.045135433 | 11.807028317 |
| C | 24.143791287 | 16.845355722 | 12.292402219 |
| H | 23.932084957 | 17.857172579 | 12.674371316 |
| H | 24.660351973 | 16.962126371 | 11.329410946 |
| H | 24.836413559 | 16.367084804 | 12.998681708 |
| C | 20.100002465 | 15.490441181 | 9.565245402  |
| H | 19.058116562 | 15.776488644 | 9.772668691  |
| H | 20.071261883 | 14.513760042 | 9.058180040  |
| H | 20.521715382 | 16.223714944 | 8.864995089  |
| C | 20.613150711 | 11.528849811 | 12.760109598 |
| C | 21.879431531 | 11.519938826 | 12.155583371 |
| H | 22.695124346 | 12.067896752 | 12.630868014 |
| C | 22.107975596 | 10.838331442 | 10.955150947 |
| C | 21.044574645 | 10.144152823 | 10.364947379 |
| H | 21.211120398 | 9.608186858  | 9.426565916  |

|   |              |              |              |
|---|--------------|--------------|--------------|
| C | 19.768032718 | 10.129780439 | 10.944199370 |
| C | 19.567926303 | 10.834858448 | 12.134487219 |
| H | 18.572687457 | 10.855971248 | 12.585455247 |
| C | 23.465737248 | 10.882553594 | 10.301475608 |
| H | 23.561696669 | 10.114301474 | 9.522487421  |
| H | 24.269110402 | 10.729064852 | 11.036414285 |
| H | 23.641455491 | 11.862447214 | 9.830090779  |
| C | 18.637069613 | 9.356526915  | 10.316440578 |
| H | 18.524725649 | 8.369799232  | 10.794053866 |
| H | 18.810434195 | 9.188215747  | 9.244872385  |
| H | 17.678987919 | 9.881564021  | 10.434803832 |

#### Molecular structure of [E]<sup>+</sup>

E(SCF) = -2214.948785791217 H

|    |              |              |              |
|----|--------------|--------------|--------------|
| Sn | 18.447092340 | 13.252393247 | 14.715028928 |
| B  | 20.259189037 | 12.800798725 | 16.337752004 |
| Si | 20.006914802 | 9.800170594  | 15.623351041 |
| Si | 20.537493795 | 15.876697787 | 16.168951619 |
| C  | 20.576623718 | 14.095453361 | 15.545707181 |
| C  | 20.770161147 | 13.676439268 | 14.166522098 |
| C  | 20.534846956 | 12.250811410 | 14.025236183 |
| C  | 20.203793284 | 11.649906777 | 15.307626257 |
| N  | 19.181867029 | 12.495818098 | 18.765558100 |
| N  | 21.308673969 | 12.850820127 | 18.687760512 |
| C  | 20.209361668 | 12.703408856 | 17.903095303 |
| C  | 20.980405336 | 12.744780706 | 20.038150631 |
| C  | 19.626141379 | 12.523510635 | 20.088584255 |
| C  | 22.664339527 | 13.029742758 | 18.182678188 |
| H  | 23.112472476 | 13.930926957 | 18.618262798 |
| H  | 22.613751990 | 13.137014586 | 17.094511743 |
| H  | 23.280618519 | 12.158057806 | 18.438406989 |
| C  | 21.993206413 | 12.858367591 | 21.119694799 |
| H  | 21.515716554 | 12.739559977 | 22.098620539 |
| H  | 22.493263301 | 13.838329299 | 21.107995321 |
| H  | 22.770910579 | 12.085111616 | 21.031322765 |
| C  | 18.711725694 | 12.333568122 | 21.244479117 |
| H  | 19.269687420 | 12.419204656 | 22.183534490 |
| H  | 18.235317108 | 11.341657787 | 21.229751537 |
| H  | 17.912496441 | 13.089352557 | 21.260823355 |
| C  | 17.793609734 | 12.281689415 | 18.389068200 |
| H  | 17.408321523 | 11.377621950 | 18.875859832 |
| H  | 17.745890999 | 12.148633061 | 17.304105655 |
| H  | 17.177546706 | 13.142959428 | 18.679543974 |
| C  | 21.280044026 | 8.827799096  | 14.641845359 |
| H  | 21.264506293 | 7.772512263  | 14.953215414 |
| H  | 22.294280731 | 9.214836319  | 14.816881186 |
| H  | 21.088349423 | 8.869170556  | 13.562135814 |
| C  | 20.316714475 | 9.492715751  | 17.461434499 |
| H  | 20.336551165 | 8.409449789  | 17.652568463 |
| H  | 19.535671671 | 9.921077560  | 18.104129870 |
| H  | 21.285372219 | 9.900954815  | 17.784667855 |
| C  | 18.258610452 | 9.218393873  | 15.221467253 |
| H  | 18.123594751 | 8.165144149  | 15.509871554 |
| H  | 18.042754496 | 9.296042092  | 14.147249897 |
| H  | 17.503124536 | 9.807842480  | 15.763585042 |
| C  | 19.541248047 | 15.885886498 | 17.775634464 |
| H  | 19.388410102 | 16.921636002 | 18.113424824 |
| H  | 20.046759080 | 15.348761268 | 18.591081745 |
| H  | 18.546650722 | 15.436084152 | 17.636463679 |
| C  | 22.258352382 | 16.546568841 | 16.550846876 |
| H  | 22.170883153 | 17.466738506 | 17.148086422 |
| H  | 22.808918450 | 16.798502894 | 15.635207905 |
| H  | 22.867360707 | 15.835470604 | 17.126459359 |
| C  | 19.680005274 | 16.994339498 | 14.922271525 |
| H  | 19.658254091 | 18.031896927 | 15.287743642 |
| H  | 18.636938943 | 16.684705249 | 14.753836524 |
| H  | 20.193804869 | 16.985963967 | 13.951721031 |
| C  | 21.220055722 | 14.539001748 | 13.056051553 |
| C  | 22.409394400 | 15.261534559 | 13.209811601 |
| H  | 22.972646770 | 15.166685479 | 14.139137618 |
| C  | 22.901569220 | 16.073958697 | 12.179645499 |
| C  | 22.179284435 | 16.138624019 | 10.983068502 |

|   |              |              |              |
|---|--------------|--------------|--------------|
| H | 22.553676838 | 16.765647157 | 10.169784524 |
| C | 20.991307620 | 15.414765446 | 10.794294488 |
| C | 20.524676380 | 14.616164530 | 11.841078313 |
| H | 19.606701363 | 14.039656193 | 11.709092859 |
| C | 24.164149040 | 16.873477539 | 12.368960969 |
| H | 23.934531021 | 17.884949881 | 12.739960309 |
| H | 24.711221471 | 16.990876994 | 11.424215834 |
| H | 24.834234162 | 16.399535471 | 13.098801181 |
| C | 20.237585140 | 15.504527056 | 9.493709937  |
| H | 19.824651741 | 16.513710101 | 9.344595504  |
| H | 19.404842916 | 14.790440630 | 9.463677467  |
| H | 20.897064785 | 15.296533887 | 8.638840237  |
| C | 20.724736220 | 11.520831294 | 12.753912869 |
| C | 21.984103110 | 11.533608839 | 12.147056010 |
| H | 22.791420906 | 12.111450300 | 12.600331234 |
| C | 22.220961790 | 10.816642640 | 10.965855703 |
| C | 21.165369299 | 10.093044892 | 10.401240111 |
| H | 21.338068460 | 9.537387667  | 9.476146687  |
| C | 19.886336962 | 10.073264720 | 10.979867751 |
| C | 19.682888197 | 10.796175692 | 12.157498011 |
| H | 18.689803874 | 10.810117888 | 12.612985108 |
| C | 23.587591035 | 10.824836629 | 10.333207069 |
| H | 23.559073412 | 10.426000266 | 9.311369600  |
| H | 24.292328134 | 10.208446612 | 10.912616005 |
| H | 24.000921114 | 11.842618715 | 10.295246089 |
| C | 18.766773711 | 9.292324339  | 10.343652129 |
| H | 18.976202041 | 8.212183693  | 10.368494015 |
| H | 18.635984100 | 9.570345408  | 9.287892519  |
| H | 17.813712549 | 9.462292205  | 10.861223174 |

## Literature

1. R. K. Harris, E. D. Becker, S. M. Cabral de Menezes, R. Goodfellow and P. Granger, *Pure Appl. Chem.*, 2001, **73**, 1795-1818.
2. T. Heitkemper, L. Naß and C. P. Sindlinger, *Dalton Trans.*, 2020, **49**, 2706 - 2714.
3. F. X. Kohl and P. Jutzi, *J. Organomet. Chem.*, 1983, **243**, 31-34.
4. E. S. Taher, P. Guest, A. Benton, X. Ma, M. G. Banwell, A. C. Willis, T. Seiser, T. W. Newton and J. Hutzler, *J. Org. Chem.*, 2017, **82**, 211-233.
5. Bruker, *SAINT V8.30C*, Bruker AXS, WI, USA, Madison, **2013**.
6. a.) G.M: Sheldrick, *SADABS*, University of Göttingen, Göttingen, Germany, **2008**; b.) L. Krause, R. Herbst-Irmer, G. M. Sheldrick and D. Stalke, *J. Appl. Crystallogr.*, 2015, **48**, 3-10.
7. *TWINABS 2012/1*, Madison, Wisconsin, USA., **2012**.
8. G. M. Sheldrick, *Acta Crystallogr.*, 2015, **A71**, 3.
9. G. M. Sheldrick, *Acta Crystallogr.*, 2015, **C71**, 3.
10. C. B. Hübschle, G. M. Sheldrick and B. Dittrich, *J. Appl. Crystallogr.*, 2011, **44**, 1281-1284.
11. D. Kratzert and I. Krossing, *J. Appl. Crystallogr.*, 2018, **51**, 928-934.
12. R. Herbst-Irmer, *Zeitschrift für Kristallographie - Crystalline Materials*, 2016, **231**, 573-581.
13. a.) F. Neese, *Wiley Interdiscip. Rev. Comput. Mol. Sci.*, 2012, **2**, 73-78; b.) F. Neese, *Wiley Interdiscip. Rev. Comput. Mol. Sci.*, 2018, **8**, e1327.
14. S. Grimme, S. Ehrlich and L. Goerigk, *J. Comput. Chem.*, 2011, **32**, 1456-1465.
15. a.) A. D. Becke, *Phys. Rev. A*, 1988, **38**, 3098-3100; b.) J. P. Perdew and W. Yue, *Phys. Rev. B*, 1986, **33**, 8800-8802; c.) A. Schäfer, C. Huber and R. Ahlrichs, *J. Chem. Phys.*, 1994, **100**, 5829-5835; d.) F. Weigend and R. Ahlrichs, *Phys. Chem. Chem. Phys.*, 2005, **7**, 3297-3305; e.) K. Eichkorn, F. Weigend, O. Treutler and R. Ahlrichs, *Theor. Chem. Acc.*, 1997, **97**, 119-124.
16. a.) E. D. Glendening, C. R. Landis and F. Weinhold, *Wiley Interdiscip. Rev. Comput. Mol. Sci.*, 2012, **2**, 1-42; b.) Autor, *NBO7.0*, University of Wisconsin Madison, **2018**.
17. a.) G. Zhurko, *Chemcraft - graphical program for visualization of quantum chemistry computations*. Ivanovo, Russia, **2005**, <https://www.chemcraftprog.com/>; b.) G. Knizia and J. E. M. N. Klein, *Angew. Chem. Int. Ed.*, 2015, **54**, 5518-5522; c.) G. Knizia, *IboView*, **2015**.
18. D. Andrae, U. Häußermann, M. Dolg, H. Stoll and H. Preuß, *Theoretica chimica acta*, 1990, **77**, 123-141.
19. S. S. Rohman, C. Kashyap, S. S. Ullah and A. K. Guha, *Polyhedron*, 2019, **170**, 1-6.
20. R. F. W. Bader, *Atoms in Molecules A Quantum Theory*, Oxford University Press, Oxford, 1990.
21. T. A. Keith, *AIMAll (Version 19.02.13)*, Overland Parks KS USA, **2019**.
22. T. Lu and F. Chen, *J. Comput. Chem.*, 2012, **33**, 580-592.
23. T. D. Goddard, C. C. Huang, E. C. Meng, E. F. Pettersen, G. S. Couch, J. H. Morris and T. E. Ferrin, *Protein Science*, 2018, **27**, 14-25.
24. J. P. Perdew, K. Burke and M. Ernzerhof, *Phys. Rev. Lett.*, 1996, **77**, 3865-3868.
25. C. P. Sindlinger, F. S. W. Aicher and L. Wesemann, *Inorg. Chem.*, 2017, **56**, 548-560.
26. C. Zeppek, J. Pichler, A. Torvisco, M. Flock and F. Uhlig, *J. Organomet. Chem.*, 2013, **740**, 41-49.
27. B. Wrackmeyer, A. Sebald and L. H. Merwin, *Magnetic Resonance in Chemistry*, 1991, **29**, 260-263.
28. L. Broeckeaert, J. Turek, R. Olejník, A. Růžička, M. Biesemans, P. Geerlings, R. Willem and F. De Proft, *Organometallics*, 2013, **32**, 2121-2134.
29. P. Wilfling, K. Schittelkopf, M. Flock, R. H. Herber, P. P. Power and R. C. Fischer, *Organometallics*, 2015, **34**, 2222-2232.
30. A. V. Protchenko, K. H. Birjukumar, D. Dange, A. D. Schwarz, D. Vidovic, C. Jones, N. Kaltsoyannis, P. Mountford and S. Aldridge, *J. Am. Chem. Soc.*, 2012, **134**, 6500-6503.
31. K. M. Krebs, J. Wiederkehr, J. Schneider, H. Schubert, K. Eichele and L. Wesemann, *Angew. Chem. Int. Ed.*, 2015, **54**, 5502-5506.

32. K. W. Zilm, G. A. Lawless, R. M. Merrill, J. M. Millar and G. G. Webb, *J. Am. Chem. Soc.*, 1987, **109**, 7236-7238.
33. A. D. Phillips, S. Hino and P. P. Power, *J. Am. Chem. Soc.*, 2003, **125**, 7520-7521.
34. J. B. Lambert, L. Lin, S. Keinan and T. Müller, *J. Am. Chem. Soc.*, 2003, **125**, 6022-6023.
35. J. Li, C. Schenk, F. Winter, H. Scherer, N. Trapp, A. Higelin, S. Keller, R. Pöttgen, I. Krossing and C. Jones, *Angew. Chem. Int. Ed.*, 2012, **51**, 9557-9561.
36. C. P. Sindlinger and L. Wesemann, *Chem. Sci.*, 2014, **5**, 2739-2746.
